# Supplementary material for: Gene Expression Profiling of PDGFRA Mutant GIST Reveals Immune Signatures as a Specific Fingerprint of D842V Exon 18 Mutation
Source: Front Immunol. 2020 Jun 2;11:851. doi: 10.3389/fimmu.2020.00851 (PMC7326057; doi:10.3389/fimmu.2020.00851)
Supplement: Supplementary file 2 [file Data_Sheet_1.xlsx]

## Sheet: Supplementary Table S1
Supplementary Table S1.
Differentially expressed genes between D842V and non-D842V GIST. The table reports genes with p-value<0.05.						D842V					non-D842V
Probe	Gene Symbol	Gene name	logFC	AveExpr	P.Value	GIST140	GIST165	GIST138	GIST142	GIST136	GIST12	GIST168	GIST05	GIST15	GIST26
TC0X00011277.hg.1	CA5B	carbonic anhydrase 5B	-1.22167	7.71362	8.83e-05	7.1372	7.0635	7.1227	7.5759	6.6147	8.2732	8.2077	8.7856	8.0986	8.2571
TC0500012312.hg.1	SPRY4	sprouty RTK signaling antagonist 4	-1.07625	9.49177	0.000188412	9.3181	9.1724	8.8879	8.7122	8.6776	9.9601	10.4225	10.1859	9.7535	9.8276
TC0200012713.hg.1	BCL11A	B-cell CLL/lymphoma 11A	-2.01997	6.21497	0.000212041	5.525	5.3937	4.7987	5.0413	5.2663	7.7721	7.8761	8.04	6.7423	5.6943
TC0100012247.hg.1	KIF26B	kinesin family member 26B	-2.09482	7.97257	0.000236122	7.7201	7.5596	6.1424	6.4675	6.7363	8.3849	9.4527	9.8752	9.5266	7.8605
TC0400012972.hg.1	RNF150	ring finger protein 150	-1.48559	6.10309	0.00032509	4.4321	5.7734	6.016	5.5696	5.0104	6.6943	7.064	6.4642	6.5842	7.4227
TC0400008725.hg.1	PCDH10	protocadherin 10	-2.74744	5.22972	0.000348576	3.1703	3.3732	3.4635	3.626	5.6469	4.8316	7.7805	7.1891	7.2264	5.9897
TC1700009694.hg.1	MYH10	myosin heavy chain 10	-1.12223	9.75071	0.000426028	9.142	8.7572	9.0546	9.3034	9.6908	10.6782	9.873	10.7293	10.2525	10.0262
TC0500007050.hg.1	PDZD2	PDZ domain containing 2	-2.40218	7.11053	0.00045406	5.1426	6.2727	6.5808	6.0717	5.4794	7.8957	9.8493	9.2268	6.6022	7.984
TC0X00008940.hg.1	MXRA5	matrix remodeling associated 5	-2.4879	6.1794	0.000462263	5.5297	5.0008	3.7353	4.8457	5.5656	7.4384	8.609	7.0664	5.5257	8.4773
TC1000008396.hg.1	IFIT2	interferon induced protein with tetratricopeptide repeats 2	1.181	6.83628	0.000496072	7.2388	7.6985	7.6401	6.6932	7.8632	6.6037	6.0654	5.9203	6.6116	6.0278
TC1200009890.hg.1	CLEC1A	C-type lectin domain family 1 member A	-1.91581	6.02926	0.000500331	4.2633	5.0439	5.0357	5.0402	5.9738	7.1298	6.3899	5.7792	8.0488	7.5883
TC0700010687.hg.1	KBTBD2	kelch repeat and BTB domain containing 2	-1.12549	4.71611	0.00051984	3.9788	4.131	3.859	4.2757	4.5223	4.8962	5.1289	4.8496	5.5674	5.9523
TC0400010132.hg.1	TAPT1	transmembrane anterior posterior transformation 1	-1.02911	6.18657	0.00057047	5.9273	5.4476	5.5456	6.1351	5.3045	6.8093	6.5192	6.8908	7.0358	6.2505
TC0400012907.hg.1	ADGRA3	adhesion G protein-coupled receptor A3	-1.13892	4.34388	0.000605644	4.3039	3.3996	3.3213	4.141	3.7063	4.8305	4.6057	5.4582	5.0651	4.6072
TC1700007481.hg.1	RAB11FIP4	RAB11 family interacting protein 4	0.872719	4.76941	0.00066008	4.8443	5.0367	5.6474	5.0862	5.4143	4.1694	4.3661	4.43	4.3072	4.3925
TC0900011200.hg.1	KIAA0368	KIAA0368	-0.791588	6.53325	0.000665156	6.0655	6.0245	6.0054	6.5155	6.0765	7.0512	6.8253	6.863	6.8463	7.0594
TC1200012190.hg.1	OASL	2'-5'-oligoadenylate synthetase like	0.930253	5.86574	0.000755245	6.1503	6.6061	6.4662	5.7415	6.6903	5.3989	5.5008	5.2186	5.5421	5.3427
TC0500012299.hg.1	PCDH12	protocadherin 12	-1.29907	6.28031	0.000783115	5.3186	5.4984	5.7941	5.7606	5.7821	6.778	7.7651	6.9299	7.2745	5.9018
TC0900008219.hg.1	NR4A3	nuclear receptor subfamily 4 group A member 3	-1.61229	5.32449	0.000813901	5.5211	4.4781	4.1758	4.4501	3.9665	5.8726	5.7819	5.4438	6.1703	7.3845
TC0300010427.hg.1	RFTN1	raftlin. lipid raft linker 1	1.31897	6.76443	0.000852433	7.5512	6.8847	7.1914	8.1936	7.2986	6.6927	6.455	5.7298	6.3202	5.327
TC1200010809.hg.1	ATF7	activating transcription factor 7	-0.793134	7.97053	0.000865723	7.6377	7.6146	7.1461	7.7805	7.6909	8.2707	8.3637	8.5823	8.2781	8.3408
TC0300013670.hg.1	TNK2	tyrosine kinase non receptor 2	0.774691	7.57984	0.00091328	8.0478	8.0352	7.8137	7.8179	8.1214	6.9341	7.1335	7.0872	7.5083	7.2994
TC1400010632.hg.1	GPATCH2L	G-patch domain containing 2 like	-1.13043	6.88792	0.000928699	5.5852	6.1573	6.5644	6.2475	7.059	7.4789	7.3333	7.7318	7.6695	7.0522
TC1000008585.hg.1	MARVELD1	MARVEL domain containing 1	-1.20059	6.66632	0.000938966	5.582	6.0885	6.2595	6.5092	5.891	6.8216	7.9206	7.7909	6.67	7.13
TC1000010976.hg.1	SPOCK2	SPARC/osteonectin. cwcv and kazal like domains proteoglycan 2	1.118	7.73003	0.000941307	8.0522	7.7148	8.3515	8.4925	8.8341	7.2493	7.5335	7.2152	7.4031	6.454
TC0100009738.hg.1	GPR89A	G protein-coupled receptor 89A	-1.22306	5.30275	0.000991892	4.7118	4.3557	4.4563	5.2043	4.7281	5.6229	5.1246	5.8809	6.2024	6.7407
TC0700013578.hg.1	SEMA3A	semaphorin 3A	-1.5908	7.99299	0.00100106	7.945	7.2149	6.5437	7.0349	7.2494	9.2811	8.534	9.4581	7.4404	9.2283
TC1000009737.hg.1	ITIH5	inter-alpha-trypsin inhibitor heavy chain family member 5	-1.14421	6.94603	0.00100208	6.4723	6.3166	6.1425	6.3455	6.5928	7.7836	7.8703	8.183	6.9233	6.8305
TC0900010352.hg.1	PTAR1	protein prenyltransferase alpha subunit repeat containing 1	-0.798314	6.762	0.00102294	6.2902	6.1241	6.4003	6.6753	6.3243	7.2925	7.0187	6.8389	7.2507	7.405
TC0500013155.hg.1	BASP1	brain abundant membrane attached signal protein 1	-1.06293	7.34476	0.00110584	6.5007	7.027	7.223	6.312	7.0037	7.1351	8.1133	7.9742	8.1518	8.0068
TC0700006864.hg.1	SP4	Sp4 transcription factor	-0.707545	6.04952	0.00116134	5.7142	5.7257	5.598	5.9319	5.5089	6.3892	6.3716	6.5989	6.3001	6.3567
TC1800007440.hg.1	ZNF532	zinc finger protein 532	-0.796257	7.97925	0.00119809	7.5924	7.3943	7.3028	7.6228	7.9933	8.3006	8.2024	8.2456	8.5378	8.6005
TC1000009387.hg.1	PPP2R2D	protein phosphatase 2 regulatory subunit Bdelta	-0.769764	6.45654	0.00123717	5.8763	5.9684	6.16	6.4671	5.8864	6.7886	7.0698	6.7141	6.7058	6.9288
TC0200015650.hg.1	FN1	fibronectin 1	-1.88788	8.07283	0.00125341	6.9915	6.869	7.0518	7.5928	7.1393	7.8182	10.2478	9.4794	7.6657	9.8728
TC0200015770.hg.1	GLB1L	galactosidase beta 1 like	1.1602	6.43026	0.00126671	7.3009	7.0168	5.9929	6.9571	7.7842	5.8683	5.963	5.9632	5.6291	5.8272
TC2200006793.hg.1	GGTLC2	gamma-glutamyltransferase light chain 2	0.837098	6.37296	0.00127639	6.8575	6.9796	7.0668	6.4764	6.5773	5.77	6.3311	5.6835	6.1496	5.838
TC0100010654.hg.1	KLHL20	kelch like family member 20	-0.797097	6.84349	0.00128611	6.4078	6.4531	6.1405	6.5746	6.6487	7.1921	6.8825	7.2008	7.6271	7.3077
TC0200016413.hg.1	FKBP1B	FK506 binding protein 1B	0.720923	6.11687	0.00129298	6.7219	6.698	6.3963	6.2181	6.3524	5.7198	5.6549	5.7737	5.81	5.8237
TC0200006679.hg.1	C2orf48	chromosome 2 open reading frame 48	0.826136	6.80486	0.00137528	7.1608	7.5318	7.1598	7.3696	6.8677	6.5586	6.5863	6.2285	5.9848	6.6008
TC0100010786.hg.1	FAM163A	family with sequence similarity 163 member A	-1.76034	8.59444	0.00138448	8.3425	8.0865	6.1501	8.5343	7.458	9.7112	9.8755	10.0748	9.2006	8.511
TC0800012285.hg.1	HMBOX1	homeobox containing 1	-0.878962	5.98567	0.00139508	5.3799	5.2505	5.7423	5.5614	5.7967	6.6014	6.24	6.8067	6.5837	5.8939
TC0900010886.hg.1	PTCH1	patched 1	-0.880579	9.09043	0.00142736	8.6094	8.5422	8.0796	8.8817	9.1377	9.5442	9.2581	9.5789	9.5349	9.7374
TC0100015680.hg.1	NBPF9	neuroblastoma breakpoint family member 9	-0.889217	5.8384	0.00143197	5.4086	5.4536	5.1014	5.6005	5.4049	6.9514	6.0369	6.076	6.37	5.9808
TC0600014105.hg.1	C2	complement C2	1.39395	7.94935	0.00148843	8.065	7.771	9.3439	8.5025	9.5493	7.4038	7.5947	6.6946	6.9501	7.6186
TC1400006742.hg.1	KHNYN	KH and NYN domain containing	-0.797372	5.90115	0.00150277	5.3613	5.3853	5.1307	5.6731	5.962	6.4224	6.1144	6.4286	6.3388	6.1951
TC1500008127.hg.1	ADAMTSL3	ADAMTS like 3	-1.33519	8.2076	0.00152168	8.478	7.407	7.4257	6.7588	7.6305	8.5612	9.7512	8.6857	9.0784	8.2995
TC0100016548.hg.1	ABL2	ABL proto-oncogene 2. non-receptor tyrosine kinase	-0.78241	5.90133	0.00154991	5.546	5.3166	5.7643	5.2555	5.6682	6.6264	6.2748	6.3545	6.2947	5.9123
TC0500012223.hg.1	NRG2	neuregulin 2	0.97262	6.49397	0.00155546	6.7657	6.657	7.2273	7.3554	6.896	6.5254	5.8846	6.2059	6.0805	5.3419
TC0200014672.hg.1	NR4A2	nuclear receptor subfamily 4 group A member 2	-1.53023	5.34941	0.00159489	4.7337	4.6329	4.3999	4.4658	4.6893	6.3106	5.7912	5.1255	5.6334	7.7119
TC0500013332.hg.1	DMGDH	dimethylglycine dehydrogenase	1.48479	4.54801	0.00163088	5.5612	4.4008	5.1038	5.2605	6.1257	4.5432	3.2732	3.9566	4.4097	2.8452
TC1100007414.hg.1	LOC399886	uncharacterized LOC399886	0.806009	5.54305	0.00167615	6.4544	5.9582	5.7749	5.9317	5.6111	5.0315	5.4719	4.999	5.175	5.0227
TC1100009101.hg.1	ZBTB16	zinc finger and BTB domain containing 16	-1.30155	7.23105	0.00168118	6.2326	7.0501	6.7104	6.9782	5.93	8.4505	7.1207	8.6417	7.3371	7.8591
TC1700010916.hg.1	ARL17B	ADP ribosylation factor like GTPase 17B	-0.951094	6.50702	0.00176768	5.4195	6.0051	6.5365	5.8983	6.2979	7.0175	6.5177	7.075	7.3846	6.9181
TC1400009190.hg.1	GNPNAT1	glucosamine-phosphate N-acetyltransferase 1	-0.941865	5.7471	0.00184849	4.728	5.0489	5.6903	5.2495	5.6641	5.6919	6.4353	6.1743	6.2643	6.5244
TC0200016402.hg.1	RSAD2	radical S-adenosyl methionine domain containing 2	1.76868	7.13489	0.00191174	7.8663	8.4759	8.3666	6.9167	8.4706	7.8299	5.3123	5.8449	6.6681	5.5977
TC0600014369.hg.1	LINC00473	long intergenic non-protein coding RNA 473	-1.15263	6.20245	0.00196766	5.7775	5.9534	4.9842	5.8191	5.5965	7.6332	5.9282	6.606	6.9068	6.8196
TC0700013254.hg.1	PTPRN2	protein tyrosine phosphatase. receptor type N2	1.33194	6.80424	0.00197494	7.0543	7.5256	7.1682	8.6845	6.9185	5.8398	5.8502	6.0404	7.0212	5.9397
TC1800008458.hg.1	ZNF24	zinc finger protein 24	-0.743108	7.31982	0.0020302	7.069	6.7235	6.7609	7.2497	6.9383	7.5817	7.5765	7.4653	7.762	8.0714
TC1400010755.hg.1	PSMA3-AS1	PSMA3 antisense RNA 1	-0.702473	6.23562	0.00224473	5.8943	5.9574	5.9816	5.4924	6.0963	6.5842	6.4982	6.7374	6.749	6.3655
TC0200009078.hg.1	EPB41L5	erythrocyte membrane protein band 4.1 like 5	-0.783953	5.40064	0.00225248	5.0858	4.8174	5.4297	4.9027	4.8078	5.6466	5.7896	6.2188	5.8526	5.4555
TC1000007404.hg.1	CSGALNACT2	chondroitin sulfate N-acetylgalactosaminyltransferase 2	-0.99562	5.49506	0.00234916	5.6375	4.7555	4.7936	5.208	4.5917	6.2199	6.0312	5.8758	5.342	6.4954
TC1100007139.hg.1	METTL15	methyltransferase like 15	-0.771726	6.35601	0.0024368	5.8324	6.4248	6.1133	5.4383	6.0419	6.8233	6.5852	6.7156	6.7314	6.8538
TC1000011596.hg.1	DNMBP	dynamin binding protein	-0.921225	6.61223	0.00251569	6.0889	5.9566	5.8552	6.6621	6.1954	7.2	7.1306	7.0408	6.3836	7.6093
TC0100016963.hg.1	KDM5B	lysine demethylase 5B	-0.911272	7.44277	0.00252398	6.6979	6.5207	6.9363	7.1081	7.6727	7.5712	7.6504	7.8887	8.131	8.2507
TC0200010790.hg.1	GPBAR1	G protein-coupled bile acid receptor 1	2.00014	8.31907	0.00252733	8.8439	9.3185	8.2919	9.9725	10.1689	6.8246	6.4489	7.8745	9.2071	6.24
TC1900011004.hg.1	SLC1A5	solute carrier family 1 member 5	-0.888452	8.73324	0.00255356	8.2646	8.0581	8.3	8.5759	8.2465	9.2676	8.5733	8.8395	9.4333	9.7737
TC2100006909.hg.1	HUNK	hormonally up-regulated Neu-associated kinase	-1.40728	4.73238	0.0025543	3.5882	3.9026	4.3693	4.0471	4.2366	5.0343	6.0195	6.7536	4.4879	4.8848
TC0800011150.hg.1	TP53INP1	tumor protein p53 inducible nuclear protein 1	-0.891339	5.56856	0.00255803	4.8752	4.8883	5.071	5.5893	5.1908	6.4299	6.3608	5.7082	5.4489	6.1234
TC1000008670.hg.1	TLX1	T-cell leukemia homeobox 1	0.820816	5.4703	0.00263043	6.2153	6.3308	5.5575	5.6492	5.6506	5.3174	5.2791	5.1241	4.7665	4.8124
TC0300011324.hg.1	FHIT	fragile histidine triad	-0.85864	5.71724	0.00264745	5.3319	4.9144	4.992	5.5951	5.6062	6.0617	5.6543	6.0149	6.4843	6.5175
TC1200006909.hg.1	EMP1	epithelial membrane protein 1	-1.10998	7.24836	0.00266452	6.8389	6.7363	6.6428	6.8634	6.3854	7.1494	8.0655	7.0838	7.9546	8.7634
TC1600011322.hg.1	MCRIP2	MAPK regulated corepressor interacting protein 2	0.653917	6.02765	0.00271292	6.6275	6.3846	6.2003	6.4689	6.0916	5.686	5.8076	5.6088	5.8074	5.5937
TC1900008699.hg.1	ZNF528	zinc finger protein 528	-0.659582	5.47563	0.00273083	5.2538	5.114	4.9307	5.0734	5.3573	5.4997	5.9094	5.8287	5.9787	5.8105
TC0200011624.hg.1	CMPK2	cytidine/uridine monophosphate kinase 2	1.5159	5.94508	0.00299817	6.9436	6.7788	6.9761	5.5701	7.2465	6.4585	4.7388	4.6343	5.7301	4.3739
TC0100018519.hg.1	F11R	F11 receptor	-0.797691	6.13436	0.00302456	5.7966	5.5835	5.5714	5.6733	6.0529	6.1973	6.1019	6.5184	6.9002	6.9483
TC0400010886.hg.1	UBA6	ubiquitin like modifier activating enzyme 6	-0.689341	5.17151	0.00308502	4.7656	4.7318	4.7738	5.3103	4.5527	5.5616	5.6378	5.4336	5.5902	5.3577
TC2000007227.hg.1	ROMO1	reactive oxygen species modulator 1	0.677526	9.07889	0.00323618	9.4207	9.4709	9.63	9.2381	9.3285	8.9002	9.1055	8.6361	8.466	8.5929
TC0200006779.hg.1	FAM84A	family with sequence similarity 84 member A	0.977355	6.57907	0.003252	6.7634	6.8377	7.8642	6.8008	7.0726	6.277	6.0132	6.3176	6.4653	5.3789
TC2200006501.hg.1	IL17RA	interleukin 17 receptor A	-0.821624	6.93086	0.0032704	6.1475	6.2445	7.0308	6.1961	6.9813	7.4768	7.1953	7.441	7.1398	7.4555
TC0500011497.hg.1	GLRX	glutaredoxin	0.625863	7.7771	0.0032832	8.1593	8.122	7.9808	8.2633	7.9248	7.282	7.691	7.3236	7.5746	7.4497
TC1600007953.hg.1	MT4	metallothionein 4	0.739824	5.84508	0.00330518	6.2908	6.6271	6.191	5.9795	5.9866	5.3512	5.198	5.2896	5.7735	5.7636
TC0800008011.hg.1	ZFHX4	zinc finger homeobox 4	-1.09807	7.92271	0.00335087	6.4637	7.6409	7.4271	8.1613	7.1753	9.2053	8.3254	8.2356	8.2767	8.3157
TC1600010740.hg.1	PDXDC2P	pyridoxal dependent decarboxylase domain containing 2. pseudogene	-0.831125	5.36617	0.00339275	5.2636	4.3483	4.7091	5.0579	5.3741	6.132	5.8275	5.7202	5.4415	5.7875
TC1500009130.hg.1	RHOV	ras homolog family member V	0.819748	5.52638	0.00345335	6.0986	6.0386	6.1927	5.6157	5.7355	5.7121	4.6906	4.8104	5.0604	5.3091
TC1600007285.hg.1	HS3ST4	heparan sulfate-glucosamine 3-sulfotransferase 4	0.693649	5.45791	0.00352244	5.7374	5.9007	6.1131	5.6541	5.6183	5.5737	5.0414	4.991	5.0136	4.9358
TC0500007875.hg.1	BHMT2	betaine--homocysteine S-methyltransferase 2	1.31231	7.94404	0.00353582	9.05	8.6002	8.3954	8.2026	8.7527	8.827	6.9809	7.2457	6.7439	6.6419
TC1700011984.hg.1	NPTX1	neuronal pentraxin 1	1.82277	7.15981	0.0035706	7.5456	7.7796	8.9945	6.854	9.1821	6.6475	5.7171	4.8868	7.423	6.5677
TC0100013548.hg.1	PUM1	pumilio RNA binding family member 1	-0.648338	7.79414	0.00357505	7.5408	7.6035	7.215	7.2822	7.7083	8.2898	7.9529	8.2303	7.9297	8.1889
TC1000009612.hg.1	KLF6	Kruppel like factor 6	-0.728025	8.18314	0.00368317	7.4913	7.5867	8.1662	8.0648	7.7867	8.5669	8.4578	8.4682	8.295	8.9479
TC0800006680.hg.1	TNKS	tankyrase	-0.770902	5.03985	0.00370922	4.4953	4.3989	4.789	4.5645	5.0243	4.9417	5.2887	5.9093	5.4666	5.5203
TC1000008435.hg.1	HECTD2	HECT domain E3 ubiquitin protein ligase 2	-0.670649	5.12047	0.00373888	5.071	4.9711	4.8292	4.5908	4.4637	5.4823	5.1549	5.5457	5.4998	5.5963
TC1400009829.hg.1	CEP128	centrosomal protein 128	-1.15604	4.72224	0.00378028	3.6913	3.5264	4.1606	4.0285	5.3143	5.5878	4.8365	5.5707	4.8384	5.6679
TC0700012461.hg.1	WASL	Wiskott-Aldrich syndrome like	-0.775562	9.95466	0.00382732	9.3604	9.1013	9.6548	9.6217	10.0962	10.2112	10.4252	10.7195	10.2612	10.0951
TC0700012701.hg.1	CNOT4	CCR4-NOT transcription complex subunit 4	-0.824852	6.56868	0.00392599	5.9724	5.7055	5.9718	6.3643	6.7673	7.2807	6.6061	7.2266	6.8225	6.9696
TC0500010018.hg.1	C5orf49	chromosome 5 open reading frame 49	0.806846	4.9362	0.00393087	5.7513	5.8517	4.9968	5.2625	4.8358	4.8241	4.5265	4.4213	4.4994	4.3927
TC0100017844.hg.1	NID1	nidogen 1	-1.56304	8.0275	0.00408658	7.0606	7.1793	6.7901	7.1986	8.0013	7.2203	8.8404	8.4851	9.2516	10.2477
TC0100018486.hg.1	CDC42SE1	CDC42 small effector 1	-0.759091	8.02084	0.00409351	7.9061	7.7334	7.0074	7.6789	7.8807	8.2337	8.2119	8.3191	8.4694	8.7679
TC0400012437.hg.1	SCRG1	stimulator of chondrogenesis 1	2.67874	7.36032	0.00422528	9.0624	9.2895	8.6268	9.0326	7.4872	5.9547	6.4145	6.2926	8.5517	2.8912
TC0800008243.hg.1	PDP1	pyruvate dehyrogenase phosphatase catalytic subunit 1	-0.684059	7.0188	0.00425725	6.5627	6.7245	6.9684	6.289	6.8393	7.3883	6.9844	7.3767	7.5199	7.5349
TC1700007344.hg.1	NLK	nemo like kinase	-0.792893	6.88851	0.00428233	6.5524	6.5035	6.1111	6.4919	6.8014	7.2969	7.2366	7.9623	6.956	6.973
TC0200010219.hg.1	FAM171B	family with sequence similarity 171 member B	-0.734789	6.63711	0.00430554	6.2732	6.4351	5.8781	6.011	6.7511	7.0981	7.1066	7.2685	6.7606	6.7887
TC0600007231.hg.1	CARMIL1	capping protein regulator and myosin 1 linker 1	1.48382	6.0119	0.00431308	6.6341	6.4405	7.4067	5.3939	7.8937	4.7604	5.4701	4.7193	6.2042	5.196
TC0700013370.hg.1	ZNF107	zinc finger protein 107	-0.894878	5.91356	0.00435043	5.2185	5.125	5.8999	5.4668	5.6204	6.7635	6.2131	6.5974	5.5515	6.6795
TC1500009281.hg.1	DUOX2	dual oxidase 2	0.627113	4.98198	0.00438527	5.3406	5.5995	5.2009	5.3892	4.9475	4.5094	4.7676	4.786	4.6396	4.6394
TC0100009800.hg.1	GPR89B	G protein-coupled receptor 89B	-0.706936	6.24376	0.00439334	5.8805	6.2701	5.4385	5.8651	5.9972	6.4428	6.2688	6.7277	6.8101	6.7366
TC1600009085.hg.1	NTHL1	nth like DNA glycosylase 1	0.633865	4.70216	0.00441511	5.1711	5.0726	4.7684	4.9513	5.132	4.6437	4.1637	4.5565	4.4157	4.1464
TC1100011141.hg.1	RCOR2	REST corepressor 2	0.939376	5.59018	0.00452437	5.9904	5.6516	5.8511	6.3991	6.4071	4.9901	5.2401	4.2831	5.3285	5.7606
TC1900011794.hg.1	ZNF701	zinc finger protein 701	-0.627873	7.0598	0.00454532	6.89	6.5635	6.628	6.7206	6.9271	7.3742	7.106	7.4216	7.2612	7.7057
TC0100009658.hg.1	SRGAP2C	SLIT-ROBO Rho GTPase activating protein 2C	-0.59081	7.57701	0.00456374	7.1606	7.4566	7.3072	7.1264	7.3572	7.8951	7.7614	7.7017	7.892	8.1117
TC1500010660.hg.1	PCSK6	proprotein convertase subtilisin/kexin type 6	1.62895	7.94694	0.00457079	9.0994	8.8646	9.4413	8.2601	8.1417	8.1639	7.2575	6.425	8.2523	5.5635
TC1200011321.hg.1	OSBPL8	oxysterol binding protein like 8	-0.762572	7.4564	0.00458165	7.3516	6.4643	7.2366	7.3947	6.9283	7.5632	8.1798	7.7104	7.808	7.927
TC1800006447.hg.1	CLUL1	clusterin like 1	1.03859	4.97144	0.00460146	4.7061	5.3228	5.9889	5.0223	6.4136	4.1805	4.6746	4.4984	4.6788	4.2284
TC0100015596.hg.1	LIX1L	limb and CNS expressed 1 like	-0.951471	7.837	0.00460895	7.066	6.6502	7.1261	7.9468	8.0172	8.1189	8.1711	8.5649	8.0652	8.6435
TC0100016447.hg.1	RC3H1	ring finger and CCCH-type domains 1	-0.71279	7.09553	0.00463496	6.7297	6.8819	6.3982	6.7005	6.9855	8.014	7.2298	7.2539	7.3267	7.4353
TC1600006525.hg.1	CACNA1H	calcium voltage-gated channel subunit alpha1 H	0.99616	8.6801	0.00465711	9.1871	9.2059	9.2156	9.5992	8.6831	9.041	7.9811	8.1449	8.4031	7.34
TC0800008032.hg.1	ZC2HC1A	zinc finger C2HC-type containing 1A	-0.860697	6.75683	0.00468582	6.2217	6.0842	6.5016	6.2692	6.5557	7.0937	6.7412	6.7463	7.3377	8.017
TC0500012340.hg.1	NR3C1	nuclear receptor subfamily 3 group C member 1	-0.757733	7.46655	0.00473961	6.8168	7.0197	7.2155	7.1434	7.243	7.2991	7.8244	7.6121	8.1517	8.3397
TC0500009837.hg.1	SLC12A7	solute carrier family 12 member 7	0.877737	8.10914	0.0047483	8.5534	8.9618	8.3299	8.9581	7.9369	8.2385	7.7383	7.3645	7.2558	7.7543
TC0300009916.hg.1	HES1	hes family bHLH transcription factor 1	-1.01364	8.36289	0.0047958	7.7206	8.4362	7.982	7.3504	7.7911	7.8147	9.2161	8.9165	9.1981	9.2031
TC1000008397.hg.1	IFIT3	interferon induced protein with tetratricopeptide repeats 3	1.30384	6.83451	0.00479708	7.1776	7.8165	7.929	6.1265	8.3826	6.8713	6.0627	5.5961	6.3893	5.9935
TC0500009076.hg.1	SLC26A2	solute carrier family 26 member 2	-0.623651	5.3489	0.00480002	4.9183	4.9464	4.9553	5.1688	5.1965	5.4551	5.6519	5.7146	5.4479	6.0341
TC1000006937.hg.1	PLXDC2	plexin domain containing 2	-0.8491	9.7978	0.00482406	9.1084	9.0785	9.5968	9.6611	9.4214	10.8197	10.523	9.5788	10.2476	9.9425
TC1200008126.hg.1	CPSF6	cleavage and polyadenylation specific factor 6	-1.00643	6.38251	0.00484666	4.9146	5.6438	5.8763	6.2323	6.7295	6.8525	6.5036	6.9915	6.958	7.123
TC0700011842.hg.1	PDK4	pyruvate dehydrogenase kinase 4	-1.78257	6.60621	0.00486785	7.868	4.9134	5.7535	4.4797	5.5601	6.6777	8.2757	7.4572	7.635	7.4419
TC1900011856.hg.1	CD320	CD320 molecule	0.641181	7.13405	0.00490022	7.8386	7.4042	7.2516	7.4131	7.3658	6.4836	7.0509	6.8306	6.8816	6.8205
TC0600009392.hg.1	RSPO3	R-spondin 3	2.80505	7.70467	0.00490477	9.2618	8.8362	9.4284	8.7748	9.2348	8.4337	6.6948	4.5245	8.4666	3.3911
TC1700009319.hg.1	VPS53	VPS53. GARP complex subunit	-0.936193	6.62817	0.00490845	6.0168	5.9633	5.8012	6.2239	6.7951	6.572	6.6541	7.8428	7.3355	7.0769
TC0600013186.hg.1	CTGF	connective tissue growth factor	-1.54954	7.25024	0.00491439	6.3304	6.9506	6.481	6.3099	6.3055	7.6279	9.9066	8.1466	6.6448	7.7991
TC0500008785.hg.1	EGR1	early growth response 1	-1.50782	10.9573	0.00495204	10.9874	10.1539	9.2864	11.0347	9.5546	12.2908	11.8758	11.7133	10.2388	12.4374
TC0900009569.hg.1	NFIB	nuclear factor I B	-0.881271	9.89821	0.00499101	9.7171	9.1431	8.9917	9.6135	9.8225	10.7013	10.6173	9.8935	9.7699	10.7122
TC0100018080.hg.1	AHCTF1	AT-hook containing transcription factor 1	-0.934664	6.87914	0.00501543	6.5148	6.5511	5.7028	6.3734	6.9168	7.1046	6.8077	7.1377	7.7468	7.9356
TC0100006483.hg.1	ISG15	ISG15 ubiquitin-like modifier	0.954968	6.34838	0.00505592	6.8381	7.1767	7.0552	6.1778	6.8815	6.5189	6.3569	5.3554	5.3471	5.7761
TC1900006642.hg.1	C19orf71	chromosome 19 open reading frame 71	0.624582	6.63781	0.00512702	7.0686	7.2867	6.9889	6.7566	6.6497	6.3197	6.512	6.2427	6.1662	6.387
TC0900008150.hg.1	TMOD1	tropomodulin 1	0.972189	8.29858	0.00514049	8.412	8.7843	8.8526	9.2456	8.6289	7.5151	7.7908	7.5667	8.8769	7.3129
TC1000007427.hg.1	ZNF485	zinc finger protein 485	0.783179	6.84324	0.00519617	7.489	7.6834	7.0981	7.116	6.7877	6.9062	6.3005	6.4984	6.5764	5.9768
TC1000007846.hg.1	SIRT1	sirtuin 1	-0.613465	7.14678	0.00524582	6.9271	6.6355	6.9844	6.7476	6.9056	7.1578	7.4634	7.5519	7.326	7.7685
TC1700008095.hg.1	LRRC37A	leucine rich repeat containing 37A	-0.654571	7.53535	0.0052956	7.0879	7.0784	7.2536	7.2019	7.4185	8.1592	7.5529	8.157	7.8973	7.5469
TC1600007874.hg.1	CHD9	chromodomain helicase DNA binding protein 9	-0.741197	7.26588	0.00538321	6.8378	6.5965	6.9396	7.2257	6.8767	8.0916	7.5488	7.9853	7.2137	7.343
TC0300012534.hg.1	STAG1	stromal antigen 1	-0.687319	6.52074	0.005545	6.2166	5.9676	6.1372	6.1871	6.3769	6.2916	7.1528	6.7467	7.0312	7.0997
TC0100015591.hg.1	PIAS3	protein inhibitor of activated STAT 3	-1.08367	8.04143	0.00558346	7.706	7.5978	6.2885	7.4556	8.4502	8.7673	8.5537	8.6353	8.1881	8.7719
TC1200008949.hg.1	SDSL	serine dehydratase like	0.70781	6.32596	0.00562928	6.3134	6.7246	6.8127	6.5721	6.9765	5.9164	6.0915	5.5319	6.4345	5.8859
TC2000009956.hg.1	PCMTD2	protein-L-isoaspartate (D-aspartate) O-methyltransferase domain containing 2	-0.711453	6.86809	0.00563228	6.1222	6.6443	6.7695	6.311	6.7149	7.2483	7.3654	6.9937	7.6485	6.8632
TC0800007460.hg.1	HGSNAT	heparan-alpha-glucosaminide N-acetyltransferase	-0.853019	9.13684	0.00563527	8.5288	8.0551	8.8153	8.8053	9.3471	9.9914	9.3503	9.7118	9.1101	9.6531
TC0100015925.hg.1	KCNN3	potassium calcium-activated channel subfamily N member 3	-1.8295	7.47643	0.00565938	8.3961	6.3887	5.4417	6.8756	5.7063	8.9825	9.7001	7.5205	7.5393	8.2134
TC0400008641.hg.1	FAT4	FAT atypical cadherin 4	-0.831947	6.1106	0.00566468	5.7347	5.8205	5.5356	5.715	5.6674	6.6236	6.9488	6.4611	6.9751	5.6243
TC0200014772.hg.1	IFIH1	interferon induced with helicase C domain 1	1.23879	5.86738	0.00572275	5.9847	6.4454	6.9217	5.9256	7.1564	6.1409	5.3235	5.525	5.2893	3.9611
TC1800006706.hg.1	GNAL	G protein subunit alpha L	-1.58188	6.06013	0.00573699	5.0889	5.0609	5.2586	5.6434	5.2941	5.9132	7.8685	8.5324	6.1906	5.7506
TC1400007442.hg.1	ZBTB1	zinc finger and BTB domain containing 1	-0.757823	5.90861	0.00574063	5.4193	5.0619	5.6972	5.6455	5.8245	5.901	6.6419	6.5066	6.5194	5.8687
TC1400009141.hg.1	NIN	ninein	-0.94618	5.49674	0.00576225	4.6726	5.3166	5.0021	4.3408	5.7862	5.6621	5.6063	5.8096	6.4455	6.3257
TC1700010571.hg.1	MED1	mediator complex subunit 1	-0.972646	6.8684	0.00583893	5.7563	5.9172	6.694	6.2614	7.2815	7.4186	6.8004	7.6265	7.2557	7.6724
TC2000009128.hg.1	ZHX3	zinc fingers and homeoboxes 3	-0.754652	7.55427	0.00595372	7.2304	7.1295	6.906	7.3111	7.3077	7.3122	8.3022	7.8239	8.4317	7.7881
TC0600008989.hg.1	QRSL1	glutaminyl-tRNA synthase (glutamine-hydrolyzing)-like 1	-0.625067	5.02985	0.00608533	4.5108	4.6741	4.8643	4.5641	4.9733	5.1943	5.0595	5.2673	5.5978	5.593
TC0X00010380.hg.1	TCEAL6	transcription elongation factor A like 6	0.671038	7.38324	0.00626859	7.5132	8.0131	7.7548	7.8326	7.4801	6.8203	7.3496	7.3158	7.1103	6.6426
TC0100016715.hg.1	PTGS2	prostaglandin-endoperoxide synthase 2	-0.70725	5.25972	0.00645057	5.246	4.3904	4.8063	5.226	4.8618	6.0523	5.5011	5.5732	5.4208	5.5194
TC0100016035.hg.1	ETV3	ETS variant 3	-0.707183	7.57138	0.0065606	7.2719	6.9055	6.8243	7.4977	7.5896	8.0179	7.5397	8.1551	7.7653	8.1468
TC1900010334.hg.1	TSHZ3	teashirt zinc finger homeobox 3	-0.815555	6.8037	0.00657222	6.5721	5.8879	6.2525	6.269	6.9982	7.4249	6.9387	6.8788	7.0398	7.7752
TC1500008893.hg.1	MTMR10	myotubularin related protein 10	-0.694764	6.53294	0.00660487	6.0769	5.994	6.3435	6.4484	6.0649	6.651	6.7552	7.2178	7.317	6.4605
TC1700006775.hg.1	CHD3	chromodomain helicase DNA binding protein 3	-0.713397	8.53361	0.00660512	8.3217	7.7015	8.3336	8.2928	8.2351	8.892	8.7944	9.3245	8.3714	9.0692
TC0900007475.hg.1	CBWD3	COBW domain containing 3	-0.568314	6.86664	0.00670496	6.4556	6.4197	6.6552	6.6587	6.7234	6.899	7.2509	7.1077	7.0903	7.4061
TC1900010856.hg.1	PLAUR	plasminogen activator. urokinase receptor	-0.609555	4.65149	0.00673839	4.158	4.5316	4.2863	4.2549	4.5027	5.0673	5.2549	4.8644	4.5697	5.0249
TC0400012757.hg.1	RNF4	ring finger protein 4	-0.702381	8.08988	0.00680087	7.5363	7.5836	7.9756	8.0102	7.5877	8.2695	8.0436	8.3225	9.0064	8.5633
TC1400007154.hg.1	GNG2	G protein subunit gamma 2	-1.14514	7.97721	0.00680238	6.6829	7.2104	8.2356	7.0072	7.8871	7.6935	9.258	9.1299	8.3434	8.3242
TC0300010891.hg.1	ZNF852	zinc finger protein 852	-0.737501	4.72567	0.00681671	4.1468	3.8016	4.6768	4.9284	4.2311	4.9776	4.9039	5.0776	5.1775	5.3354
TC0100008602.hg.1	CACHD1	cache domain containing 1	-1.14476	6.17421	0.00682709	5.2113	5.4658	5.0894	6.1903	6.0523	6.5775	6.774	8.0077	5.9899	6.3839
TC1300008338.hg.1	MIPEP	mitochondrial intermediate peptidase	0.671483	6.0213	0.00691612	6.5109	6.2366	5.8662	6.4972	6.6742	5.358	5.9572	5.8682	5.6814	5.563
TC1900008496.hg.1	PPP1R15A	protein phosphatase 1 regulatory subunit 15A	-0.630233	5.8669	0.00691825	5.8678	5.4084	5.4629	5.7179	5.3019	6.4639	6.2036	6.2197	5.7848	6.2381
TC0800010282.hg.1	DKK4	dickkopf WNT signaling pathway inhibitor 4	2.67718	8.36336	0.00699988	9.3846	9.5724	9.8014	9.693	10.0584	8.6627	5.6013	5.1345	10.2953	5.43
TC1600008231.hg.1	NFAT5	nuclear factor of activated T-cells 5	-0.743477	7.45235	0.0070508	7.0943	6.5892	7.3938	7.0563	7.2694	8.493	7.5931	7.7041	7.7587	7.5716
TC0100010499.hg.1	POU2F1	POU class 2 homeobox 1	-0.947	7.98165	0.00707652	7.2323	7.3393	7.1594	7.759	8.0508	9.5074	8.0323	8.1186	8.2034	8.4139
TC0100016539.hg.1	ANGPTL1	angiopoietin like 1	1.45506	4.27864	0.00711335	5.1657	4.3164	5.9319	6.1079	3.5089	3.1045	3.4021	3.5203	4.4483	3.2805
TC0700007034.hg.1	CREB5	cAMP responsive element binding protein 5	-1.01863	5.52191	0.00714173	4.8613	5.7384	4.5746	5.6266	4.2621	6.6971	6.1439	5.7288	5.5104	6.0758
TC0200011503.hg.1	PXDN	peroxidasin	-1.05998	8.01878	0.00715667	8.6856	7.4549	7.2473	6.8557	7.2005	8.4235	9.2761	8.515	8.0473	8.482
TC1700011114.hg.1	ANKRD40	ankyrin repeat domain 40	-0.725233	8.10549	0.00718441	7.4361	7.6397	7.6201	7.9554	8.0631	7.9359	8.2042	8.9143	8.5977	8.6884
TC0800012474.hg.1	2002-08-01	argonaute 2. RISC catalytic component	-0.800425	7.39894	0.00733774	6.8959	6.4704	7.1065	7.4333	7.0874	7.9502	7.3075	7.8622	7.4594	8.4165
TC0800012447.hg.1	AZIN1	antizyme inhibitor 1	-0.610443	8.28449	0.00734194	7.907	7.5805	8.0734	8.029	8.3065	8.6192	8.5929	8.298	8.6729	8.7656
TC0X00008031.hg.1	IL1RAPL2	interleukin 1 receptor accessory protein like 2	-1.42212	3.9367	0.00743061	3.1234	3.0154	4.2095	2.7343	3.0456	4.8631	3.6785	5.3078	3.4732	5.9162
TC0700006445.hg.1	FAM20C	FAM20C. golgi associated secretory pathway kinase	0.826446	7.57814	0.00753651	7.8902	8.0781	8.0638	8.1037	7.8211	6.9846	7.9849	6.4786	7.4849	6.8915
TC0100015645.hg.1	NBPF11	neuroblastoma breakpoint family member 11	-0.788468	6.56915	0.00754171	6.2451	6.4014	5.6652	6.2562	6.3067	7.7983	6.8109	6.7371	6.7841	6.6865
TC1000009830.hg.1	CCDC3	coiled-coil domain containing 3	1.4445	7.69905	0.00754533	8.8497	7.9006	8.0301	7.892	9.4341	6.9596	6.574	5.723	8.4836	7.1438
TC1200007713.hg.1	SP1	Sp1 transcription factor	-0.851316	8.60378	0.00756097	8.0182	7.5086	8.1416	8.2925	8.9297	9.2264	8.4994	8.8927	9.1017	9.4269
TC0300013471.hg.1	BCL6	B-cell CLL/lymphoma 6	-0.976805	7.56591	0.00761956	7.0719	6.4883	6.8717	6.8972	8.0584	8.1958	7.9807	8.6364	7.3149	8.1438
TC0100013445.hg.1	IFI6	interferon alpha inducible protein 6	1.69467	10.3793	0.00770329	11.6766	11.0211	10.8965	10.5645	11.9743	11.4021	9.6625	9.0647	9.8338	7.6966
TC0X00008259.hg.1	NDUFA1	NADH:ubiquinone oxidoreductase subunit A1	0.680745	7.27654	0.00771136	7.6835	7.9773	7.3988	7.7105	7.3144	6.9627	7.3258	6.4712	7.1461	6.775
TC1900011777.hg.1	CYTH2	cytohesin 2	-0.751585	8.22686	0.00777739	7.6785	7.7524	7.3736	7.9573	8.4936	8.215	8.505	8.5628	8.6853	9.0452
TC0400010085.hg.1	BOD1L1	biorientation of chromosomes in cell division 1 like 1	-0.875011	6.83081	0.00777926	6.2559	6.5174	6.8496	6.8528	5.4907	7.44	7.1213	7.6948	7.2741	6.8113
TC1500009636.hg.1	ANXA2	annexin A2	-0.998032	8.45296	0.00784714	8.2808	7.3861	7.7222	8.3579	8.0227	8.4298	9.9913	8.8355	8.3199	9.1835
TC1700012198.hg.1	PIGL	phosphatidylinositol glycan anchor biosynthesis class L	-0.678262	5.58745	0.00785053	5.0921	5.4422	5.045	5.2544	5.4078	6.3731	5.4196	6.1009	5.6498	6.0896
TC0500008794.hg.1	CTNNA1	catenin alpha 1	-0.648582	8.93683	0.0078853	8.5215	8.0848	8.8933	8.6144	8.9486	9.0116	9.2753	9.1995	9.3698	9.4494
TC0100016351.hg.1	SLC19A2	solute carrier family 19 member 2	-0.94487	4.65988	0.00789348	4.3107	4.0251	3.818	4.6546	4.1288	5.2719	4.9916	4.5723	4.6292	6.1966
TC0100013760.hg.1	SF3A3	splicing factor 3a subunit 3	-0.697736	7.18779	0.00789894	7.2231	6.8978	6.18	7.1195	6.7742	7.2873	7.6747	7.6378	7.3835	7.6999
TC1700011305.hg.1	HEATR6	HEAT repeat containing 6	-0.75258	7.10557	0.00791278	6.4046	6.8405	6.8146	6.8131	6.7736	7.8933	7.2395	7.6544	7.8683	6.7538
TC0600014332.hg.1	ZBTB24	zinc finger and BTB domain containing 24	-0.830339	5.31159	0.00792139	4.6639	4.4598	5.3981	4.8891	5.0713	5.5952	5.1759	5.9423	5.4743	6.4461
TC1100008008.hg.1	POLA2	DNA polymerase alpha 2. accessory subunit	-0.74431	7.18068	0.00796576	6.7237	6.3819	6.7378	6.9541	7.2451	7.0813	7.5348	7.9597	7.2498	7.9386
TC1700008082.hg.1	MAPT	microtubule associated protein tau	1.17952	7.3181	0.0079937	8.3569	7.7928	7.4881	7.4002	8.5013	7.1017	5.8141	5.8456	7.5432	7.3371
TC0300013645.hg.1	APOD	apolipoprotein D	-2.75942	9.30996	0.00809002	10.309	7.9926	9.7346	4.5663	7.0487	10.8856	9.6206	9.9003	11.8	11.2418
TC0X00009929.hg.1	OPHN1	oligophrenin 1	-0.820287	4.96801	0.00809138	4.3227	3.8611	4.8184	4.4492	5.3379	5.2278	5.4353	5.4282	5.6984	5.101
TC1600008034.hg.1	NDRG4	NDRG family member 4	1.27147	5.77832	0.00811196	5.2399	6.5641	6.7888	7.8578	5.6197	5.4072	4.9971	5.4708	4.8976	4.9403
TC1500007939.hg.1	HMG20A	high mobility group 20A	-0.571827	6.77993	0.00813212	6.5614	6.4491	6.355	6.5658	6.5387	6.8774	7.0422	7.1836	7.4364	6.7897
TC1200012864.hg.1	CCDC92	coiled-coil domain containing 92	-0.675254	8.03617	0.00815214	7.6374	7.2917	7.6279	8.2074	7.7283	7.9218	8.3317	8.5006	8.5745	8.5405
TC1900008989.hg.1	ZNF460	zinc finger protein 460	-0.689993	7.52796	0.00822646	7.2954	7.4218	6.9957	7.2425	6.9594	8.1377	7.7502	7.2227	8.138	8.1162
TC0X00010990.hg.1	SPANXC	SPANX family member C	0.631325	6.09537	0.00823244	6.6696	6.7504	6.331	6.2584	6.0458	5.7851	6.0958	5.809	5.4795	5.7291
TC1100008435.hg.1	RNF169	ring finger protein 169	-0.611048	7.09412	0.00823519	6.4586	6.6434	6.8993	6.9155	7.0261	7.8275	7.3199	7.2445	7.3676	7.2387
TC0700011710.hg.1	SLC25A40	solute carrier family 25 member 40	-0.792196	5.28203	0.00825415	4.7404	4.3321	4.7948	5.1831	5.3792	5.5431	5.4289	5.667	5.3887	6.3629
TC0X00007031.hg.1	DDX3X	DEAD-box helicase 3. X-linked	-0.783367	8.76468	0.00830973	8.8799	8.1419	8.4837	8.2415	8.118	9.2853	9.0666	8.4088	9.411	9.6101
TC1700010820.hg.1	SLC4A1	solute carrier family 4 member 1 (Diego blood group)	0.543782	5.38835	0.00831012	5.7683	5.8201	5.6065	5.6186	5.4879	5.2034	5.3242	5.1653	4.8539	5.0355
TC0200008945.hg.1	IL36G	interleukin 36. gamma	0.6052	4.63273	0.00833018	5.2835	5.1386	4.9642	4.6625	4.6278	4.2779	4.25	4.2344	4.2716	4.6167
TC1500009728.hg.1	DAPK2	death associated protein kinase 2	-1.05117	5.9045	0.00834478	5.2917	5.1581	5.5534	5.2502	5.6412	6.4501	6.9678	6.7985	6.9353	4.9989
TC1700006877.hg.1	ADPRM	ADP-ribose/CDP-alcohol diphosphatase. manganese dependent	-0.773261	4.33788	0.00842618	3.953	3.4575	3.8388	4.2666	4.2404	4.7778	4.4871	5.2148	4.1076	5.0353
TC1200009913.hg.1	YBX3	Y-box binding protein 3	-0.691102	8.82595	0.00846901	8.2865	8.2811	8.4451	8.5696	8.8196	8.6056	9.226	8.9839	9.4434	9.5986
TC0600011658.hg.1	ETV7	ETS variant 7	0.690152	5.03666	0.0084781	5.3461	5.2401	5.4947	5.2054	5.6224	5.4099	4.6722	4.3863	4.529	4.4605
TC1500007905.hg.1	ODF3L1	outer dense fiber of sperm tails 3 like 1	0.619439	5.01057	0.00847838	5.4842	5.5164	5.2623	5.1969	5.1416	4.8773	4.2697	4.9196	4.9644	4.4733
TC1100007826.hg.1	BEST1	bestrophin 1	-0.880698	5.25627	0.00849539	4.8229	4.2383	5.3872	4.2913	5.34	5.8486	5.3539	5.3604	5.6316	6.2886
TC1000010192.hg.1	KIAA1462	KIAA1462	-0.874213	4.67162	0.00853604	4.7081	3.6769	4.1633	4.0036	4.6207	4.5641	5.5026	4.6796	5.743	5.0544
TC0100009770.hg.1	NBPF12	neuroblastoma breakpoint family member 12	-0.823182	7.57019	0.00860309	7.3437	7.2786	6.7377	7.3091	7.124	8.9642	7.7009	7.8969	7.6108	7.7362
TC0900008910.hg.1	C9orf106	chromosome 9 open reading frame 106	0.727187	6.20034	0.00860941	6.9491	7.1584	6.3759	6.2182	6.118	6.0389	5.9499	5.9137	5.6944	5.5868
TC1800007186.hg.1	SETBP1	SET binding protein 1	-0.720307	8.13735	0.00868705	7.7212	7.6955	7.8882	7.7138	7.8672	8.8664	8.0647	8.2155	8.1845	9.1564
TC1900011988.hg.1	FAM83E	family with sequence similarity 83 member E	0.601337	6.64125	0.00868765	7.25	7.1096	7.0891	6.7331	6.5277	6.4747	6.3673	6.4221	6.1119	6.3269
TC1000008400.hg.1	IFIT1	interferon induced protein with tetratricopeptide repeats 1	1.39757	7.70136	0.00870255	8.043	8.4629	8.9076	7.2323	9.3549	7.7766	7.1509	6.6057	7.7986	5.681
TC1400010612.hg.1	PCNX4	pecanex homolog 4 (Drosophila)	-0.924215	6.27252	0.00874462	5.6308	5.0603	6.2431	5.8768	6.241	6.3636	7.001	7.3494	6.9385	6.0206
TC1100013005.hg.1	ZFP91	ZFP91 zinc finger protein	-0.547836	7.76925	0.00877478	7.5883	7.1679	7.5865	7.622	7.512	7.9249	7.9315	7.9919	8.0738	8.2937
TC2200008588.hg.1	APOL3	apolipoprotein L3	0.869424	6.04387	0.00883808	6.6296	7.055	6.4786	6.1906	6.0392	6.0423	6.2177	5.2881	5.591	4.9066
TC0100008127.hg.1	NASP	nuclear autoantigenic sperm protein	-0.679815	6.92277	0.00883933	6.7948	6.2803	6.6728	6.7921	6.3742	7.6566	7.3273	7.3634	6.6445	7.3217
TC1200010839.hg.1	ITGA5	integrin subunit alpha 5	-0.731306	7.11516	0.00890328	6.7075	6.4663	7.1074	6.4425	7.0238	7.1888	7.7482	6.912	7.7414	7.8136
TC1200006935.hg.1	ATF7IP	activating transcription factor 7 interacting protein	-0.679691	7.93822	0.00890659	7.3817	7.0057	7.7876	7.6977	8.1192	8.3428	8.2507	8.2303	8.4676	8.0989
TC0800007459.hg.1	POMK	protein-O-mannose kinase	-0.614212	6.66847	0.00906478	6.3256	6.5678	6.4296	6.4485	6.0353	7.1636	7.1475	6.545	6.7942	7.2276
TC1900010746.hg.1	EXOSC5	exosome component 5	0.581216	6.70909	0.0091008	7.1972	7.3176	6.6128	6.8995	6.9714	6.2631	6.6394	6.3886	6.4142	6.3871
TC0100017666.hg.1	ABCB10	ATP binding cassette subfamily B member 10	-0.812166	4.43264	0.0091118	3.4653	3.8164	4.1538	3.8874	4.81	5.0124	4.701	4.9272	4.3246	5.2284
TC0400008318.hg.1	TET2	tet methylcytosine dioxygenase 2	-0.868128	6.44459	0.00917834	5.7122	5.7232	6.1688	6.2796	6.1688	7.4538	6.9964	7.3608	6.6445	5.9378
TC0400008628.hg.1	SPRY1	sprouty RTK signaling antagonist 1	-0.960702	10.3764	0.0091963	10.3203	10.0048	10.2609	10.326	8.5681	11.0996	10.9025	10.8873	10.6247	10.7695
TC2200008703.hg.1	DDX17	DEAD-box helicase 17	-0.677858	10.1327	0.00925612	10.0347	9.9799	9.7448	9.5065	9.7033	11.0689	10.0291	10.3191	10.6137	10.3276
TC1100006529.hg.1	KRTAP5-6	keratin associated protein 5-6	0.695789	4.90377	0.00926429	5.2619	5.833	4.9876	5.1487	5.0271	4.9911	4.379	4.1268	4.6409	4.6416
TC0400012749.hg.1	FRG2	FSHD region gene 2	0.664406	4.59474	0.00928685	5.1542	5.4236	4.8124	4.7256	4.5189	4.3491	4.4833	4.4598	4.0324	3.9881
TC0500013248.hg.1	PCDHB15	protocadherin beta 15	-1.46076	5.58837	0.00931374	4.5408	4.8955	4.498	5.8206	4.535	4.3744	6.6211	7.4513	6.4065	6.7404
TC1900009828.hg.1	NDUFB7	NADH:ubiquinone oxidoreductase subunit B7	0.563006	7.51345	0.00934488	7.6976	7.7886	7.8471	7.7556	7.8859	6.9943	7.6731	7.2527	7.0331	7.2065
TC0X00007368.hg.1	TRO	trophinin	-0.751141	7.39531	0.00934524	6.3769	7.4473	7.1167	6.7339	7.424	8.2382	7.5385	7.563	7.7115	7.8031
TC1500010945.hg.1	LINS1	lines homolog 1	-0.856316	4.69656	0.00936631	4.3004	4.2545	4.1007	3.9024	4.7839	6.0638	4.8812	4.6695	5.2807	4.7285
TC0700011929.hg.1	SMURF1	SMAD specific E3 ubiquitin protein ligase 1	-0.712891	7.27236	0.00938376	6.871	6.556	6.8192	7.0323	7.301	7.5137	7.0966	7.4759	7.894	8.1639
TC0X00007977.hg.1	GPRASP1	G protein-coupled receptor associated sorting protein 1	-1.14301	5.55977	0.00946088	4.5557	4.4265	5.2087	5.2125	5.5379	6.3135	5.6443	6.8776	6.8939	4.9271
TC1500010072.hg.1	SIN3A	SIN3 transcription regulator family member A	-0.96921	7.82849	0.00948668	7.0548	6.3489	7.4901	7.4515	8.3741	8.482	7.8427	8.5721	8.368	8.3006
TC1700006643.hg.1	GLTPD2	glycolipid transfer protein domain containing 2	0.5033	6.42394	0.0095437	6.4648	6.7825	6.6148	6.6675	6.8484	6.0998	6.2006	6.2334	6.1668	6.1609
TC1100009521.hg.1	APLP2	amyloid beta precursor like protein 2	-0.99313	10.4617	0.0095512	9.1993	9.4199	10.5012	9.9538	10.7516	10.2104	11.211	11.4493	11.0113	10.9094
TC2200007974.hg.1	GSC2	goosecoid homeobox 2	0.635313	6.10698	0.00955683	6.612	6.7208	6.3974	6.3804	6.0125	5.341	5.8231	5.7279	5.9555	6.0992
TC0700007416.hg.1	RAMP3	receptor activity modifying protein 3	0.613328	6.92919	0.00957773	7.1946	7.155	7.6377	6.9888	7.2031	6.7497	6.7557	6.1782	6.5565	6.8725
TC1000007678.hg.1	MTRNR2L5	MT-RNR2-like 5	0.782657	5.48655	0.00959316	6.2452	6.3387	6.0631	5.7735	4.9688	5.2153	5.0742	5.2643	5.133	4.7893
TC1200006782.hg.1	CLEC9A	C-type lectin domain family 9 member A	0.600142	5.74122	0.00961124	6.178	6.0035	6.085	5.7385	6.2015	5.8412	5.213	5.1331	5.609	5.4095
TC0100015364.hg.1	TSPAN2	tetraspanin 2	0.818688	5.0796	0.00961389	6.0548	5.0746	5.933	4.8763	5.5059	4.8815	4.805	4.8877	4.7258	4.0513
TC0100008996.hg.1	ZNF326	zinc finger protein 326	-0.632523	5.84035	0.0096355	5.2147	5.5996	5.6761	5.5771	5.5529	6.7523	6.0357	6.1518	5.9861	5.8571
TC1700007559.hg.1	CCL11	C-C motif chemokine ligand 11	-0.950587	4.88332	0.00964945	4.6426	4.6514	4.6241	4.0613	4.0607	5.1042	6.356	5.7093	5.1275	4.496
TC1900007155.hg.1	MIR1199	microRNA 1199	0.582865	4.68143	0.0096516	5.1374	5.1865	4.9412	4.9386	4.6607	4.3806	4.4465	4.666	4.4539	4.0029
TC0400011791.hg.1	ANKRD50	ankyrin repeat domain 50	-0.783943	6.64962	0.00969471	6.2353	5.9974	6.6452	6.8089	5.6015	7.4619	7.0602	7.2384	6.6952	6.7523
TC0600008253.hg.1	PAQR8	progestin and adipoQ receptor family member 8	0.523862	6.76956	0.00972596	6.9336	7.0801	7.0753	7.0936	6.9748	6.485	6.1928	6.7364	6.5449	6.579
TC0600012764.hg.1	SEC63	SEC63 homolog. protein translocation regulator	-0.624784	8.35511	0.00974716	8.1783	7.8168	8.0562	8.4142	7.7481	8.7554	8.4464	8.324	8.8553	8.9564
TC0100008315.hg.1	PRPF38A	pre-mRNA processing factor 38A	-0.602979	7.16582	0.0097579	6.8525	6.6079	7.045	7.0465	6.7698	7.1294	7.532	7.9191	7.2913	7.4648
TC2000008750.hg.1	NANP	N-acetylneuraminic acid phosphatase	0.555711	6.13019	0.00977752	6.4197	6.8363	6.3538	6.3244	6.106	5.9364	5.8432	5.9019	5.7992	5.781
TC0900009606.hg.1	BNC2	basonuclin 2	-0.727381	7.95544	0.00984915	7.7765	7.2588	7.1775	7.9439	7.802	8.2738	7.763	8.19	8.6481	8.7207
TC1700010914.hg.1	ARL17B	ADP ribosylation factor like GTPase 17B	-0.89869	7.16063	0.00991884	6.0877	7.4126	7.0572	6.2009	6.7981	7.5415	7.0473	8.057	8.0667	7.3374
TC0500013349.hg.1	FBN2	fibrillin 2	-1.08873	5.61496	0.00992373	5.0727	5.945	5.3701	4.8683	4.0969	6.6869	5.5226	6.3586	5.4668	6.7617
TC0600011197.hg.1	ZNF184	zinc finger protein 184	-0.626366	5.653	0.00993993	5.1506	5.2095	5.1588	5.7777	5.4024	5.9817	5.8653	6.1126	5.5553	6.3159
TC1200007408.hg.1	TMEM117	transmembrane protein 117	-0.726899	6.65522	0.00997885	5.7385	6.5502	6.5486	6.3884	6.2332	6.6297	7.1363	7.127	6.6277	7.5727
TC1100011886.hg.1	RAB38	RAB38. member RAS oncogene family	1.4681	6.88293	0.0100659	7.8647	7.2406	7.8634	7.1924	7.9238	7.3945	4.4416	5.2972	7.1841	6.427
TC0900008969.hg.1	ABL1	ABL proto-oncogene 1. non-receptor tyrosine kinase	-0.540798	8.33815	0.0100753	7.961	7.8362	8.2437	8.1065	8.1914	8.3651	8.4678	8.6388	8.7803	8.7906
TC0100017471.hg.1	WDR26	WD repeat domain 26	-0.681646	8.0483	0.0100757	7.9792	7.5693	7.0752	7.9227	7.991	8.0893	8.6167	8.4335	8.1746	8.6316
TC1000008081.hg.1	KAT6B	lysine acetyltransferase 6B	-0.661484	7.2709	0.0101698	6.8076	6.4921	6.9234	7.0122	7.4655	7.7	7.2504	7.7474	7.4136	7.8968
TC0500012017.hg.1	IRF1	interferon regulatory factor 1	0.894073	7.06484	0.0101951	7.5847	7.3534	8.0893	6.9661	7.5659	7.279	6.406	5.7246	6.9564	6.7231
TC1600007819.hg.1	NKD1	naked cuticle homolog 1	0.755263	6.82968	0.0101966	7.299	7.4088	6.7098	7.2974	7.3215	7.1123	6.2317	6.1739	6.7954	5.947
TC0300013381.hg.1	CAMK2N2	calcium/calmodulin dependent protein kinase II inhibitor 2	0.635996	5.70662	0.0102368	6.0906	6.4381	5.7697	6.1427	5.6821	5.517	5.759	5.3731	5.2458	5.0481
TC0700007132.hg.1	FKBP9	FK506 binding protein 9	-0.793484	9.05442	0.010283	8.3185	8.4301	8.6633	8.8042	9.0722	8.9333	9.9285	10.1025	9.1884	9.1032
TC0100009433.hg.1	LOC643355	uncharacterized LOC643355	0.73624	6.44737	0.0103297	6.9764	7.304	6.4957	6.7995	6.5018	6.3206	6.6568	6.0283	5.7462	5.6443
TC0100017028.hg.1	PPP1R15B	protein phosphatase 1 regulatory subunit 15B	-0.656274	6.98149	0.0103457	6.8415	6.3813	6.6187	6.6307	6.7945	7.1883	7.2348	7.0375	7.0822	8.0054
TC0500012153.hg.1	FAM13B	family with sequence similarity 13 member B	-0.617147	6.49873	0.0103562	5.9077	5.9781	6.5742	6.4123	6.0785	7.2321	6.6396	6.7147	6.6301	6.82
TC1200007653.hg.1	NR4A1	nuclear receptor subfamily 4 group A member 1	-1.57282	9.48472	0.0103805	8.8323	9.0745	8.2302	9.6062	7.7483	11.3169	9.5288	8.5683	10.4825	11.4592
TC0100006550.hg.1	PRKCZ	protein kinase C zeta	1.18959	5.96447	0.010405	6.7142	5.8548	5.7421	7.6939	6.7913	6.4353	4.7152	5.0312	5.1156	5.5511
TC1600006550.hg.1	TMEM204	transmembrane protein 204	-0.757185	9.07761	0.0104818	8.5162	8.892	8.634	9.1514	8.3014	9.0896	10.1495	9.6872	9.0748	9.2799
TC0100010335.hg.1	USP21	ubiquitin specific peptidase 21	-0.985635	7.11944	0.0106628	6.5083	6.2702	5.8021	6.7113	7.8412	7.763	7.0896	7.722	7.5267	7.96
TC0500011408.hg.1	TMEM161B	transmembrane protein 161B	-0.779207	5.32585	0.0107301	4.5127	4.4491	5.0016	5.13	5.5879	6.043	5.5796	5.6479	5.2053	6.1014
TC0200015525.hg.1	DYTN	dystrotelin	0.735235	5.62089	0.010735	6.4001	6.5603	5.6094	5.6912	5.6814	5.6296	5.5263	5.0615	5.0105	5.0384
TC1600008986.hg.1	GNG13	G protein subunit gamma 13	0.601824	6.46147	0.0107439	7.1011	7.086	6.494	6.5962	6.5345	5.8988	6.1912	6.075	6.1873	6.4505
TC0900009018.hg.1	NTNG2	netrin G2	0.617282	6.52264	0.0107704	7.1476	7.0406	6.9877	6.4563	6.5241	6.3972	6.0706	5.9873	6.5024	6.1125
TC0800007809.hg.1	YTHDF3	YTH N6-methyladenosine RNA binding protein 3	-0.783418	8.45082	0.0108143	8.1851	7.4005	8.2282	8.0628	8.4189	8.5756	8.3466	8.6255	9.3153	9.3497
TC0700013626.hg.1	SLC37A3	solute carrier family 37 member 3	-0.659265	7.56174	0.01088	6.7467	7.0977	7.3817	7.1236	7.8109	8.0291	7.7443	8.0419	7.5895	8.0521
TC0200010907.hg.1	ACSL3	acyl-CoA synthetase long-chain family member 3	0.806202	8.02487	0.010945	7.8673	8.3503	8.8104	8.1841	8.9278	7.406	7.4076	7.3874	8.4287	7.4791
TC1700007519.hg.1	PSMD11	proteasome 26S subunit. non-ATPase 11	-0.760044	7.95435	0.0109956	7.1905	7.0602	7.6885	7.6439	8.2887	8.2009	7.9277	8.7278	8.258	8.5575
TC0100009742.hg.1	CD160	CD160 molecule	0.727692	4.68646	0.0110577	4.8145	4.7917	5.2445	5.0724	5.3284	4.7006	3.8579	3.7499	4.7485	4.5562
TC1200012651.hg.1	KIF5A	kinesin family member 5A	0.855844	4.59182	0.0111437	4.2003	4.7673	4.7727	5.84	5.5185	4.1006	4.1832	4.0736	4.5264	3.9357
TC0300009412.hg.1	SERPINI1	serpin family I member 1	1.81036	6.46796	0.0111593	6.8786	6.3975	7.5732	8.6703	7.3462	4.5336	5.462	5.7234	7.8929	4.202
TC0X00008945.hg.1	PRKX	protein kinase. X-linked	-0.703626	4.91056	0.0111673	4.1046	4.7541	4.5602	4.9737	4.401	4.8206	5.5751	5.6848	4.9099	5.3215
TC0100010532.hg.1	XCL1	X-C motif chemokine ligand 1	1.21618	5.64381	0.0112694	6.0116	5.9379	6.2726	6.7045	6.3329	6.6188	4.7521	4.0437	5.4737	4.2902
TC0600014215.hg.1	GMDS	GDP-mannose 4.6-dehydratase	0.627971	6.34933	0.0113198	7.0487	7.1475	6.3875	6.4393	6.2937	5.9459	6.0621	5.9472	6.0757	6.1458
TC1700007557.hg.1	CCL2	C-C motif chemokine ligand 2	-1.51152	7.7699	0.0114718	7.8871	7.2333	5.9883	7.1124	6.8496	9.2085	10.2018	7.4108	8.4173	7.3898
TC1500007009.hg.1	MGA	MGA. MAX dimerization protein	-0.489286	6.09058	0.0115046	5.8721	5.8392	5.8866	5.7396	5.8922	6.5256	6.2603	6.2954	6.4474	6.1474
TC1900009859.hg.1	BRD4	bromodomain containing 4	-0.699199	8.85285	0.0115216	8.1863	7.9092	8.4824	8.8838	9.0546	9.3116	9.0667	9.114	9.0474	9.4725
TC1700012437.hg.1	SRSF1	serine and arginine rich splicing factor 1	-0.528252	8.77075	0.0115436	8.2939	8.3839	8.5685	8.5609	8.726	9.093	8.772	8.9936	9.0228	9.293
TC2200007457.hg.1	EP300	E1A binding protein p300	-0.647308	7.5576	0.0116495	6.987	7.0167	7.6775	7.3598	7.1288	8.2825	7.7605	7.9205	8.0556	7.3873
TC0100016145.hg.1	CD244	CD244 molecule	0.592289	4.55432	0.0117199	5.1743	4.694	4.6833	4.516	5.1847	4.5403	4.2664	3.9978	4.2103	4.2761
TC1700009627.hg.1	YBX2	Y-box binding protein 2	0.521214	6.39558	0.0117515	6.8775	6.8321	6.573	6.4089	6.5894	6.3009	6.2244	6.1768	5.9623	6.0104
TC1200010591.hg.1	CCNT1	cyclin T1	-1.08739	6.3	0.0117733	5.966	4.5441	5.9359	5.9358	6.3998	6.5842	6.0235	6.8128	7.0067	7.7913
TC1900011688.hg.1	NDUFA13	NADH:ubiquinone oxidoreductase subunit A13	0.559522	7.86375	0.0117973	8.1348	8.2529	8.221	8.0017	8.1072	7.4202	8.1135	7.4584	7.4434	7.4845
TC1100007408.hg.1	PRDM11	PR/SET domain 11	-0.514916	5.8671	0.0118001	5.5424	5.3534	5.5788	5.7658	5.8078	6.3659	6.0349	6.0805	6.0305	6.1109
TC0400010745.hg.1	CLOCK	clock circadian regulator	-0.894454	5.9138	0.0118135	4.8053	5.2462	5.7267	6.4622	5.0925	6.5038	6.0042	6.1108	6.9261	6.2602
TC0100015952.hg.1	CLK2	CDC like kinase 2	-0.653069	7.18266	0.0118321	6.833	6.9265	6.2846	6.878	7.3585	7.73	7.1154	7.569	7.4621	7.6695
TC1100012812.hg.1	PRDM10	PR/SET domain 10	-0.604127	5.69897	0.0119419	5.0981	5.4399	5.5098	5.3949	5.5419	6.166	5.5628	6.3673	5.7194	6.1897
TC1200009903.hg.1	KLRC4-KLRK1	KLRC4-KLRK1 readthrough	0.919885	4.98116	0.0120193	5.5875	5.311	5.2203	5.5268	5.5598	5.4168	4.5591	3.8688	5.1021	3.6594
TC0900011396.hg.1	RAB14	RAB14. member RAS oncogene family	-0.604051	8.07699	0.0120507	7.5174	7.3523	7.9212	7.9781	8.1058	8.2117	8.2856	8.3993	8.2603	8.7382
TC2000007670.hg.1	SNAI1	snail family transcriptional repressor 1	-0.663888	5.57744	0.0121166	5.3903	5.4589	5.3753	5.1198	4.8831	5.9437	6.1893	6.1587	5.2051	6.0501
TC0500012822.hg.1	UBTD2	ubiquitin domain containing 2	-0.882872	6.48432	0.0121264	5.9676	5.5924	6.6634	5.6905	6.3004	6.3825	6.7099	6.6906	6.9232	7.9225
TC0400012179.hg.1	PLRG1	pleiotropic regulator 1	-0.742656	6.60311	0.0121714	5.8085	5.9955	6.5252	6.8652	5.9645	6.3744	7.0514	7.1407	7.3275	6.9782
TC0700009996.hg.1	C7orf50	chromosome 7 open reading frame 50	0.495908	7.50935	0.0121844	7.8483	7.5474	7.854	7.783	7.7539	7.4446	7.1046	7.369	7.2629	7.1259
TC0500008431.hg.1	DMXL1	Dmx like 1	-0.532587	6.3526	0.0121895	5.8553	6.3164	6.1369	6.2663	5.8566	6.7973	6.5777	6.7713	6.4995	6.4486
TC0600011287.hg.1	ZNF311	zinc finger protein 311	0.578536	5.56699	0.0122257	6.085	6.0236	5.8905	5.8696	5.4125	5.2352	5.3899	4.901	5.3695	5.4929
TC1400009912.hg.1	GALC	galactosylceramidase	-0.618673	6.25562	0.0122917	6.301	5.374	6.1416	5.9002	6.0146	6.2737	6.5721	6.7349	6.4533	6.7908
TC1100009171.hg.1	RNF214	ring finger protein 214	-0.55988	6.11316	0.0123198	5.7271	5.8116	5.9446	5.7602	5.9227	6.3485	6.0289	6.8374	6.5201	6.2306
TC1500010162.hg.1	RASGRF1	Ras protein specific guanine nucleotide releasing factor 1	0.545434	6.07785	0.0124741	6.3654	6.4196	6.2757	6.4842	6.2081	5.9221	6.0515	5.9862	5.6944	5.3715
TC1600010809.hg.1	TXNL4B	thioredoxin like 4B	-0.960883	5.53227	0.012554	4.9296	4.0912	5.7078	4.765	5.7656	6.4982	5.6187	5.9062	5.5717	6.4687
TC2200008885.hg.1	POLDIP3	DNA polymerase delta interacting protein 3	-0.628363	7.64358	0.012664	7.3734	6.9108	7.6344	7.3477	7.3807	7.635	7.8892	8.2725	8.3523	7.6398
TC0400012763.hg.1	S100P	S100 calcium binding protein P	0.535725	6.06923	0.0126767	6.6427	6.5742	6.1952	6.1631	6.1102	5.8628	5.7919	5.8987	5.879	5.5745
TC1100013007.hg.1	ZFP91-CNTF	ZFP91-CNTF readthrough (NMD candidate)	-0.525215	7.94859	0.0126858	7.6475	7.3479	7.7913	7.8284	7.8149	8.1795	8.0485	8.1787	8.1492	8.5001
TC0700012684.hg.1	AKR1B1	aldo-keto reductase family 1 member B	-0.702971	8.71754	0.0126891	7.8746	7.9897	8.4973	8.6187	8.8499	9.3787	9.4412	8.826	8.9804	8.7188
TC0100011920.hg.1	GALNT2	polypeptide N-acetylgalactosaminyltransferase 2	-1.05637	6.48048	0.0127534	5.9233	4.7549	6.2131	6.3317	6.5385	6.4273	6.8342	7.3595	6.5162	7.9061
TC1700012263.hg.1	DHX8	DEAH-box helicase 8	-0.614479	8.49791	0.0127633	7.8463	8.2043	8.0359	8.2006	8.6663	9.1733	8.7078	8.8799	8.4131	8.8516
TC1000012090.hg.1	IKZF5	IKAROS family zinc finger 5	-0.809973	5.96841	0.012808	5.5525	4.5745	5.7597	5.7555	6.1749	6.6965	6.005	6.1728	6.4022	6.5906
TC2000009997.hg.1	DUSP15	dual specificity phosphatase 15	0.6053	6.54606	0.0128436	6.5804	7.0469	7.0805	6.8143	6.7214	5.7505	6.3066	6.5482	6.5354	6.0764
TC0100018563.hg.1	LEFTY1	left-right determination factor 1	0.795725	7.38093	0.012849	7.4195	7.8378	7.4832	8.2825	7.871	7.299	6.4263	6.3759	7.2493	7.5647
TC1700011519.hg.1	HELZ	helicase with zinc finger	-0.768678	6.66553	0.0128939	6.0664	5.4739	6.2927	6.6576	6.9153	7.3727	6.859	7.2363	7.0335	6.7479
TC0100016676.hg.1	EDEM3	ER degradation enhancing alpha-mannosidase like protein 3	-0.657593	7.26587	0.0130585	7.2592	6.2407	7.0979	7.0585	7.0291	7.9129	7.2605	7.6404	7.4245	7.735
TC1300008688.hg.1	FOXO1	forkhead box O1	-0.623026	5.8767	0.013071	5.8285	5.3695	5.6719	5.4871	5.4689	5.882	6.0527	6.2488	5.9278	6.8296
TC2200009236.hg.1	GGT1	gamma-glutamyltransferase 1	0.63413	6.76634	0.0131089	7.2608	6.9085	7.4286	6.5843	7.2348	6.4065	6.4866	6.2617	6.9167	6.1748
TC0100008332.hg.1	ZYG11B	zyg-11 family member B. cell cycle regulator	-0.584179	7.07433	0.0131117	7.0554	6.7007	6.2751	7.0966	6.7834	7.316	7.1503	7.6123	7.3944	7.3591
TC0200012288.hg.1	HNRNPLL	heterogeneous nuclear ribonucleoprotein L like	-0.597121	6.03714	0.0131392	5.4463	5.4645	6.1331	5.8626	5.7864	6.0482	6.6291	6.229	6.1745	6.5977
TC1000006434.hg.1	ZMYND11	zinc finger MYND-type containing 11	-0.596326	8.18992	0.0131567	7.6797	7.8574	8.0483	7.8617	8.0116	7.9847	8.2585	8.7669	8.8431	8.5872
TC0600008099.hg.1	POLH	DNA polymerase eta	-0.587938	6.03338	0.0131864	5.4039	5.5998	5.7263	5.8323	6.1347	6.6493	5.9594	6.3113	6.2367	6.4801
TC0400006987.hg.1	LAP3	leucine aminopeptidase 3	0.868784	8.83808	0.0131955	9.1742	9.6316	9.6296	8.7007	9.2262	9.2494	8.6996	8.1359	8.3656	7.5679
TC0100015885.hg.1	GATAD2B	GATA zinc finger domain containing 2B	-0.740082	8.30372	0.0132198	7.5718	7.6489	7.4958	8.2532	8.6988	8.8575	8.5866	8.8347	8.2545	8.8355
TC0100014240.hg.1	GLIS1	GLIS family zinc finger 1	-0.70093	6.22783	0.0132671	5.6643	6.2468	5.6319	5.9488	5.895	7.2951	6.5217	6.0372	6.3217	6.7157
TC0400012178.hg.1	DCHS2	dachsous cadherin-related 2	-1.41414	6.95008	0.013317	5.4941	7.481	7.5157	6.0612	4.6631	7.9568	7.7316	7.553	6.9372	8.1072
TC1000012117.hg.1	CHST15	carbohydrate sulfotransferase 15	-0.590128	8.92325	0.013366	8.7104	8.3364	8.3779	8.9093	8.8068	9.062	9.5334	9.3349	9.349	8.8122
TC1900008057.hg.1	ZFP36	ZFP36 ring finger protein	-1.1491	9.86221	0.0134165	9.9683	9.6135	8.7622	9.3707	8.7236	10.8434	10.4218	9.6256	9.5664	11.7266
TC0800007080.hg.1	BNIP3L	BCL2 interacting protein 3 like	-0.79343	8.97398	0.0134904	8.5814	8.0058	8.6493	8.8402	8.8096	8.3862	9.7282	9.6808	9.551	9.5072
TC1700012353.hg.1	PER1	period circadian clock 1	-0.991987	8.18642	0.0135323	7.3069	7.7633	7.9228	7.9084	7.5508	9.2026	7.7759	8.8868	7.8572	9.6896
TC1100008904.hg.1	YAP1	Yes associated protein 1	-0.763974	6.93555	0.0135442	6.0982	6.2901	6.528	6.7876	7.064	6.6681	7.4897	7.2431	7.1935	7.9933
TC1100006899.hg.1	ARNTL	aryl hydrocarbon receptor nuclear translocator like	0.622838	6.83759	0.0135681	7.0508	6.8682	7.3888	7.0893	7.3479	6.4042	5.9914	6.6975	6.5323	7.0055
TC0800010258.hg.1	KAT6A	lysine acetyltransferase 6A	-0.674054	7.40427	0.0135909	6.7216	6.5377	7.6447	7.0633	7.3689	7.635	7.5108	7.9183	7.621	8.0214
TC1900011190.hg.1	IZUMO2	IZUMO family member 2	0.544683	4.71353	0.0136507	5.119	5.32	5.0083	4.6937	4.7883	4.7039	4.4446	4.5213	4.2937	4.2425
TC0700011642.hg.1	HGF	hepatocyte growth factor	-0.908258	4.46265	0.013733	4.2574	4.3214	3.4464	4.168	3.8493	5.9141	5.3481	4.7022	4.3386	4.281
TC1500007874.hg.1	C15orf39	chromosome 15 open reading frame 39	0.67949	6.51595	0.0138498	6.7822	6.9058	6.9473	6.7558	6.8874	6.5495	6.1803	5.8751	6.7683	5.5078
TC0700011968.hg.1	ZNF3	zinc finger protein 3	-0.604019	6.05113	0.0138672	5.3532	5.4479	5.9396	5.8508	6.1541	6.3172	6.3126	6.0138	6.5026	6.6195
TC0400010168.hg.1	LCORL	ligand dependent nuclear receptor corepressor like	-0.558686	7.5279	0.0138703	7.345	7.1379	7.1691	7.5983	6.9926	8.0855	8.0023	7.5158	7.6005	7.8322
TC0100015786.hg.1	POGZ	pogo transposable element with ZNF domain	-0.673129	8.79103	0.0138716	8.4315	8.5251	7.9885	8.3799	8.9473	9.594	8.7427	9.4228	9.0549	8.8236
TC0500009623.hg.1	PRR7	proline rich 7. synaptic	0.595405	6.325	0.01392	6.3531	7.1051	6.6048	6.7633	6.2871	6.1996	5.975	5.6804	6.2235	6.0579
TC1000007127.hg.1	WAC	WW domain containing adaptor with coiled-coil	-0.534643	10.0524	0.0139313	9.593	9.3973	9.9455	10.1252	9.8644	10.2326	10.3381	10.4316	10.2902	10.3062
TC0600007480.hg.1	HLA-F	major histocompatibility complex. class I. F	0.841299	9.64467	0.0139394	10.0441	9.8017	10.2208	10.0122	10.2478	10.0491	9.3865	8.2775	9.5957	8.8112
TC0100011378.hg.1	RASSF5	Ras association domain family member 5	1.07891	7.8861	0.0139703	8.4246	8.5909	8.2391	8.5375	8.3356	8.6007	7.1958	6.2803	8.0535	6.6029
TC0100007261.hg.1	CELA3B	chymotrypsin like elastase family member 3B	0.530611	6.15746	0.0139767	6.6181	6.7357	6.4273	6.3354	5.9974	5.9714	5.8281	5.8903	5.8328	5.9381
TC0400011732.hg.1	NDNF	neuron derived neurotrophic factor	-1.48212	5.98982	0.0140048	5.8012	5.6775	5.7064	4.6789	4.3798	7.9446	7.8867	6.9476	5.3255	5.55
TC1100012831.hg.1	ZBTB44	zinc finger and BTB domain containing 44	-0.645688	5.78242	0.0140306	5.2961	5.0814	5.7269	5.205	5.9885	6.3398	5.7321	6.1592	5.9266	6.3687
TC1700011210.hg.1	COIL	coilin	-0.595944	5.90359	0.0140544	5.3248	5.5913	5.5997	5.443	6.0692	5.9446	6.101	6.4757	5.9582	6.5284
TC0300012191.hg.1	PARP9	poly(ADP-ribose) polymerase family member 9	0.878018	8.30282	0.0140737	8.8034	8.3223	9.0994	8.1485	9.3356	8.0108	7.8808	7.5037	8.7109	7.213
TC1200007061.hg.1	CMAS	cytidine monophosphate N-acetylneuraminic acid synthetase	0.672991	6.42139	0.0142163	6.8619	6.2931	6.8593	6.9454	6.8297	5.6999	6.4067	6.6347	6.0503	5.6327
TC0300011391.hg.1	ADAMTS9	ADAM metallopeptidase with thrombospondin type 1 motif 9	-1.81623	4.08236	0.0143338	2.8466	2.8871	3.7542	2.5996	3.7838	3.5921	3.8819	3.991	6.0486	7.439
TC0900008250.hg.1	ZNF189	zinc finger protein 189	-0.740427	5.68465	0.0143502	5.6034	4.9422	5.2246	5.2721	5.53	6.8516	5.3714	5.8883	5.9845	6.1786
TC0500009562.hg.1	HRH2	histamine receptor H2	1.2956	4.43705	0.0143786	4.7741	4.239	6.1818	3.7281	6.5012	4.0688	3.7417	3.5685	3.8339	3.7333
TC1700007361.hg.1	TNFAIP1	TNF alpha induced protein 1	-0.635183	7.11641	0.0144435	6.4726	6.6097	6.8786	6.9095	7.1237	6.8617	7.2642	7.5912	7.8474	7.6055
TC0X00009262.hg.1	SUPT20HL2	SPT20 homolog. SAGA complex component-like 2	0.828605	7.3594	0.0145494	8.0683	8.192	7.6146	7.8154	7.1782	7.6211	7.3247	7.0928	6.27	6.417
TC1100011539.hg.1	NUMA1	nuclear mitotic apparatus protein 1	-0.566228	8.45833	0.0145919	7.9701	7.7937	8.2343	8.2254	8.6526	8.9389	8.5902	8.8725	8.6278	8.6778
TC0800009254.hg.1	ADCK5	aarF domain containing kinase 5	0.504663	6.83868	0.0145967	7.141	7.2307	7.1713	7.143	6.769	6.8667	6.4505	6.5789	6.4529	6.5828
TC0400012618.hg.1	CASP3	caspase 3	-0.767778	5.6606	0.0146158	5.5264	4.7933	5.4141	5.6901	4.9596	6.2978	5.6615	5.9066	5.5623	6.7943
TC1300007791.hg.1	IPO5	importin 5	-0.739525	7.56493	0.0146363	7.4399	6.3875	7.4378	7.5766	7.1341	7.8799	7.6461	7.941	7.6697	8.5366
TC1100012208.hg.1	CWF19L2	CWF19-like 2. cell cycle control (S. pombe)	-0.601456	5.4036	0.0147032	5.2744	4.9346	5.2042	5.3018	4.7994	5.7378	5.86	6.1632	5.5271	5.2335
TC2200009257.hg.1	TCN2	transcobalamin 2	1.0202	7.65105	0.0148678	8.3245	7.9455	8.1628	8.1075	8.2654	7.331	7.4036	6.2247	8.4529	6.2926
TC0500013010.hg.1	NHP2	NHP2 ribonucleoprotein	0.51114	7.47217	0.0148829	7.8447	8.1056	7.6549	7.4841	7.5494	7.2135	7.3278	7.0807	7.2285	7.2325
TC0600014143.hg.1	PHF3	PHD finger protein 3	-0.546632	8.75536	0.0149183	8.5287	8.2172	8.5074	8.7324	8.4244	9.4328	8.7294	8.9178	8.8998	9.1636
TC0900010052.hg.1	IGFBPL1	insulin like growth factor binding protein like 1	0.548805	5.3979	0.0149483	5.6865	5.7301	5.6178	5.9737	5.3533	5.5242	5.0734	4.9318	5.182	4.9061
TC0600013361.hg.1	CITED2	Cbp/p300 interacting transactivator with Glu/Asp rich carboxy-terminal domain 2	-0.657845	9.56236	0.0149546	9.3513	8.52	9.1937	9.472	9.6301	10.2898	9.6229	9.7517	9.9015	9.8905
TC0600014300.hg.1	GCLC	glutamate-cysteine ligase catalytic subunit	-0.783135	5.94985	0.0149723	5.1802	5.591	5.7739	5.8326	5.4137	6.0223	7.1481	6.8126	5.9313	5.7929
TC1100011182.hg.1	PYGM	phosphorylase. glycogen. muscle	1.57687	6.61901	0.0149819	7.9232	6.4561	6.7917	7.6015	8.2647	6.1492	4.984	4.1605	7.6608	6.1984
TC0100014226.hg.1	C1orf123	chromosome 1 open reading frame 123	-0.594579	9.50542	0.0150257	9.2889	9.2689	9.0548	9.5527	8.8754	9.7953	10.1304	10.0812	9.6438	9.3629
TC0100016337.hg.1	XCL2	X-C motif chemokine ligand 2	1.0698	5.10304	0.0150604	5.4281	5.5678	5.3925	6.3464	5.4549	5.7767	4.2984	3.7799	5.2374	3.7484
TC1900011904.hg.1	USHBP1	USH1 protein network component harmonin binding protein 1	0.519152	6.34138	0.0151457	6.8483	6.7388	6.4568	6.2348	6.7261	6.2012	6.201	6.0526	6.0851	5.8691
TC0400008620.hg.1	SPATA5	spermatogenesis associated 5	-0.933375	5.41076	0.0151486	5.1518	5.2989	4.5026	5.3306	4.4364	7.0941	5.772	5.7813	5.2779	5.462
TC0200006715.hg.1	PQLC3	PQ loop repeat containing 3	0.581461	7.66804	0.0151901	7.792	8.0404	7.9692	7.9581	8.0341	7.6336	7.7162	6.7842	7.5116	7.2408
TC0400011712.hg.1	PDE5A	phosphodiesterase 5A	-2.15285	6.01834	0.0152182	5.4733	5.5405	5.0891	4.4946	4.1121	5.9346	9.1422	9.1285	4.4409	6.8276
TC2000009759.hg.1	C20orf166-AS1	C20orf166 antisense RNA 1	0.611951	6.5187	0.0152263	6.9735	7.1853	6.8276	6.7365	6.4005	6.386	6.4333	6.4814	6.0405	5.7226
TC0100011148.hg.1	CAMSAP2	calmodulin regulated spectrin associated protein family member 2	-0.682396	7.04935	0.0152456	6.466	6.0224	7.0886	6.9616	7.0022	7.318	7.1907	7.1156	7.518	7.8105
TC1200008162.hg.1	CNOT2	CCR4-NOT transcription complex subunit 2	-0.623718	7.58548	0.0152724	7.1934	6.9615	6.8532	7.4651	7.8949	7.7834	7.8331	7.7132	8.0418	8.1151
TC0600011956.hg.1	ADGRF5	adhesion G protein-coupled receptor F5	-0.975368	6.41663	0.0152779	5.6594	6.1225	6.348	4.9656	6.5492	6.4961	7.0195	6.2009	7.8366	6.9683
TC1700009850.hg.1	PMP22	peripheral myelin protein 22	-0.894545	7.78718	0.0153128	8.0745	6.9975	6.6194	7.3169	7.6911	8.0214	8.3153	7.4719	8.3726	8.991
TC1400009214.hg.1	BMP4	bone morphogenetic protein 4	-1.94207	8.46624	0.0154325	5.8969	6.8013	9.5814	6.4895	8.707	8.3804	10.1396	9.9985	8.1	10.5678
TC0500012519.hg.1	SPARC	secreted protein acidic and cysteine rich	-0.610592	10.5282	0.0154653	10.2565	10.0068	10.2493	10.2522	10.3499	10.2582	11.2849	10.5636	10.9526	11.1083
TC1600009512.hg.1	NTAN1	N-terminal asparagine amidase	-0.598007	6.61805	0.0155286	6.165	5.8918	6.6224	6.5249	6.3911	6.5356	7.2361	7.0003	6.6812	7.1322
TC1100007056.hg.1	NELL1	neural EGFL like 1	1.39612	6.65901	0.0155677	7.285	8.1041	7.221	7.0816	7.0936	4.5706	6.4259	6.37	7.6596	4.7787
TC0500012826.hg.1	SH3PXD2B	SH3 and PX domains 2B	-0.542682	7.62514	0.0156084	7.6571	7.5085	7.5109	7.0336	7.0588	8.0201	8.0598	7.7295	7.7047	7.9682
TC1000009276.hg.1	DOCK1	dedicator of cytokinesis 1	-0.640768	6.17226	0.0156251	5.6892	5.2562	5.9936	5.8603	6.46	6.3248	6.4379	6.7536	6.3078	6.6392
TC1500006786.hg.1	SCG5	secretogranin V	1.29096	8.11331	0.0156731	8.8204	8.7845	9.0835	9.1517	7.9538	5.572	7.7384	7.714	8.6945	7.6202
TC1700009592.hg.1	MED31	mediator complex subunit 31	-0.723811	5.45506	0.0158639	5.4238	4.4759	5.1613	5.2703	5.1345	6.0595	5.6173	6.1466	5.0802	6.1812
TC0600009545.hg.1	PDE7B	phosphodiesterase 7B	-1.56271	7.57985	0.0158811	8.3791	6.5211	6.2275	7.6301	5.2347	8.4803	9.2976	9.2002	7.5293	7.2986
TC1900007012.hg.1	LDLR	low density lipoprotein receptor	-0.995352	8.50551	0.0159329	7.3017	8.1228	8.2745	8.0134	8.3268	8.2627	8.898	8.1632	9.8006	9.8914
TC1000009092.hg.1	INPP5F	inositol polyphosphate-5-phosphatase F	-0.671168	4.884	0.0159546	3.8788	4.4111	4.63	4.5823	5.2399	5.3424	5.1147	4.9275	5.406	5.3074
TC0600009019.hg.1	SOBP	sine oculis binding protein homolog	-0.654507	8.77888	0.0159767	8.159	8.126	8.561	8.8015	8.6106	8.9193	9.1763	9.6739	9.1969	8.5643
TC1200007514.hg.1	H1FNT	H1 histone family member N. testis specific	0.741758	5.47246	0.0160219	5.8839	6.4111	5.5834	5.9048	5.4335	5.5234	5.4596	5.3199	4.3632	4.8419
TC2000009994.hg.1	DEFB124	defensin beta 124	1.2686	7.64869	0.0160274	7.5163	8.7924	7.7737	9.4193	7.9133	6.0723	7.1235	8.0758	7.7369	6.0635
TC0800012396.hg.1	FBXO16	F-box protein 16	0.715357	5.14449	0.0160348	5.7815	5.7958	5.6299	5.2011	5.1026	5.4072	4.1015	4.6347	5.0305	4.7602
TC0400010167.hg.1	DCAF16	DDB1 and CUL4 associated factor 16	-0.625359	7.05074	0.0160391	6.3928	6.6787	7.4661	6.6592	6.4934	7.2058	7.1155	7.5112	7.5126	7.4719
TC0100012675.hg.1	ACOT7	acyl-CoA thioesterase 7	1.06953	7.08402	0.0160984	6.8667	7.6928	6.9536	8.9581	7.6227	5.9914	7.1998	6.7936	6.8153	5.9461
TC1700007171.hg.1	RNF112	ring finger protein 112	0.647503	6.45783	0.0161157	6.8329	7.0099	6.8154	6.864	6.3857	6.8073	5.6537	5.944	6.28	5.9854
TC1100011789.hg.1	FAM181B	family with sequence similarity 181 member B	0.63484	5.88181	0.0162192	6.5654	6.4375	6.1331	6.0549	5.8053	5.8517	5.9027	5.7055	5.0462	5.3157
TC1700010717.hg.1	STAT5B	signal transducer and activator of transcription 5B	-0.713579	7.5072	0.0162905	7.0958	6.514	7.5398	7.0945	7.5079	7.2898	7.7762	8.431	8.0035	7.8195
TC1700006710.hg.1	FBXO39	F-box protein 39	0.558684	4.65909	0.0164292	5.1398	5.3463	4.8359	4.783	4.5871	4.2922	4.2842	4.1292	4.5632	4.6299
TC1200012238.hg.1	ZCCHC8	zinc finger CCHC-type containing 8	-0.674945	7.65867	0.0164736	7.2818	6.8892	7.72	7.0564	7.6587	8.313	7.5653	7.8178	7.7816	8.503
TC1700012347.hg.1	GPS2	G protein pathway suppressor 2	-0.565491	7.87267	0.0165189	7.4663	7.6116	7.4118	7.6038	7.8562	7.9583	7.9926	8.6218	7.8115	8.3929
TC0400006596.hg.1	MSANTD1	Myb/SANT DNA binding domain containing 1	0.542765	5.36399	0.01659	5.5479	5.7239	5.9157	5.7637	5.2255	4.7949	5.1096	4.9617	5.3275	5.2693
TC0400008105.hg.1	HERC6	HECT and RLD domain containing E3 ubiquitin protein ligase family member 6	0.571732	7.54897	0.0166038	7.7253	7.9058	7.8038	7.6149	8.1243	7.7571	7.0488	6.9509	7.4677	7.0909
TC1200006438.hg.1	IQSEC3	IQ motif and Sec7 domain 3	0.552935	7.08782	0.0166045	7.6092	7.3468	7.0632	7.4205	7.3818	6.8812	6.6575	7.2301	6.8728	6.4153
TC0700013027.hg.1	RARRES2	retinoic acid receptor responder 2	0.875087	8.37272	0.0166716	9.0543	7.9819	8.5671	8.7712	9.6769	7.7132	7.9816	7.2349	8.3336	8.4125
TC1000011948.hg.1	PDZD8	PDZ domain containing 8	-0.806916	7.67083	0.016702	7.5126	6.1103	7.5013	7.5946	7.618	7.75	7.8443	8.1955	8.1364	8.4452
TC0300009944.hg.1	FAM43A	family with sequence similarity 43 member A	-0.637459	6.55882	0.016739	6.0959	5.6173	6.4513	6.4595	6.5765	6.3696	6.9789	6.9923	7.1096	6.9373
TC0400008345.hg.1	SGMS2	sphingomyelin synthase 2	1.21432	4.38303	0.0167427	4.7032	4.4293	6.1767	5.0441	4.5976	2.4255	3.4494	3.7496	4.9277	4.3272
TC0600008348.hg.1	ZNF451	zinc finger protein 451	-0.605759	7.6298	0.0167763	7.555	7.4492	7.0646	7.4866	7.0793	8.4576	7.5507	7.6556	7.832	8.1675
TC0300008654.hg.1	ROPN1B	rhophilin associated tail protein 1B	0.548832	5.1753	0.0168219	5.4014	5.8596	5.2684	5.4844	5.2349	4.8734	5.2273	5.0671	4.59	4.7465
TC0900012181.hg.1	NUP188	nucleoporin 188	-0.682604	6.29961	0.016896	6.406	5.6985	5.7756	6.0658	5.8457	6.7478	6.215	6.2441	6.6223	7.3753
TC1700010800.hg.1	MPP3	membrane palmitoylated protein 3	0.539042	6.19695	0.0168981	6.6246	6.8521	6.2572	6.3375	6.2609	6.167	5.9352	6.0778	5.6125	5.8447
TC0500013217.hg.1	COMMD10	COMM domain containing 10	-0.59152	5.53177	0.0169209	4.9901	4.9728	5.0944	5.308	5.8147	5.5579	6.1582	5.7747	5.6762	5.9706
TC0200016433.hg.1	TMEM178A	transmembrane protein 178A	-0.643518	4.59491	0.0169427	4.0203	4.9098	4.2123	4.3591	3.8643	5.2105	5.1959	4.9237	4.7123	4.5409
TC0300009500.hg.1	FNDC3B	fibronectin type III domain containing 3B	-0.581327	9.14528	0.0169495	8.8189	8.8303	8.8036	8.9795	8.8408	9.2781	9.567	8.9868	9.2929	10.0549
TC0700010936.hg.1	PURB	purine rich element binding protein B	-0.614158	5.97189	0.0169516	5.4438	5.7739	6.0748	5.1205	5.9112	6.0767	6.1807	6.2099	6.2118	6.7157
TC1200012105.hg.1	WSB2	WD repeat and SOCS box containing 2	-0.59041	8.2193	0.0170178	7.6579	7.5391	7.955	8.3678	8.1005	8.1619	8.4726	8.6687	8.4238	8.8455
TC0X00006723.hg.1	CDKL5	cyclin dependent kinase like 5	-1.03478	4.27943	0.0170532	3.2784	2.9632	4.2977	4.2342	4.0367	4.1552	4.7903	5.8995	5.1352	4.0038
TC0400011932.hg.1	ELF2	E74 like ETS transcription factor 2	-0.546371	6.99811	0.0170539	6.7882	6.4398	7.0732	6.6162	6.7072	7.5683	7.24	6.9627	7.0723	7.5132
TC0600013570.hg.1	ZBTB2	zinc finger and BTB domain containing 2	-0.636354	6.57337	0.0170782	5.8371	6.0751	6.6005	6.2162	6.5471	6.9157	6.5435	6.8442	6.6561	7.4983
TC1000009516.hg.1	DIP2C	disco interacting protein 2 homolog C	-0.61823	6.76244	0.017093	5.8501	6.2802	6.7158	6.7356	6.685	7.2793	6.691	6.9411	7.1332	7.3133
TC0200016332.hg.1	KIF1A	kinesin family member 1A	0.673052	6.74704	0.0171121	7.2814	7.8091	6.83	6.8848	6.6126	6.4996	6.5039	6.6778	6.3966	5.9747
TC0700013594.hg.1	TRIM4	tripartite motif containing 4	-0.513497	7.13039	0.0171187	6.8472	6.475	6.95	6.8238	7.2721	7.4533	7.4643	7.3214	7.2835	7.4132
TC1400009649.hg.1	NUMB	NUMB. endocytic adaptor protein	-0.80895	6.67951	0.0171263	6.007	5.7407	6.9456	5.656	7.0259	6.9159	7.1952	7.4383	7.1284	6.7421
TC0700007105.hg.1	ADCYAP1R1	ADCYAP receptor type I	-2.79867	5.91795	0.0171677	3.741	4.5723	5.0139	3.7124	5.5536	6.3803	10.3516	10.1579	5.1007	4.5959
TC0300010223.hg.1	PRRT3	proline rich transmembrane protein 3	0.722883	4.78021	0.0172063	5.7043	5.0233	4.7234	5.2323	5.0249	4.0069	4.0809	4.2443	5.2014	4.5603
TC1200010693.hg.1	TFCP2	transcription factor CP2	-0.57704	6.39731	0.0173635	5.7281	5.8547	6.0594	6.3083	6.5934	6.6658	6.3966	6.9839	6.6981	6.6848
TC0100015572.hg.1	SRGAP2B	SLIT-ROBO Rho GTPase activating protein 2B	-0.456929	7.3354	0.0174536	7.0136	7.2485	7.0231	7.1731	7.0764	7.5805	7.4627	7.4316	7.5498	7.7948
TC0900009279.hg.1	TOR4A	torsin family 4 member A	0.557548	7.46001	0.0175045	7.8915	7.9788	7.9349	7.3703	7.5183	6.7628	7.1909	7.2488	7.4662	7.2375
TC0700012224.hg.1	LAMB1	laminin subunit beta 1	-1.23533	8.37107	0.0175168	6.6054	7.2295	8.9477	7.7835	8.2009	8.8181	9.8793	9.3151	7.7034	9.2278
TC0X00008228.hg.1	DOCK11	dedicator of cytokinesis 11	-0.842936	4.91832	0.017545	4.9381	4.4374	3.9328	4.3931	4.7829	5.4868	6.2461	5.0456	4.4686	5.4518
TC0900006736.hg.1	CNTLN	centlein	-0.564054	5.67852	0.0175915	5.7776	5.4885	5.0563	5.1525	5.5076	6.0922	5.6291	6.309	5.9119	5.8606
TC1900006892.hg.1	ANGPTL4	angiopoietin like 4	0.598161	5.52561	0.0176218	5.9454	6.231	5.842	5.7511	5.3539	5.6096	5.4663	5.0056	4.8926	5.1586
TC1900007366.hg.1	MPV17L2	MPV17 mitochondrial inner membrane protein like 2	0.532822	8.76245	0.0177129	9.0745	8.8908	8.6268	9.2856	9.2666	8.6804	8.278	8.2927	8.6078	8.6214
TC1900011837.hg.1	UQCR11	ubiquinol-cytochrome c reductase. complex III subunit XI	0.535639	9.51925	0.0177982	9.8226	9.8973	9.5904	9.9836	9.6415	8.8785	9.7002	9.1763	9.3336	9.1686
TC1200010038.hg.1	EPS8	epidermal growth factor receptor pathway substrate 8	-0.668818	7.78317	0.0178087	7.5614	7.1621	7.4698	7.5937	7.4568	8.8915	8.1851	7.6614	7.6313	8.2187
TC1700007605.hg.1	C17orf50	chromosome 17 open reading frame 50	0.512417	7.17368	0.0178311	7.6704	7.5716	7.451	7.4623	6.9942	7.0936	7.0443	6.8224	6.9111	6.7161
TC0100007412.hg.1	MAN1C1	mannosidase alpha class 1C member 1	0.670844	6.85045	0.0179149	7.4425	6.9888	6.8213	7.9437	6.733	6.8022	6.5598	6.4481	6.224	6.5411
TC0500009192.hg.1	SGCD	sarcoglycan delta	-0.624676	9.05521	0.0179223	8.5035	8.4475	9.0932	8.8418	8.8284	8.8161	9.3152	9.9467	9.4116	9.3482
TC1900008279.hg.1	BCL3	B-cell CLL/lymphoma 3	0.625572	7.18952	0.0179399	6.9887	7.636	7.6869	7.1003	8.0997	6.9526	6.7233	6.7929	6.798	7.1169
TC0400010205.hg.1	KCNIP4	potassium voltage-gated channel interacting protein 4	1.43286	3.99396	0.0179407	5.4861	5.115	3.8618	6.0428	3.0462	4.5373	3.2609	2.7313	2.7334	3.1247
TC0900007106.hg.1	LINC00961	long intergenic non-protein coding RNA 961	0.548823	6.50272	0.017965	7.0174	6.8964	6.721	6.8175	6.4333	6.5887	6.3936	6.3029	5.9524	5.9039
TC0800007209.hg.1	WRN	Werner syndrome RecQ like helicase	-0.89257	4.68512	0.0179879	4.0253	3.2141	4.7772	4.1998	4.9778	5.4591	4.5449	4.9462	5.0359	5.6708
TC1700010497.hg.1	SYNRG	synergin gamma	-0.556703	7.87379	0.0180316	7.3278	7.8793	7.1671	7.6728	7.9301	8.3599	7.9067	8.085	8.2829	8.1263
TC0500008653.hg.1	UQCRQ	ubiquinol-cytochrome c reductase complex III subunit VII	0.596349	8.87292	0.0180676	9.2943	9.247	8.9504	9.3209	9.0428	8.3647	8.9497	7.9955	8.9653	8.5985
TC0200016750.hg.1	NFE2L2	nuclear factor. erythroid 2 like 2	-0.486301	8.61488	0.0180782	8.2291	8.2057	8.4304	8.5126	8.4808	8.6612	8.9458	9.0992	8.9664	8.6176
TC0500012611.hg.1	CLINT1	clathrin interactor 1	-0.598605	7.08041	0.0181131	6.7018	6.9016	6.3271	6.5643	7.4107	7.1282	7.5521	7.5381	7.2963	7.3839
TC1100012162.hg.1	CASP12	caspase 12 (gene/pseudogene)	-0.64669	5.32479	0.018189	4.505	4.8654	5.351	4.863	5.4229	5.4912	5.9332	5.8201	5.1121	5.884
TC0X00011336.hg.1	IL9R	interleukin 9 receptor	0.552183	6.1125	0.0181969	6.4144	6.7016	6.45	6.3279	6.049	5.9202	6.0389	5.8699	6.0232	5.3298
TC0Y00007332.hg.1	IL9R	interleukin 9 receptor	0.552183	6.1125	0.0181969	6.4144	6.7016	6.45	6.3279	6.049	5.9202	6.0389	5.8699	6.0232	5.3298
TC1100012495.hg.1	DDX6	DEAD-box helicase 6	-0.546429	8.41194	0.0182272	8.407	8.2061	7.9697	8.2519	7.859	8.4347	8.5966	8.4205	8.8974	9.0766
TC1900009350.hg.1	PLIN4	perilipin 4	0.553306	5.60309	0.0182429	6.001	6.1359	5.8982	5.8159	5.5477	5.1224	5.1796	5.8442	5.3629	5.1231
TC0300009122.hg.1	CPA3	carboxypeptidase A3	-1.78517	4.17726	0.0182491	3.5236	3.5859	3.367	3.3645	2.5823	6.9354	6.8564	3.1637	3.5543	4.8395
TC1000009452.hg.1	VENTX	VENT homeobox	0.480462	6.48946	0.0182687	6.7512	7.0013	6.5908	6.7906	6.5146	6.0344	6.2966	6.4427	6.2948	6.1777
TC1300006987.hg.1	DGKH	diacylglycerol kinase eta	-0.90419	6.29777	0.0182822	5.7783	6.0756	5.909	5.917	5.5483	7.473	6.8025	5.8582	5.9859	7.6297
TC1000007703.hg.1	BICC1	BicC family RNA binding protein 1	-0.713108	7.747	0.018341	6.7567	6.8804	7.8487	7.6278	7.8386	8.0623	7.8896	7.7685	8.3461	8.4513
TC0300007437.hg.1	MANF	mesencephalic astrocyte derived neurotrophic factor	0.604325	5.61731	0.0184274	6.1615	6.3722	5.9825	5.7671	5.314	4.972	5.5324	5.429	5.3448	5.2975
TC1200012708.hg.1	OAS1	2'-5'-oligoadenylate synthetase 1	1.86744	6.96963	0.0184331	7.838	7.5689	8.664	5.7846	9.6612	7.9235	5.6187	5.0228	6.6896	4.9249
TC0500011095.hg.1	MRPS27	mitochondrial ribosomal protein S27	-0.662972	5.73528	0.018512	5.2138	4.8662	5.0688	5.8423	6.0278	5.9557	5.8938	6.3937	6.066	6.0247
TC0600008780.hg.1	CASP8AP2	caspase 8 associated protein 2	-0.689397	5.32318	0.0185232	5.3243	4.4196	5.0925	4.9194	5.1366	5.8181	5.6482	6.3634	5.191	5.3188
TC2200007114.hg.1	YWHAH	tyrosine 3-monooxygenase/tryptophan 5-monooxygenase activation protein eta	-0.592575	9.11103	0.018525	8.386	8.8907	9.1863	9.013	8.5978	9.2669	9.4985	8.9734	9.5263	9.7716
TC1100007366.hg.1	TTC17	tetratricopeptide repeat domain 17	-0.613811	7.32116	0.0186113	7.1362	7.1693	6.9445	6.6533	7.1679	7.9513	7.2266	7.5527	7.2502	8.1595
TC0900007115.hg.1	GLIPR2	GLI pathogenesis related 2	0.834621	7.84398	0.0186938	7.8968	7.8625	9.011	8.0613	8.4748	7.5576	8.0325	6.4448	7.4888	7.6096
TC0300013337.hg.1	MCF2L2	MCF.2 cell line derived transforming sequence-like 2	0.638752	6.03464	0.0187438	5.8617	6.8703	6.0784	6.6132	6.3465	5.6819	5.3031	5.6003	6.1456	5.8455
TC0700013190.hg.1	SHH	sonic hedgehog	0.64643	4.6594	0.0187603	5.0919	5.8214	4.6014	4.711	4.6874	4.4254	4.2233	4.4642	4.1867	4.3814
TC0400012670.hg.1	FAT1	FAT atypical cadherin 1	-0.988213	8.08031	0.0187923	6.4458	7.4302	8.0307	8.5674	7.4569	8.9731	8.5755	8.8223	7.6797	8.8215
TC0200008554.hg.1	COX5B	cytochrome c oxidase subunit 5B	0.526918	7.5717	0.0187965	7.8063	7.8333	7.6146	7.8609	8.0606	7.1846	7.6888	6.932	7.522	7.2138
TC1900007795.hg.1	LSM14A	LSM14A. mRNA processing body assembly factor	-0.554006	7.25052	0.0189053	6.8702	6.7605	7.2291	7.0458	6.962	7.1991	7.4177	7.5787	7.3556	8.0866
TC1600008015.hg.1	LOC388282	uncharacterized LOC388282	0.508604	4.83542	0.0189415	5.0094	5.4731	5.2057	4.7777	4.9828	4.3962	4.4449	4.6757	4.6143	4.7745
TC1500009348.hg.1	FBN1	fibrillin 1	-0.83163	8.95312	0.0189814	8.5626	8.4747	8.7469	8.7522	8.1502	9.2154	10.5011	9.5178	9.0435	8.5668
TC0X00008785.hg.1	BGN	biglycan	-1.25965	10.4228	0.0190248	10.0094	10.4558	8.4688	10.3115	9.7194	10.6144	12.4564	11.638	10.0264	10.528
TC0400011313.hg.1	SNCA	synuclein alpha	-1.03676	6.01771	0.0190317	5.6354	5.8831	5.2078	5.4875	5.2829	6.3889	7.5602	7.4938	5.4197	5.8178
TC1500009926.hg.1	LARP6	La ribonucleoprotein domain family member 6	0.542589	7.11822	0.0190439	7.3102	7.5957	7.4169	7.4	7.2248	6.9142	7.3103	6.8796	6.7692	6.3612
TC1200012043.hg.1	MED13L	mediator complex subunit 13 like	-0.606638	8.41236	0.0190474	7.9943	7.5266	8.4479	8.1635	8.4129	9.0823	8.3583	8.6359	8.6155	8.8864
TC0400007245.hg.1	TBC1D1	TBC1 domain family member 1	0.541226	6.62642	0.0191662	7.1512	6.9185	7.1749	6.6178	6.6228	6.155	6.6102	6.0451	6.5372	6.4315
TC2000007386.hg.1	PLCG1	phospholipase C gamma 1	-0.607253	5.88532	0.0191761	5.4297	5.6085	5.2719	5.7342	5.8643	6.0127	6.3727	6.7552	6.1313	5.673
TC1300008573.hg.1	STARD13	StAR related lipid transfer domain containing 13	-0.746665	5.7786	0.0191845	5.003	4.9744	5.8235	5.675	5.5504	6.4833	6.2566	6.7936	5.6102	5.6159
TC1200008322.hg.1	TMTC2	transmembrane and tetratricopeptide repeat containing 2	-1.01814	7.30061	0.0193631	5.8903	6.1784	7.5463	7.1581	7.1846	7.3295	7.7182	7.8074	7.2432	8.9501
TC0100011695.hg.1	BROX	BRO1 domain and CAAX motif containing	-0.742628	7.35589	0.0193955	6.7122	6.4889	6.5622	7.4004	7.7592	7.5979	7.3353	7.5726	7.9664	8.1638
TC1800009056.hg.1	ZADH2	zinc binding alcohol dehydrogenase domain containing 2	-0.640956	5.86822	0.0194102	5.7457	5.269	5.5207	5.2864	5.917	6.0909	6.7145	5.9454	5.6537	6.539
TC0100015594.hg.1	ITGA10	integrin subunit alpha 10	-0.650279	6.77787	0.0195375	6.6173	6.8464	5.9008	6.4863	6.4129	7.2003	7.7314	6.9181	7.0085	6.6567
TC0900011256.hg.1	RNF183	ring finger protein 183	0.543067	6.46314	0.0196464	7.0314	6.894	6.4261	6.8563	6.4656	6.3545	6.3725	5.7524	6.2906	6.1881
TC0700012734.hg.1	CREB3L2	cAMP responsive element binding protein 3 like 2	-0.706333	8.95957	0.0196794	8.1539	8.5267	8.6746	8.8581	8.8187	9.2905	9.3114	8.856	8.9051	10.2007
TC0400012940.hg.1	SEC31A	SEC31 homolog A. COPII coat complex component	-0.592436	8.91794	0.0196955	8.4636	8.3862	8.713	9.1728	8.3731	8.8655	9.3856	9.1805	9.6245	9.0147
TC0X00011403.hg.1	SPANXD	SPANX family member D	0.553269	5.95105	0.019831	6.5603	6.665	6.0567	6.0572	5.7992	5.6509	5.8747	5.6258	5.5131	5.7076
TC0700009174.hg.1	MKLN1	muskelin 1	-0.504997	7.70451	0.0198457	7.4664	7.2802	7.5964	7.5352	7.3817	8.353	7.9377	7.9838	7.9541	7.5565
TC1000008388.hg.1	FAS	Fas cell surface death receptor	0.531053	6.78039	0.0198461	7.0796	6.8871	7.3641	7.0912	6.8076	6.9425	6.3552	6.1891	6.5156	6.5719
TC1600008011.hg.1	KATNB1	katanin regulatory subunit B1	0.539341	7.00725	0.0198543	7.7201	7.5177	6.9438	7.2849	6.9181	6.5653	6.802	6.7045	6.7538	6.8623
TC1800006487.hg.1	SMCHD1	structural maintenance of chromosomes flexible hinge domain containing 1	-0.679249	6.93313	0.0198564	6.4136	6.0256	6.5568	6.762	7.2096	7.687	7.2168	7.1559	6.7381	7.566
TC0600014177.hg.1	DSE	dermatan sulfate epimerase	-0.678879	6.61025	0.0199478	6.358	5.6522	6.443	6.3352	6.5657	6.2513	6.9814	7.3481	6.8274	7.3402
TC1300008342.hg.1	C1QTNF9B	C1q and tumor necrosis factor related protein 9B	0.449955	7.208	0.0199557	7.4797	7.5572	7.3826	7.4241	7.3213	7.2258	7.0539	6.9025	6.7883	6.9446
TC0700008375.hg.1	PPP1R9A	protein phosphatase 1 regulatory subunit 9A	-0.74937	5.9008	0.0199784	6.2154	5.6341	5.5135	5.7817	4.4859	6.5036	6.0513	6.1178	6.2649	6.4398
TC0X00008798.hg.1	SSR4	signal sequence receptor subunit 4	0.637518	8.65523	0.0200141	9.6053	8.3279	8.8672	9.0389	9.0306	8.4013	8.5351	7.9431	8.5382	8.2646
TC0100018484.hg.1	MCL1	BCL2 family apoptosis regulator	-0.789499	9.42807	0.020036	9.2994	8.9684	8.8968	8.9752	9.0269	9.5529	9.7126	9.1403	9.6974	11.0108
TC1700011237.hg.1	VEZF1	vascular endothelial zinc finger 1	-0.615249	8.3416	0.0200519	7.6588	7.7216	8.1408	8.1836	8.4651	8.3387	8.6102	9.1006	8.2921	8.9046
TC0600010121.hg.1	QKI	QKI. KH domain containing RNA binding	-0.522275	9.86759	0.0200527	9.5349	9.2885	9.7664	9.6503	9.7921	10.0306	9.8731	9.9753	10.1931	10.5716
TC1400010725.hg.1	MDP1	magnesium dependent phosphatase 1	-0.610767	4.88442	0.0200748	4.3432	5.0902	4.4608	4.7057	4.2953	4.907	5.7672	4.9108	5.2502	5.1138
TC2000007572.hg.1	NCOA3	nuclear receptor coactivator 3	-0.542924	7.96198	0.0201143	7.4716	7.5092	7.7467	7.6015	8.1235	8.6641	8.0218	8.3315	8.0842	8.0656
TC0800012410.hg.1	WHSC1L1	Wolf-Hirschhorn syndrome candidate 1-like 1	-0.514962	9.17591	0.0201685	8.6338	9.0925	8.81	8.8323	9.2235	9.726	9.2313	9.397	9.2036	9.6091
TC0200016430.hg.1	MORN2	MORN repeat containing 2	0.631611	5.14981	0.0201862	5.3347	5.6001	5.1919	6.0291	5.1724	4.4355	5.4344	4.8004	4.7866	4.7132
TC0700012427.hg.1	FAM3C	family with sequence similarity 3 member C	-0.601624	8.27057	0.02019	8.2677	7.5166	8.0797	8.1073	7.8774	8.0563	8.8952	8.5077	8.4339	8.9639
TC0600008247.hg.1	IL17A	interleukin 17A	0.537077	4.97614	0.0201971	5.4374	5.7478	4.977	4.8882	5.173	4.6449	4.6214	4.8144	4.8404	4.617
TC1700009748.hg.1	SCO1	SCO1. cytochrome c oxidase assembly protein	-0.468985	6.92438	0.0202578	6.713	6.7572	6.8679	6.3148	6.7966	7.077	7.0779	7.1241	7.2037	7.3116
TC1900008824.hg.1	MYADM	myeloid associated differentiation marker	-0.743916	10.1042	0.0203339	9.0723	9.327	9.9909	9.8387	10.4326	10.7929	10.3374	10.0338	10.2547	10.9623
TC0400007447.hg.1	SLAIN2	SLAIN motif family member 2	-0.5467	9.34107	0.0203749	8.9271	8.8307	9.2783	9.4578	8.8448	9.5239	9.512	9.965	9.78	9.2913
TC0700012555.hg.1	TNPO3	transportin 3	-0.670508	7.67101	0.0203978	6.9804	6.8784	7.1793	7.8314	7.8092	7.6448	7.9615	8.4622	8.2274	7.7354
TC0600008262.hg.1	TMEM14A	transmembrane protein 14A	0.706652	5.65989	0.020413	5.8648	6.1763	6.1817	5.9663	5.8769	5.0034	5.8027	4.4072	5.7803	5.5392
TC0700013629.hg.1	BRAF	B-Raf proto-oncogene. serine/threonine kinase	-0.5066	7.33882	0.0204272	7.0482	6.7275	7.1164	7.2871	7.2485	7.9082	7.3377	7.6496	7.653	7.4122
TC0700010760.hg.1	ELMO1	engulfment and cell motility 1	-0.642224	6.74072	0.0204297	6.2952	6.3208	6.2753	6.3198	6.887	7.0888	7.4236	7.2548	7.2758	6.2661
TC0100016163.hg.1	ADAMTS4	ADAM metallopeptidase with thrombospondin type 1 motif 4	-1.36466	6.09416	0.0204398	5.111	4.618	6.1283	5.4121	5.7897	6.5579	5.9994	5.2015	7.9749	8.1486
TC1000007199.hg.1	ZEB1	zinc finger E-box binding homeobox 1	-0.625671	9.81257	0.020466	9.4925	8.9704	9.6501	10.1292	9.2565	10.1836	10.4397	10.255	9.9822	9.7665
TC1600011501.hg.1	NPIPB3	nuclear pore complex interacting protein family member B3	-0.870409	8.0175	0.0205323	7.2558	8.3774	7.2786	7.4198	7.5799	9.6511	8.1616	8.1583	7.9559	8.3366
TC0100013049.hg.1	NBPF1	neuroblastoma breakpoint family member 1	-0.746662	7.69291	0.020559	7.3678	7.5978	6.9655	7.6079	7.059	8.8588	7.7947	8.5273	7.7281	7.4224
TC0800012180.hg.1	PARP10	poly(ADP-ribose) polymerase family member 10	0.620038	6.71428	0.0207252	6.879	6.6558	7.0005	6.8994	7.6869	6.7585	6.2651	6.1251	6.7244	6.1482
TC0200008971.hg.1	CBWD2	COBW domain containing 2	-0.466486	6.9164	0.0207318	6.6529	6.6566	6.6528	6.8372	6.6163	6.8832	7.3423	7.0751	7.0343	7.4133
TC1400008636.hg.1	METTL3	methyltransferase like 3	-0.560964	6.16023	0.0208386	5.6366	5.9927	5.9742	5.5466	6.2486	6.0556	6.318	6.7543	6.7293	6.3463
TC1900007888.hg.1	APLP1	amyloid beta precursor like protein 1	0.539104	7.85416	0.0208531	8.0108	8.3206	8.1986	8.2031	7.8854	7.8929	7.2475	7.6559	7.9062	7.2205
TC2100008233.hg.1	ZBTB21	zinc finger and BTB domain containing 21	-0.77768	7.17851	0.0208577	5.8414	6.8324	7.4103	6.6317	7.2326	7.4421	7.0359	7.811	7.9798	7.5679
TC1400007404.hg.1	RHOJ	ras homolog family member J	-0.875065	7.78612	0.0210272	6.948	6.6146	7.7265	7.39	8.0638	7.6758	8.6066	8.3307	8.9532	7.552
TC1400007443.hg.1	HSPA2	heat shock protein family A (Hsp70) member 2	-1.3774	7.34904	0.0210532	6.4867	6.4498	6.5992	6.8221	6.9439	6.9286	9.0341	9.916	7.7027	6.6073
TC0500009762.hg.1	TRIM41	tripartite motif containing 41	-0.445076	6.64449	0.0210657	6.232	6.3244	6.4651	6.5253	6.563	6.8489	6.7069	7.04	6.9345	6.8049
TC1200011099.hg.1	GNS	glucosamine (N-acetyl)-6-sulfatase	-0.571453	9.93409	0.0210666	9.5244	9.1433	9.8326	9.8167	9.9249	9.8951	9.9406	10.49	10.2809	10.4925
TC1700009394.hg.1	PRPF8	pre-mRNA processing factor 8	-0.749715	8.58018	0.0210918	7.982	7.4351	8.5279	8.3276	8.754	9.503	8.3523	9.1869	8.7062	9.0267
TC0900012272.hg.1	RC3H2	ring finger and CCCH-type domains 2	-0.569173	7.72456	0.0211259	7.3201	7.0428	7.6669	7.6007	7.5693	8.1225	7.4927	7.8467	8.2675	8.3163
TC1600011505.hg.1	NPIPB4	nuclear pore complex interacting protein family member B4	-0.759593	8.4608	0.021203	7.8872	8.2887	7.7346	8.2105	8.284	9.9141	8.5493	8.2635	8.5469	8.929
TC0800009331.hg.1	ERICH1	glutamate rich 1	-0.501268	6.42647	0.021263	5.8859	6.015	6.3135	6.1109	6.5538	6.6705	6.8995	6.7607	6.4313	6.6235
TC0500013384.hg.1	PPP2R2B	protein phosphatase 2 regulatory subunit Bbeta	1.55176	5.58231	0.0212878	6.8104	5.9347	7.9953	4.7746	6.276	4.9906	4.5247	4.5615	6.5145	3.4407
TC0X00009611.hg.1	SLC38A5	solute carrier family 38 member 5	-1.59233	6.75382	0.0213498	5.5752	5.2307	6.9407	6.5517	5.49	9.475	8.4289	6.143	7.718	5.9849
TC0300009799.hg.1	RTP4	receptor transporter protein 4	0.614335	5.28192	0.0213628	5.6777	5.4778	5.4551	5.0353	6.2996	5.0978	5.1168	4.8647	5.1004	4.694
TC0400009431.hg.1	TENM3	teneurin transmembrane protein 3	0.581687	4.80552	0.0213977	5.595	5.3807	4.7029	5.0725	4.7308	4.4395	4.3655	4.3739	4.8923	4.5021
TC1600010561.hg.1	CDH11	cadherin 11	-0.518809	9.41141	0.0215464	9.4548	8.8772	9.1608	8.9533	9.314	9.6898	9.432	9.6367	10.083	9.5125
TC1000006904.hg.1	STAM	signal transducing adaptor molecule	-0.590568	6.62764	0.0215629	6.1611	5.9093	6.3834	6.5557	6.6523	7.1057	7.1667	6.3173	6.9023	7.1226
TC0100014210.hg.1	COA7	cytochrome c oxidase assembly factor 7 (putative)	-0.582576	4.99723	0.0216124	4.7805	4.1392	4.7537	5.1891	4.6672	5.5875	4.9775	5.4992	5.2447	5.1337
TC0700010336.hg.1	MEOX2	mesenchyme homeobox 2	-1.14057	6.558	0.0216739	6.0831	6.6503	5.5053	6.0556	5.6443	7.6032	7.228	8.2983	7.1059	5.4059
TC1100009237.hg.1	VPS11	VPS11. CORVET/HOPS core subunit	-0.624354	7.51512	0.0217045	6.7213	6.9535	7.4154	6.9949	7.9296	7.6496	7.6404	7.8919	8.1108	7.8437
TC0100011797.hg.1	STUM	stum. mechanosensory transduction mediator homolog	0.557578	7.67696	0.021808	8.3517	8.0109	7.6705	7.8853	7.8604	7.4914	7.0466	7.0957	7.8438	7.5134
TSUnmapped00000821.hg.1	DUX5	double homeobox 5	0.527556	5.03189	0.0218342	5.4182	5.4346	5.4041	5.4472	4.7742	5.1319	4.6453	4.8235	4.6472	4.5927
TC1700007478.hg.1	NF1	neurofibromin 1	-0.623033	7.73753	0.0218522	7.269	6.9678	7.6284	7.2758	7.989	8.1901	7.5167	7.9361	8.3236	8.2787
TC2200007013.hg.1	EWSR1	EWS RNA binding protein 1	-0.524501	7.92743	0.0219527	7.7194	8.0656	7.4574	7.5591	7.5244	8.6347	7.9079	8.125	8.1556	8.1252
TC1000011988.hg.1	EIF3A	eukaryotic translation initiation factor 3 subunit A	-0.506425	8.94701	0.0219571	8.963	8.2734	8.5725	9.0479	8.6122	9.3219	9.132	9.127	9.1238	9.2964
TC0200011097.hg.1	ALPPL2	alkaline phosphatase. placental like 2	0.667176	5.3893	0.0219854	6.1171	5.9115	5.6495	5.8935	5.0429	5.5253	5.2769	5.1669	4.5067	4.8028
TC0100017223.hg.1	LPGAT1	lysophosphatidylglycerol acyltransferase 1	-0.626951	5.58993	0.0221412	5.363	5.1393	4.9489	5.1733	5.7577	5.8106	6.188	5.2387	5.9484	6.3314
TC0X00011184.hg.1	IRAK1	interleukin 1 receptor associated kinase 1	0.546004	6.78281	0.0221599	7.4072	7.2303	6.9202	7.2155	6.5058	6.6571	6.5643	6.6994	6.3441	6.284
TC0400012947.hg.1	GPRIN3	GPRIN family member 3	-1.00452	4.91248	0.0221818	4.5097	4.543	4.0516	4.487	4.4598	6.3996	5.2088	4.1411	4.9149	6.4094
TC0100016159.hg.1	DEDD	death effector domain containing	-0.568978	7.90875	0.0222062	7.4227	7.3868	7.3396	7.7764	8.1958	8.0965	7.9633	8.3407	8.0227	8.5429
TC0600013251.hg.1	HBS1L	HBS1 like translational GTPase	-0.669223	6.5732	0.0222225	6.3482	5.4719	6.1179	6.556	6.699	6.4307	7.1805	6.7056	7.063	7.1592
TC1000006924.hg.1	ARL5B	ADP ribosylation factor like GTPase 5B	-0.857683	6.63814	0.0222517	5.9231	5.9441	6.7369	6.1936	6.2487	7.0158	6.5845	6.5923	6.7544	8.3879
TC1000008733.hg.1	MFSD13A	major facilitator superfamily domain containing 13A	0.514752	5.8093	0.0222654	6.0398	6.0377	5.7041	6.0229	6.5288	5.4821	5.3077	5.6683	5.7877	5.5139
TC0100009903.hg.1	RPRD2	regulation of nuclear pre-mRNA domain containing 2	-0.722928	8.41037	0.022467	7.8637	7.2783	7.7436	8.4395	8.9195	8.8843	8.7757	8.9254	8.7409	8.5328
TC0800011764.hg.1	FAM84B	family with sequence similarity 84 member B	0.639643	5.63131	0.0224827	6.113	6.1342	5.6598	6.273	5.5757	6.0337	5.3512	5.2242	4.8438	5.1045
TC1700010923.hg.1	RPRML	reprimo like	0.477074	6.63888	0.0224921	7.0564	7.0918	6.804	6.8681	6.5668	6.2222	6.5664	6.1886	6.5141	6.5104
TC0400008813.hg.1	MGST2	microsomal glutathione S-transferase 2	0.797249	6.589	0.0225326	7.3684	7.4836	6.9067	6.6359	6.5435	6.367	6.8314	5.2372	6.5698	5.9465
TC1200008920.hg.1	OAS3	2'-5'-oligoadenylate synthetase 3	1.10774	7.84009	0.022611	8.1719	8.4611	8.919	6.9924	9.4254	8.3658	7.3254	6.8861	6.6243	7.2295
TC0900009768.hg.1	CAAP1	caspase activity and apoptosis inhibitor 1	-0.510028	7.15952	0.0226658	6.8265	6.8496	7.1731	6.9355	6.7378	7.527	6.9792	7.351	7.4096	7.8059
TC1900009822.hg.1	PTGER1	prostaglandin E receptor 1	0.519547	6.72761	0.0228015	7.014	7.0179	7.4182	6.5106	6.9763	6.4895	6.576	6.6391	6.2214	6.4132
TC0600012358.hg.1	PHIP	pleckstrin homology domain interacting protein	-0.635858	8.13765	0.0228367	8.0932	7.1791	7.7786	8.2835	7.7642	8.9046	8.0395	8.5482	8.1999	8.5857
TC1500010429.hg.1	CIB1	calcium and integrin binding 1	0.531982	6.32269	0.0228686	6.5957	6.9691	6.4328	6.7969	6.1489	6.3122	6.0233	5.8353	6.2346	5.8782
TC1000008765.hg.1	RPEL1	ribulose-5-phosphate-3-epimerase like 1	0.532071	5.88828	0.0228754	6.6804	6.1059	6.195	6.1006	5.6897	5.6996	5.6795	5.6735	5.6977	5.361
TC0500013259.hg.1	MFAP3	microfibrillar associated protein 3	-0.763844	7.00826	0.0229675	6.1609	6.17	6.9241	6.7303	7.1464	7.4873	7.0061	6.938	7.2055	8.3141
TC0800012386.hg.1	PINX1	PIN2/TERF1 interacting. telomerase inhibitor 1	-0.478498	5.94291	0.0230466	5.7664	5.601	5.6252	5.7347	5.791	6.4569	6.0189	6.4811	6.0816	5.8724
TC0100007971.hg.1	KCNQ4	potassium voltage-gated channel subfamily Q member 4	0.716611	5.87013	0.0231496	6.7456	6.6664	5.87	6.1074	5.7527	6.2501	5.3024	5.6683	5.0353	5.303
TC0600011379.hg.1	MDC1	mediator of DNA damage checkpoint 1	-0.723709	5.7167	0.0231804	4.9616	4.7802	5.6126	5.6244	5.7953	6.1672	5.5145	5.6807	6.3146	6.7157
TC0700012296.hg.1	BMT2	base methyltransferase of 25S rRNA 2 homolog	-0.510536	5.96758	0.0231939	5.6409	5.6083	5.8894	5.7188	5.7042	5.8651	5.8894	6.2998	6.4931	6.5668
TC1900008300.hg.1	RELB	RELB proto-oncogene. NF-kB subunit	0.482803	6.73536	0.0232384	6.9675	7.2132	7.0373	6.8444	6.8213	6.6159	6.2378	6.3214	6.4329	6.8618
TC1200007881.hg.1	INHBE	inhibin beta E subunit	0.453584	5.75655	0.0233586	6.0719	6.0909	6.1078	5.6915	5.9545	5.4591	5.5848	5.359	5.4746	5.7714
TC0X00009339.hg.1	TAB3	TGF-beta activated kinase 1/MAP3K7 binding protein 3	-0.666264	7.45607	0.0234449	6.8771	6.5054	6.9375	7.5185	7.7762	8.2059	7.4943	7.7326	7.5831	7.9301
TC1200012877.hg.1	ZNF605	zinc finger protein 605	-0.535434	5.15025	0.0234528	4.7912	4.8362	4.7155	5.3183	4.7514	5.7043	5.1365	5.1903	5.7879	5.2709
TC0X00008084.hg.1	COL4A5	collagen type IV alpha 5 chain	-0.772019	7.91514	0.0234842	7.5972	8.6248	6.8422	7.0722	7.5092	8.7018	8.1853	8.318	8.0379	8.2627
TC1900010847.hg.1	LYPD3	LY6/PLAUR domain containing 3	0.49227	5.1926	0.0234959	5.2056	5.8093	5.5794	5.2154	5.3838	5.0562	4.7904	5.2188	4.8167	4.8502
TC0X00011121.hg.1	GABRE	gamma-aminobutyric acid type A receptor epsilon subunit	-0.951969	4.89412	0.0235305	4.9818	4.3136	4.3554	4.3181	4.1218	5.8215	4.5934	6.7175	4.662	5.0562
TC1200009796.hg.1	SLC2A14	solute carrier family 2 member 14	-0.777791	7.06491	0.0235309	6.2381	6.6871	6.6716	6.6449	7.1384	7.7436	7.0763	6.5132	8.2237	7.7121
TC2000008895.hg.1	PXMP4	peroxisomal membrane protein 4	0.511699	7.59328	0.0236109	8.1137	8.2102	7.508	7.5792	7.8345	7.0597	7.3523	7.4745	7.3499	7.4508
TC0700008023.hg.1	GATSL2	GATS protein like 2	-0.517053	6.58711	0.0236116	5.959	6.3114	6.5683	6.529	6.2752	6.6729	6.5553	6.9429	6.8069	7.2502
TC0500008554.hg.1	MEGF10	multiple EGF like domains 10	0.551778	5.02075	0.0236405	5.4662	5.687	4.9835	5.1787	5.1677	4.6667	5.0997	4.9101	4.7904	4.2574
TC0900010792.hg.1	NOL8	nucleolar protein 8	-0.515646	5.46614	0.0236609	5.1412	4.819	5.2886	5.4638	5.3289	5.7508	5.7198	5.9142	5.2872	5.9477
TC1000007876.hg.1	DDX21	DEAD-box helicase 21	-0.709742	6.92942	0.0237542	6.7406	6.1467	6.4313	6.7009	6.8532	7.1104	6.9572	6.703	7.4345	8.2164
TC0300007733.hg.1	FAM19A1	family with sequence similarity 19 member A1. C-C motif chemokine like	1.23217	6.39103	0.0238361	7.4819	7.5173	6.0862	6.1825	7.7677	7.2012	5.0922	4.913	6.4847	5.1835
TC1800006615.hg.1	MTCL1	microtubule crosslinking factor 1	0.602971	6.11782	0.0238854	6.2713	6.488	6.1456	6.3107	6.8809	6.4444	5.3684	5.5682	5.7477	5.9529
TC0600013727.hg.1	EZR	ezrin	-1.32599	9.90013	0.02389	8.3829	9.5832	9.5643	9.6778	8.9774	8.4128	11.3651	11.5244	10.3124	11.2009
TC0700012755.hg.1	KIAA1549	KIAA1549	-0.550106	5.88639	0.0239311	5.6	5.5818	5.6183	5.6557	5.6009	6.2147	5.4935	6.657	6.2563	6.1856
TC0100009181.hg.1	PLPPR4	phospholipid phosphatase related 4	2.21594	5.58019	0.0239319	5.008	7.1284	7.7387	8.2572	5.3085	3.2178	3.1431	5.2976	7.5165	3.1861
TC1200011916.hg.1	PPP1CC	protein phosphatase 1 catalytic subunit gamma	-0.675215	9.95926	0.02401	9.7651	8.6292	10.0471	9.9615	9.7054	10.1121	10.5805	10.2799	10.1162	10.3956
TC0600011508.hg.1	TAP1	transporter 1. ATP binding cassette subfamily B member	0.969142	6.94416	0.024013	7.1395	7.493	7.7506	6.8304	7.9302	7.1943	5.6867	5.3494	6.9267	7.1409
TC0200015865.hg.1	SCG2	secretogranin II	1.95993	5.16246	0.024049	5.3852	6.2593	7.1083	6.9564	5.0029	2.5272	5.4066	3.6832	6.8606	2.4349
TC0800012156.hg.1	CCDC166	coiled-coil domain containing 166	0.649246	4.60922	0.0240572	5.2268	5.5962	4.6708	4.6921	4.4833	4.057	4.3394	4.815	4.2525	3.9591
TC1100009453.hg.1	ST3GAL4	ST3 beta-galactoside alpha-2.3-sialyltransferase 4	-0.638431	5.90001	0.0241078	5.4386	5.6972	5.2868	5.1693	6.312	6.4231	5.894	6.2927	5.8875	6.5988
TC0600014366.hg.1	PDE10A	phosphodiesterase 10A	-0.640025	8.22813	0.0242581	8.4171	7.5374	7.3813	8.0201	8.1847	8.345	8.3986	8.7594	9.0461	8.1916
TC1100006906.hg.1	FAR1	fatty acyl-CoA reductase 1	-0.504801	7.31355	0.0242631	6.9703	6.5762	7.4081	7.015	7.3361	7.5607	7.5018	7.4448	7.6492	7.6734
TC1100006820.hg.1	SWAP70	SWAP switching B-cell complex 70kDa subunit	-0.532216	6.15062	0.0243254	5.5707	6.1805	5.5955	6.0801	5.9958	6.3422	6.747	6.6406	6.2802	6.0736
TC1400008056.hg.1	IFI27	interferon alpha inducible protein 27	0.735833	7.09406	0.0243815	7.5107	7.5928	8.3994	6.9549	6.8521	6.7418	6.9695	6.5348	7.0665	6.3181
TC1300008760.hg.1	EPSTI1	epithelial stromal interaction 1 (breast)	0.979989	5.44805	0.0244204	5.7122	5.5818	5.9873	5.7758	6.633	5.9676	5.2138	4.113	3.9071	5.5887
TC0900006564.hg.1	RIC1	RIC1 homolog. RAB6A GEF complex partner 1	-0.573761	6.73208	0.0245129	6.1705	6.3915	6.5185	6.4954	6.6502	7.3214	6.3963	6.9409	6.9337	7.5026
TC0600013528.hg.1	LATS1	large tumor suppressor kinase 1	-0.654791	8.46323	0.0245704	7.6485	7.8857	8.3076	8.1014	8.7361	9.375	8.3449	8.5148	8.7254	8.993
TC1200012083.hg.1	FBXO21	F-box protein 21	-0.773492	6.83876	0.0246316	5.9074	6.2667	6.6603	6.3593	7.0663	6.4193	7.0881	8.0931	7.3534	7.1736
TC0400011600.hg.1	PITX2	paired like homeodomain 2	-1.10056	5.89938	0.0246556	5.4951	5.4406	5.1319	5.215	5.4629	7.9118	5.6175	5.4812	7.434	5.8039
TC0100012330.hg.1	OR2T8	olfactory receptor family 2 subfamily T member 8	0.522964	5.32371	0.0247019	6.0114	5.8092	5.1683	5.3984	5.5387	5.2434	4.9118	4.8624	5.0258	5.2677
TC0900011445.hg.1	PDCL	phosducin like	-0.436987	7.39239	0.0247312	6.9083	7.1211	7.333	7.1877	7.3194	7.6239	7.5499	7.4619	7.7553	7.6634
TC0600014142.hg.1	PTP4A1	protein tyrosine phosphatase type IVA. member 1	-0.659561	9.26243	0.0248193	8.7401	8.2108	9.2933	9.2149	9.2041	9.6111	9.0571	9.7194	9.4927	10.0807
TC1400009834.hg.1	GTF2A1	general transcription factor IIA subunit 1	-0.592411	6.65707	0.0248663	5.9383	6.1067	6.5247	6.3127	6.922	6.4536	7.0401	6.9038	7.2836	7.0853
TC0400010715.hg.1	CHIC2	cysteine rich hydrophobic domain 2	-0.590208	5.91129	0.0249173	5.9992	5.6734	5.4424	5.9362	5.0297	6.5222	6.3581	6.346	5.8361	5.9696
TC1700012193.hg.1	NDEL1	nudE neurodevelopment protein 1 like 1	-0.474249	5.89869	0.0250296	5.8407	5.6288	5.5939	5.655	5.5894	6.2574	5.8431	6.1324	5.9178	6.5284
TC0100009965.hg.1	SNX27	sorting nexin family member 27	-0.574422	7.87567	0.0250521	7.4281	7.336	7.0751	7.9947	8.1084	8.145	8.0256	8.4029	8.1695	8.0714
TC1700007626.hg.1	CCL4L2	C-C motif chemokine ligand 4 like 2	0.592526	4.68684	0.0251805	5.2815	5.1913	4.9747	4.7364	4.7316	5.0846	4.5125	4.0492	4.1311	4.1755
TC1800007448.hg.1	GRP	gastrin releasing peptide	0.551347	6.13624	0.0251913	6.8874	6.6789	6.3183	6.0379	6.1371	5.6462	5.9174	6.2466	5.7295	5.763
TC0100016147.hg.1	ITLN1	intelectin 1	0.535618	4.56378	0.0252691	5.1249	5.1255	4.8181	4.7439	4.3456	4.644	4.416	4.1711	3.9909	4.2578
TC1200007709.hg.1	PFDN5	prefoldin subunit 5	0.53191	9.90645	0.0252821	10.2087	10.2027	10.1896	9.9651	10.296	9.2276	9.9062	9.2291	10.0076	9.832
TC0400009767.hg.1	ZFYVE28	zinc finger FYVE-type containing 28	0.442146	6.62336	0.0253035	7.0181	6.9919	6.8216	6.8709	6.5196	6.2685	6.5138	6.4812	6.4235	6.3244
TC2200009194.hg.1	MED15	mediator complex subunit 15	-0.722063	7.87982	0.0253686	7.4714	6.7342	7.4672	8.03	7.8912	8.7866	8.1593	8.2308	8.4727	7.5549
TC0X00006593.hg.1	CLCN4	chloride voltage-gated channel 4	0.769218	5.80334	0.0253945	6.3774	6.4611	6.4728	6.1627	5.4658	5.6393	4.9759	5.0344	5.0455	6.3987
TC1700011523.hg.1	PSMD12	proteasome 26S subunit. non-ATPase 12	-0.55734	7.14786	0.0254048	6.6908	6.3526	7.1605	7.2529	6.8891	7.1393	7.2212	7.5651	7.449	7.758
TC1600010858.hg.1	RFWD3	ring finger and WD repeat domain 3	-0.933222	6.61411	0.0254502	5.8974	5.647	6.3791	5.7269	7.0871	7.1907	6.278	6.9309	6.7401	8.2639
TC0100007006.hg.1	SPEN	spen family transcriptional repressor	-0.545109	7.22271	0.0254533	6.9369	6.614	6.9694	7.4517	6.7788	7.9491	7.5948	7.2591	7.3689	7.3044
TC2000007514.hg.1	MMP9	matrix metallopeptidase 9	0.597553	5.91879	0.0255762	5.9326	6.2206	6.3809	6.6318	5.9219	5.9015	5.2027	5.3645	6.1784	5.453
TC0300011052.hg.1	LAMB2	laminin subunit beta 2	0.464243	8.75022	0.0256413	8.7719	8.862	9.0041	9.1931	9.0806	8.6703	8.6334	8.1469	8.6594	8.4805
TC0800009856.hg.1	EGR3	early growth response 3	-0.966505	6.83307	0.0257422	7.1086	6.1247	5.835	6.8914	5.7893	7.681	7.0344	6.2724	7.205	8.3888
TC0300010566.hg.1	EOMES	eomesodermin	0.580786	5.26061	0.0257462	5.5229	5.7429	5.6139	5.5019	5.3734	5.5545	5.1374	4.7133	5.1082	4.3377
TC1100012687.hg.1	MSANTD2	Myb/SANT DNA binding domain containing 2	-0.635976	5.14904	0.0257527	4.3433	4.976	4.9275	4.757	5.1515	6.2536	5.0892	5.1384	5.3209	5.5331
TC1600009256.hg.1	NAGPA	N-acetylglucosamine-1-phosphodiester alpha-N-acetylglucosaminidase	0.424878	7.06705	0.0258273	7.297	7.3246	7.2969	7.1376	7.3414	6.7782	6.9241	7.0758	6.859	6.6359
TC0100016006.hg.1	GPATCH4	G-patch domain containing 4	-0.575282	6.82746	0.0258827	6.5597	6.2136	6.2208	7.1762	6.5288	7.3526	6.72	7.2074	7.3273	6.9682
TC0300006483.hg.1	BHLHE40	basic helix-loop-helix family member e40	-0.970101	8.42666	0.025884	7.672	8.3471	8.0507	7.7758	7.8625	8.0724	8.8645	7.8518	9.9224	9.8475
TC0X00007221.hg.1	MAGIX	MAGI family member. X-linked	0.480496	5.70889	0.0258951	6.276	6.1768	5.8307	5.7905	5.6716	5.2523	5.4476	5.3784	5.57	5.6949
TC0900009202.hg.1	GPSM1	G-protein signaling modulator 1	0.505039	6.90334	0.0259449	6.9281	7.2673	6.911	7.1878	7.4851	7.029	6.4995	6.348	6.7931	6.5844
TC1700011131.hg.1	MBTD1	mbt domain containing 1	-0.464191	5.74165	0.0259474	5.619	5.5272	5.4032	5.3948	5.6036	6.3004	5.6808	6.1723	5.7883	5.9268
TC1900011741.hg.1	CEACAM5	carcinoembryonic antigen related cell adhesion molecule 5	0.596713	5.48301	0.0259916	5.9527	5.8863	5.7846	5.4273	5.8559	5.2342	5.1328	4.4619	5.359	5.7354
TC1600011359.hg.1	ITPRIPL2	inositol 1.4.5-trisphosphate receptor interacting protein like 2	-0.506621	5.73806	0.0259988	5.5097	5.1673	5.6637	5.284	5.799	6.2171	5.9233	5.9366	5.6325	6.2473
TC1900009155.hg.1	GAMT	guanidinoacetate N-methyltransferase	0.5445	6.95312	0.0260198	7.0598	7.4541	7.1083	7.5217	6.9829	6.741	6.7862	6.5763	7.1308	6.1701
TC1500010783.hg.1	SEMA4B	semaphorin 4B	0.707496	7.03123	0.0260502	6.8441	7.216	7.3532	8.2677	7.2438	7.0471	6.318	6.6045	7.1437	6.274
TC0200015773.hg.1	PTPRN	protein tyrosine phosphatase. receptor type N	0.477825	5.10782	0.0260728	5.6399	5.5832	5.3736	5.0741	5.0629	4.9455	4.6466	4.9794	4.7959	4.9772
TC1100007899.hg.1	RARRES3	retinoic acid receptor responder 3	1.07324	7.57836	0.0260894	7.3284	8.1523	8.8155	7.2024	9.0762	7.0759	6.7312	5.9631	7.55	7.8885
TC1900011743.hg.1	TMEM91	transmembrane protein 91	-0.676804	5.64272	0.0261206	4.9627	5.456	5.3853	4.8158	5.9018	5.6915	5.6752	6.6173	5.6193	6.3023
TC1200010616.hg.1	TUBA1B	tubulin alpha 1b	-0.534232	11.8204	0.026156	11.4271	11.2326	11.5037	11.7688	11.8339	11.9861	12.2577	11.6689	11.985	12.5396
TC1100006539.hg.1	TNNI2	troponin I2. fast skeletal type	0.452088	6.81337	0.0261577	7.1264	7.3553	6.8158	6.9577	6.942	6.6425	6.494	6.6713	6.3804	6.7486
TC1500007619.hg.1	SMAD6	SMAD family member 6	1.10225	6.15373	0.0261706	6.9343	6.5106	6.0824	6.2862	7.7108	5.8995	7.0528	4.6263	4.8122	5.6222
TC0400009978.hg.1	ACOX3	acyl-CoA oxidase 3. pristanoyl	-0.607332	6.68013	0.0261804	6.8664	5.8846	6.3534	6.7012	6.0768	7.4358	6.974	7.0989	6.8679	6.5424
TC1700008251.hg.1	EME1	essential meiotic structure-specific endonuclease 1	0.503895	6.96783	0.0261961	7.4239	7.6247	6.967	7.0783	7.005	7.0909	6.6349	6.6653	6.608	6.5804
TC0500011725.hg.1	MCC	mutated in colorectal cancers	-0.635266	7.4905	0.0262237	7.1483	7.2851	7.1772	7.1359	7.1179	7.7864	7.2384	7.4254	7.8959	8.6946
TC1700012251.hg.1	KRTAP4-7	keratin associated protein 4-7	0.450276	6.68237	0.026232	7.2196	7.0186	6.7961	6.7005	6.8028	6.2446	6.4881	6.6126	6.4097	6.5311
TC1900008245.hg.1	ZNF221	zinc finger protein 221	-0.602809	5.53782	0.0263161	4.9821	4.6351	5.4261	5.5199	5.619	6.1173	5.3498	5.7174	5.9647	6.0469
TC1000006880.hg.1	PTER	phosphotriesterase related	-0.681325	5.70245	0.0263616	5.1608	4.956	5.3093	5.9114	5.4714	5.5369	6.1826	5.4906	6.3112	6.6943
TC0400008228.hg.1	METAP1	methionyl aminopeptidase 1	-0.840254	4.76025	0.0264426	3.9825	4.0458	4.7428	4.7928	4.1367	4.5415	5.2038	5.8081	6.0167	4.3319
TC1600009870.hg.1	SULT1A1	sulfotransferase family 1A member 1	0.593443	5.07203	0.0264482	5.7684	5.9046	5.2332	4.9863	4.9513	4.5497	4.8481	4.536	5.1291	4.8136
TC0900009673.hg.1	MLLT3	MLLT3. super elongation complex subunit	1.16704	8.1664	0.0264765	8.5051	8.2665	9.2092	8.555	9.2139	8.0637	7.8431	8.2123	8.2815	5.5139
TC0900012221.hg.1	APTX	aprataxin	-0.608551	5.22178	0.026494	5.0171	5.0528	5.0596	4.9301	4.5279	6.0436	4.9442	5.0948	5.7225	5.8251
TC0300011144.hg.1	IQCF5	IQ motif containing F5	0.505658	6.91971	0.0264947	7.4102	7.5121	7.1688	7.0684	6.7032	6.6263	6.9787	6.631	6.5541	6.5443
TC1400009131.hg.1	MAP4K5	mitogen-activated protein kinase kinase kinase kinase 5	-1.05951	7.50866	0.026528	6.6616	5.485	7.8872	7.0813	7.7794	7.2583	7.9418	7.9286	8.718	8.3454
TC0100007760.hg.1	ZMYM1	zinc finger MYM-type containing 1	-0.5066	5.33802	0.0265982	5.4324	5.1243	5.0492	4.7746	5.0431	5.846	5.5664	5.7431	5.1222	5.679
TC1800006841.hg.1	MIB1	mindbomb E3 ubiquitin protein ligase 1	-0.84527	5.73556	0.0266131	4.211	5.0278	5.9876	5.3956	5.9426	5.9398	5.6774	6.0412	6.3224	6.8103
TC1500009200.hg.1	TTBK2	tau tubulin kinase 2	-0.66759	6.39022	0.0266689	6.2308	5.6928	6.6697	5.9921	5.6967	7.0928	6.6617	6.7467	7.1286	5.9902
TC0100013205.hg.1	ECE1	endothelin converting enzyme 1	-0.617892	8.95947	0.0267481	8.8874	8.9488	8.1438	8.6002	8.6724	9.0348	9.6202	9.8089	8.7206	9.1576
TC0800009886.hg.1	NKX2-6	NK2 homeobox 6	0.471817	6.11955	0.026763	6.5951	6.6197	6.1486	6.2647	6.1492	6.0967	6.0791	5.7441	5.6971	5.8012
TC0800006880.hg.1	PCM1	pericentriolar material 1	-0.432584	7.92349	0.0268046	7.7201	7.5241	7.8	7.6553	7.8364	8.3137	8.1626	8.056	7.8871	8.2795
TC0600006864.hg.1	RIOK1	RIO kinase 1	-0.582295	6.00402	0.0268538	6.3153	5.0065	5.5659	5.8127	5.8639	6.3618	6.3107	6.0974	6.3128	6.3932
TC1200009800.hg.1	SLC2A3	solute carrier family 2 member 3	-0.762652	6.59687	0.0269341	5.6673	6.1973	6.4646	6.2277	6.5208	7.0189	6.9764	6.0035	7.8839	7.0083
TC0500007237.hg.1	CARD6	caspase recruitment domain family member 6	-0.539711	4.99748	0.026999	5.0572	4.4812	4.6035	4.9937	4.5026	5.6321	4.8252	5.1087	5.5238	5.2468
TC2100007935.hg.1	SCAF4	SR-related CTD associated factor 4	-0.714242	7.92678	0.0270088	6.778	7.2096	7.9071	7.7956	8.158	8.7164	7.8577	8.6421	8.2257	7.9776
TC1500010866.hg.1	RAB27A	RAB27A. member RAS oncogene family	0.504315	5.9389	0.0270597	6.3572	5.825	6.4271	6.2999	6.0461	5.456	5.4569	5.7087	5.7026	6.1095
TC0900007994.hg.1	PHF2	PHD finger protein 2	-0.528312	7.41724	0.0271012	6.6979	7.0129	7.3029	7.0912	7.6605	7.9363	7.4287	7.8001	7.6683	7.5736
TC0100017113.hg.1	PIGR	polymeric immunoglobulin receptor	-0.511667	5.16331	0.0271112	5.002	4.8542	4.8026	5.1002	4.7783	5.9146	5.2438	5.6584	5.0721	5.2068
TC2000008056.hg.1	COL20A1	collagen type XX alpha 1 chain	0.547354	7.28892	0.0271821	7.6351	7.956	7.29	7.484	7.4479	7.4787	7.2591	6.9862	6.59	6.7622
TC0700007977.hg.1	FZD9	frizzled class receptor 9	0.586023	5.35359	0.0271871	5.8219	5.9341	5.7437	5.7131	5.0202	5.4334	5.1626	5.1906	4.5002	5.0162
TC0900012031.hg.1	MAN1B1-AS1	MAN1B1 antisense RNA 1 (head to head)	0.484279	5.50573	0.0273321	6.114	6.0318	5.5477	5.6022	5.4436	5.2239	5.1922	5.4286	5.3673	5.1059
TC1700007993.hg.1	RUNDC3A	RUN domain containing 3A	1.11698	5.605	0.0274976	5.5193	5.4021	5.9932	5.9083	7.9945	4.9811	4.1158	5.1632	5.599	5.3733
TC2100008490.hg.1	BACH1	BTB domain and CNC homolog 1	-0.771127	5.64928	0.027628	4.4936	4.4989	5.4905	6.0866	5.749	6.4107	5.9691	6.0026	5.933	5.8588
TC0300013835.hg.1	TEX264	testis expressed 264	0.555566	7.29375	0.0276432	7.4639	7.5113	7.8231	7.5893	7.47	6.3421	7.4182	7.1432	7.3127	6.8636
TC0200014404.hg.1	MCM6	minichromosome maintenance complex component 6	-0.78018	4.57521	0.0276762	4.002	3.3523	4.637	4.1944	4.7399	5.04	4.7768	4.9546	4.2799	5.7752
TC0100009064.hg.1	FNBP1L	formin binding protein 1 like	-0.829666	4.86106	0.0276812	4.4215	4.3502	4.6975	3.4686	5.2933	5.6494	5.9742	4.8598	5.1248	4.7713
TC0800009418.hg.1	ANGPT2	angiopoietin 2	-1.34509	5.99284	0.0277262	4.4625	5.1532	7.2876	4.6301	5.068	6.7235	6.0989	5.4825	7.9468	7.0753
TC1900010706.hg.1	SERTAD1	SERTA domain containing 1	-0.749489	6.55951	0.0277393	5.8195	5.7629	6.5885	6.2581	6.4948	6.3236	7.0002	7.482	6.2583	7.6071
TC1000008502.hg.1	TBC1D12	TBC1 domain family member 12	-0.722077	5.5476	0.0277841	4.9377	4.975	5.369	4.8584	5.7927	5.3802	5.8962	6.8433	5.4798	5.9437
TC2100007205.hg.1	MX2	MX dynamin like GTPase 2	1.04584	5.17028	0.0278376	5.5751	5.4803	6.1264	4.549	6.7352	5.8838	4.667	4.3436	4.5226	3.8198
TC0100012429.hg.1	NOC2L	NOC2 like nucleolar associated transcriptional repressor	0.63203	8.03804	0.0278904	8.6912	8.7737	7.9001	8.4559	7.9495	8.0994	8.1399	7.7377	7.3035	7.3296
TC0900010779.hg.1	SPTLC1	serine palmitoyltransferase long chain base subunit 1	-0.624279	6.92601	0.0279686	6.3113	7.2032	6.7941	6.4891	6.2717	7.1635	6.9102	6.897	7.3294	7.8906
TC0200011548.hg.1	TSSC1	tumor suppressing subtransferable candidate 1	0.462827	7.04811	0.0279991	6.9949	7.2417	7.3087	7.3559	7.4964	6.5557	6.8646	6.9362	7.1069	6.6202
TC0400012868.hg.1	STOX2	storkhead box 2	-0.646868	4.67034	0.0280024	4.462	4.0368	4.286	4.0714	4.8783	4.5296	5.0799	5.6616	5.1936	4.5042
TC0700011953.hg.1	CYP3A5	cytochrome P450 family 3 subfamily A member 5	-1.22844	4.34609	0.0280102	4.0528	3.4698	3.0893	3.9968	4.0505	5.273	3.6647	3.6352	5.7862	6.4424
TC1100011739.hg.1	ALG8	ALG8. alpha-1.3-glucosyltransferase	-0.931877	5.57592	0.0280199	4.7038	4.2524	5.3242	5.2466	6.0229	5.9301	5.1672	5.7502	6.2846	7.0772
TC2000008031.hg.1	COL9A3	collagen type IX alpha 3 chain	0.451388	5.38072	0.0280698	5.672	5.3812	5.4547	5.8374	5.6867	4.9143	5.1109	5.2465	5.0714	5.432
TC1400006823.hg.1	SCFD1	sec1 family domain containing 1	-0.733147	5.56691	0.0281271	4.9087	4.9333	5.3464	5.2097	5.6036	5.4398	6.6669	6.1751	6.3079	5.0778
TC1900011952.hg.1	ZNF780A	zinc finger protein 780A	-0.501118	4.82658	0.0281782	4.612	4.2581	4.5156	4.4602	5.0341	5.4715	4.883	5.0593	4.9515	5.0204
TC2200009350.hg.1	CSNK1E	casein kinase 1 epsilon	-0.462572	8.81062	0.0282404	8.8794	8.6816	8.4086	8.6877	8.2395	9.1611	9.1739	9.1154	8.8837	8.8754
TC0200007174.hg.1	SPAST	spastin	-0.756573	6.0944	0.0283871	5.3118	5.2663	5.864	5.5014	6.637	6.0983	6.7209	7.04	6.6681	5.8361
TC1600009666.hg.1	THUMPD1	THUMP domain containing 1	-0.641823	7.9627	0.0283942	7.3541	7.9748	7.7032	7.6485	7.5283	8.0138	8.0381	8.0069	8.103	9.2562
TC0100010514.hg.1	MPZL1	myelin protein zero like 1	-0.584658	7.33658	0.0284062	6.9518	6.5524	6.7859	7.3298	7.6014	7.4769	8.0937	7.3509	7.6356	7.5874
TC0300008561.hg.1	PARP14	poly(ADP-ribose) polymerase family member 14	0.654095	8.69793	0.0284353	9.1031	8.907	9.3068	8.2877	9.5203	8.8853	8.2995	7.8063	8.4234	8.44
TC0900008984.hg.1	NUP214	nucleoporin 214	-0.554239	8.41982	0.0285103	7.7134	7.9009	8.5164	8.1141	8.4686	8.9129	8.1846	8.7181	8.7663	8.9029
TC2200009335.hg.1	THOC5	THO complex 5	-0.665409	6.27872	0.0285263	5.7365	5.1467	6.1163	6.4396	6.291	6.3084	6.9188	6.7469	6.9143	6.1687
TC1400010619.hg.1	HIF1A	hypoxia inducible factor 1 alpha subunit	-0.909278	8.0702	0.0285734	7.2442	6.8297	7.8505	7.4908	8.6626	7.5529	9.0521	8.1597	8.8907	8.9688
TC0300011298.hg.1	DNASE1L3	deoxyribonuclease 1 like 3	0.801014	6.22313	0.028577	6.8943	6.4343	7.0588	6.0112	6.7195	6.1787	5.5874	5.1518	6.859	5.3361
TC0600014261.hg.1	DDX39B	DEAD-box helicase 39B	-0.615666	9.20475	0.028581	8.6757	8.5206	8.8872	8.7163	9.6847	9.9005	9.238	9.3999	9.784	9.2405
TC0900009520.hg.1	PTPRD	protein tyrosine phosphatase. receptor type D	-1.13289	7.76208	0.0285926	6.3547	6.8865	7.6161	7.0611	8.0598	8.8217	8.8395	7.8421	6.7621	9.3772
TC0500012568.hg.1	GEMIN5	gem nuclear organelle associated protein 5	-0.555563	6.41781	0.0285954	5.6563	5.7559	6.3697	6.3931	6.5252	6.5295	6.3972	6.8876	6.929	6.7346
TC1000010065.hg.1	ARHGAP21	Rho GTPase activating protein 21	-0.499175	5.41119	0.0286195	4.9879	5.259	4.9141	5.3124	5.3346	5.6648	6.105	5.692	5.2293	5.6128
TC1800007360.hg.1	RAB27B	RAB27B. member RAS oncogene family	0.595667	5.0645	0.028634	5.1592	4.8567	5.2463	5.5103	6.0391	5.0057	4.6732	4.7251	5.0607	4.3686
TC1000006796.hg.1	SEC61A2	Sec61 translocon alpha 2 subunit	-0.87286	4.19058	0.0286428	3.3971	3.6626	4.0948	3.2688	4.3474	5.4125	4.1387	3.7453	4.3599	5.4786
TC1400009134.hg.1	SAV1	salvador family WW domain containing protein 1	-0.634852	6.45349	0.0287216	6.0066	6.0427	6.1239	5.8838	6.6233	5.887	6.9201	6.9973	7.1855	6.8647
TC1600009397.hg.1	PRM3	protamine 3	0.486739	6.79892	0.0287571	7.1293	7.5367	7.0234	6.817	6.705	6.6868	6.6858	6.4436	6.4414	6.5202
TC1100011744.hg.1	GAB2	GRB2 associated binding protein 2	-0.676263	6.43374	0.0287791	5.724	5.5241	6.082	6.4613	6.6866	6.4134	6.2534	6.9468	6.9977	7.248
TC0700010245.hg.1	COL28A1	collagen type XXVIII alpha 1 chain	0.495911	6.69437	0.0287883	7.1352	7.2614	7.0013	6.9546	6.3592	6.6047	6.475	6.3212	6.4017	6.4295
TC0200014971.hg.1	SP3	Sp3 transcription factor	-0.468675	8.40915	0.0290306	8.1321	7.7586	8.1264	8.2738	8.5832	8.5928	8.7067	8.5075	8.6601	8.7503
TC0600014220.hg.1	SERPINB9	serpin family B member 9	-0.818754	7.41085	0.0290743	6.3498	6.5843	6.9287	7.6481	7.4965	6.9115	7.7287	8.0065	7.8164	8.6381
TC0500013232.hg.1	SMAD5	SMAD family member 5	-0.559153	9.56141	0.0291447	9.569	8.6343	9.2589	9.4655	9.4814	10.0021	9.8097	9.3637	10.0275	10.0018
TC0700013102.hg.1	KMT2C	lysine methyltransferase 2C	-0.651518	7.96082	0.0292695	7.4644	7.1733	7.9945	7.5664	7.9768	8.7417	7.5869	7.9699	8.7212	8.4132
TC2000008016.hg.1	MIR1-1HG	MIR1-1 host gene	0.49848	6.74861	0.0292756	7.1298	7.5086	7.0127	6.6596	6.6785	6.6842	6.4875	6.4122	6.388	6.525
TC0100015023.hg.1	DPYD	dihydropyrimidine dehydrogenase	-0.781727	7.71342	0.0292919	7.8305	7.8799	6.8271	7.351	6.7242	8.945	8.4344	7.7681	7.5313	7.8427
TC1700010735.hg.1	CCR10	C-C motif chemokine receptor 10	0.613152	5.82236	0.0293247	6.4969	6.5361	5.5075	6.2305	5.8738	5.13	5.7552	5.2209	5.5328	5.9399
TC1700006748.hg.1	TMEM102	transmembrane protein 102	0.442046	5.23895	0.0293787	5.5721	5.6263	5.5107	5.4793	5.1114	5.1982	5.178	4.9474	4.9158	4.8503
TC0400011643.hg.1	CAMK2D	calcium/calmodulin dependent protein kinase II delta	0.670744	7.85142	0.0294054	7.7618	8.0829	8.7783	8.7204	7.5907	7.307	7.8288	7.193	7.9299	7.3215
TC0200008089.hg.1	TLX2	T-cell leukemia homeobox 2	0.596478	5.94003	0.0294492	6.6186	6.703	5.9471	6.1838	5.7387	5.5605	5.3314	5.3562	5.8825	6.0784
TC0200016601.hg.1	GIGYF2	GRB10 interacting GYF protein 2	-0.463737	6.54079	0.0294521	6.3087	6.1048	6.1323	6.4789	6.5199	6.6693	6.7225	6.9305	7.0778	6.4632
TC0800011826.hg.1	ASAP1	ArfGAP with SH3 domain. ankyrin repeat and PH domain 1	-0.699379	5.90439	0.0294835	5.4009	4.8064	5.7833	5.7545	6.0284	6.0386	6.0174	5.6943	6.6543	6.8658
TC1200010130.hg.1	SOX5	SRY-box 5	-0.74321	4.89799	0.0295345	4.6884	4.5489	4.8249	3.957	4.6127	5.1583	4.8875	4.8368	5.0358	6.4296
TC0100018478.hg.1	NBPF10	neuroblastoma breakpoint family member 10	-0.594733	7.754	0.0295588	7.4761	7.7806	6.9734	7.6731	7.3801	8.7536	8.0257	8.051	7.7797	7.6467
TC0500012147.hg.1	HNRNPA0	heterogeneous nuclear ribonucleoprotein A0	-0.611237	8.77364	0.0297265	8.3568	7.7897	8.7133	8.5642	8.9161	8.5907	8.9535	9.3139	9.0335	9.5047
TC0X00008492.hg.1	SMIM10	small integral membrane protein 10	0.531888	6.18503	0.0297393	6.1245	6.2124	6.8288	6.4851	6.6041	5.7761	6.0103	5.4362	6.255	6.1179
TC0100013882.hg.1	FOXJ3	forkhead box J3	-0.763825	8.00346	0.0297472	7.6779	7.6852	7.0357	8.1019	7.607	9.2273	8.5045	8.7746	7.7508	7.6696
TC2200009337.hg.1	GATSL3	GATS protein like 3	0.610187	6.78594	0.0297557	7.3263	7.6993	6.7951	7.1323	6.5022	6.7305	6.2085	6.5808	6.7727	6.1117
TC1000012564.hg.1	DNAJC9	DnaJ heat shock protein family (Hsp40) member C9	-0.608179	4.83575	0.0298616	4.5894	4.1412	4.914	4.5599	4.4538	4.91	5.3596	4.6824	4.8783	5.8689
TC1400006953.hg.1	SSTR1	somatostatin receptor 1	1.93508	6.85068	0.029982	5.8553	7.204	8.5244	8.1833	9.3241	6.2823	5.5312	4.7679	8.6878	4.1464
TC0100018307.hg.1	ACKR1	atypical chemokine receptor 1 (Duffy blood group)	0.897403	5.70967	0.0300196	6.1225	6.1281	5.8545	5.8355	6.8514	5.5072	6.1949	5.0216	5.6498	3.9313
TC0500007725.hg.1	BDP1	B double prime 1. subunit of RNA polymerase III transcription initiation factor IIIB	-0.508991	5.74365	0.0300366	5.6922	4.9895	5.6764	5.6837	5.4041	6.1209	6.3062	5.9597	5.6246	5.9793
TC1600008640.hg.1	ADAD2	adenosine deaminase domain containing 2	0.391982	6.56541	0.0300656	6.9211	6.7144	6.7009	6.7436	6.7271	6.4001	6.3424	6.4678	6.3367	6.3002
TC1100013149.hg.1	SERGEF	secretion regulating guanine nucleotide exchange factor	-0.44967	4.82382	0.030098	4.7313	4.8091	4.4336	4.5057	4.5152	5.2058	4.8689	5.0519	4.7822	5.3345
TC0600006793.hg.1	CDYL	chromodomain Y-like	-0.631016	5.8087	0.0301048	5.2586	4.7947	5.7549	5.6241	6.0337	5.9206	5.949	5.8275	6.2735	6.6505
TC1200010518.hg.1	SLC38A2	solute carrier family 38 member 2	-0.796522	6.6378	0.0301759	6.6798	5.3272	6.1633	6.7382	6.2892	6.5023	7.2631	7.3932	6.3326	7.6891
TC1000009095.hg.1	SEC23IP	SEC23 interacting protein	-0.539654	7.41701	0.030178	6.8657	6.8788	7.2294	7.2035	7.5586	8.0405	7.5788	7.2757	7.4954	8.0438
TC0400008879.hg.1	GAB1	GRB2 associated binding protein 1	-0.679431	8.38666	0.0301796	7.7425	7.5385	8.5754	8.6057	7.7726	8.689	8.4241	9.2776	9.002	8.2392
TC1200009239.hg.1	KMT5A	lysine methyltransferase 5A	-0.52532	7.03083	0.0301831	6.5813	6.7789	6.8658	6.9247	6.6901	6.8001	7.1581	7.1485	7.5072	7.8536
TC0300012339.hg.1	GATA2	GATA binding protein 2	-0.496299	4.8802	0.0302235	4.4593	4.7844	4.9549	4.7261	4.2355	5.3621	5.3714	4.9886	5.1069	4.8128
TC0800009157.hg.1	LY6K	lymphocyte antigen 6 complex. locus K	0.621496	5.25812	0.0302411	6.1195	5.4046	5.5085	5.4768	5.335	4.9752	5.6523	4.8473	4.9587	4.3034
TC0100010192.hg.1	RRNAD1	ribosomal RNA adenine dimethylase domain containing 1	0.578045	7.62991	0.0302442	8.254	8.1644	7.6906	7.9661	7.5195	7.852	7.561	7.4116	6.8592	7.0206
TC1900009442.hg.1	TNFSF14	tumor necrosis factor superfamily member 14	0.523853	5.7168	0.0302609	5.916	6.2926	6.0144	6.0166	5.654	5.8885	5.4667	5.6907	5.2242	5.0043
TC0100011374.hg.1	IKBKE	inhibitor of kappa light polypeptide gene enhancer in B-cells. kinase epsilon	0.4526	6.5111	0.0302813	6.9684	6.7573	6.4595	6.6567	6.845	6.5152	6.2126	6.4618	5.9813	6.2533
TC1700011038.hg.1	ZNF652	zinc finger protein 652	-0.529612	8.18203	0.0303533	7.5901	7.5628	7.8484	8.1109	8.4739	8.6139	8.3305	8.6832	8.4093	8.1972
TC0900012230.hg.1	SLC25A51	solute carrier family 25 member 51	-0.488167	6.23231	0.030444	5.9478	6.0367	5.9604	6.1141	5.8821	6.2985	6.3005	6.2408	6.46	7.0822
TC0700008246.hg.1	DMTF1	cyclin D binding myb like transcription factor 1	-0.650346	8.45314	0.0304778	8.5449	8.0315	7.7871	8.2173	8.059	9.7307	8.5319	8.75	8.3475	8.5314
TC0100006840.hg.1	TARDBP	TAR DNA binding protein	-0.432349	7.7745	0.030557	7.4614	7.7356	7.6153	7.4927	7.4866	8.1427	7.6674	7.9061	8.0259	8.2113
TC0600011354.hg.1	TRIM10	tripartite motif containing 10	0.518488	5.50197	0.0305672	6.0217	5.9279	5.8191	5.6946	5.3427	5.4836	5.2094	4.7284	5.2594	5.5329
TC0500008632.hg.1	SLC22A5	solute carrier family 22 member 5	-0.717665	5.52714	0.0306104	4.7152	4.6647	5.4555	4.8641	6.1421	5.8088	5.3471	6.1034	6.2097	5.9609
TC1900011127.hg.1	HRC	histidine rich calcium binding protein	0.47811	5.6867	0.0307093	6.1666	6.2317	5.6529	5.8177	5.7598	5.7882	5.4476	5.2455	5.2421	5.5148
TC1900007950.hg.1	ZNF567	zinc finger protein 567	-0.657083	5.9452	0.0307497	5.1644	5.0741	5.7682	5.9015	6.175	6.0034	6.1707	6.2737	5.9523	6.9686
TC0900007063.hg.1	PHF24	PHD finger protein 24	0.586696	5.70176	0.0308614	6.741	6.1344	5.495	5.9326	5.6725	5.5057	5.5807	5.3687	5.5241	5.0629
TC0600014374.hg.1	PHF10	PHD finger protein 10	-0.637428	8.16007	0.0308742	7.9423	8.018	7.7311	8.2338	7.2816	7.7032	8.8837	8.8734	8.5243	8.4093
TC0300006622.hg.1	PPARG	peroxisome proliferator activated receptor gamma	-0.935221	4.56588	0.0308855	4.5822	4.0062	4.604	3.3516	3.9475	4.1475	5.739	6.1238	4.7526	4.4046
TC0200011130.hg.1	DGKD	diacylglycerol kinase delta	0.557447	7.53421	0.0309528	8.119	7.9509	7.5729	8.1129	7.309	7.5144	6.9192	6.9038	7.5577	7.3822
TC1100011128.hg.1	ATL3	atlastin GTPase 3	-0.633615	7.92741	0.0311032	7.1018	7.1935	7.863	7.7612	8.1335	8.0498	8.0467	7.8522	8.4135	8.8588
TC1600009865.hg.1	NUPR1	nuclear protein 1. transcriptional regulator	0.465532	9.34241	0.0311485	9.4107	9.6393	9.6956	9.5979	9.5323	9.3219	9.4121	9.215	8.9076	8.6915
TC0100011901.hg.1	RAB4A	RAB4A. member RAS oncogene family	-0.604609	6.45518	0.0313914	5.9618	6.1421	5.6398	6.5471	6.4735	6.4397	6.8244	6.2461	7.0285	7.2487
TC0600007825.hg.1	MAPK14	mitogen-activated protein kinase 14	-0.481475	6.60736	0.0314187	6.1817	6.1485	6.243	6.4104	6.8496	6.7349	6.651	6.7162	7.0849	7.0534
TC0100015352.hg.1	NRAS	neuroblastoma RAS viral oncogene homolog	-0.650705	6.31565	0.031419	5.502	6.3132	6.0524	6.341	5.7429	6.855	6.8144	6.0005	6.2615	7.2737
TC0400006517.hg.1	UVSSA	UV stimulated scaffold protein A	0.455586	6.11813	0.0314258	6.5065	6.4325	6.1007	6.5068	6.1831	5.9848	5.8864	5.7543	6.2221	5.6041
TC1200011914.hg.1	HVCN1	hydrogen voltage gated channel 1	-0.500735	6.83045	0.0315725	6.2374	6.5193	6.5689	6.7233	6.8515	6.9717	7.3439	7.4029	6.6262	7.0594
TC0X00008824.hg.1	TKTL1	transketolase like 1	0.510418	7.77331	0.0315744	8.2151	8.4354	7.9951	7.9337	7.5633	7.8537	7.5952	7.3793	7.5536	7.2087
TC1100009210.hg.1	ARCN1	archain 1	-0.462356	9.05699	0.0315781	8.7301	8.7054	8.6699	8.9898	9.0338	9.1519	9.2341	9.1212	9.1746	9.7591
TC1600007141.hg.1	LOC81691	exonuclease NEF-sp	-0.844045	6.24902	0.0316551	5.1326	5.9189	5.9508	5.7688	6.3639	5.8964	6.5346	6.2808	6.7052	7.9382
TC1100008669.hg.1	PRSS23	protease. serine 23	0.486722	6.90832	0.031662	7.2938	7.3595	7.2131	6.9793	6.9129	6.36	6.8975	7.0518	6.6348	6.3809
TC1400009524.hg.1	ZFP36L1	ZFP36 ring finger protein like 1	-0.555001	10.7662	0.0317434	9.8647	10.557	10.4565	10.5238	11.0415	11.4292	10.9096	11.1139	10.9308	10.835
TC2200007556.hg.1	MPPED1	metallophosphoesterase domain containing 1	0.535903	6.52257	0.0317543	6.4203	6.8095	7.1293	6.285	7.3084	6.316	6.3559	6.1864	6.2935	6.1213
TC1700012391.hg.1	MYO19	myosin XIX	-0.645803	4.68893	0.031862	4.4381	4.335	4.2975	3.9718	4.7876	5.5227	4.4172	5.1412	4.458	5.5201
TC0200010975.hg.1	AGFG1	ArfGAP with FG repeats 1	-0.469112	7.58592	0.0318656	7.0197	7.2934	7.4774	7.3116	7.6547	7.6348	8.118	8.0024	7.5734	7.7738
TC0X00011312.hg.1	ARMCX5	armadillo repeat containing. X-linked 5	-0.500658	6.41107	0.0318746	6.1623	6.3977	6.1135	5.8452	6.285	6.6194	6.1144	6.7726	6.8231	6.9775
TC0800011208.hg.1	RIDA	reactive intermediate imine deaminase A homolog	0.485721	6.10499	0.0319345	6.7842	6.2086	6.2644	6.3235	6.1586	5.8722	6.1879	5.6107	6.0497	5.5901
TC1900008058.hg.1	PLEKHG2	pleckstrin homology and RhoGEF domain containing G2	-0.658314	6.58721	0.0319665	6.1622	6.8652	6.6441	5.8482	5.7705	6.9604	6.7411	6.8704	6.434	7.5759
TC1900008240.hg.1	ZNF283	zinc finger protein 283	-0.487401	7.74441	0.0319745	7.3587	7.2367	7.4748	7.4458	7.9876	8.1569	7.8091	7.6757	8.129	8.1698
TC1500009460.hg.1	FAM214A	family with sequence similarity 214 member A	-0.501419	5.69837	0.0321441	5.6815	5.4892	5.5631	5.3312	5.1734	6.1038	6.1098	6.0998	6.0919	5.34
TC1100011339.hg.1	CABP2	calcium binding protein 2	0.449472	6.11525	0.0321625	6.3937	6.647	6.2586	6.342	6.0588	5.978	6.0094	6.0406	5.8788	5.5457
TC0800008266.hg.1	DPY19L4	dpy-19 like 4 (C. elegans)	-0.499433	8.25012	0.0321882	7.4552	8.304	8.3679	7.8698	8.0051	8.3744	8.4587	8.6228	8.3857	8.6576
TC0800007886.hg.1	PREX2	phosphatidylinositol-3.4.5-trisphosphate dependent Rac exchange factor 2	-0.626854	7.30144	0.0322444	7.0502	7.2152	7.1817	7.0005	6.4923	7.948	8.0413	7.9233	7.3262	6.8355
TC0900008793.hg.1	ZBTB34	zinc finger and BTB domain containing 34	-0.594724	4.82459	0.0322521	4.414	4.245	4.7637	4.4294	4.784	5.1841	4.8624	5.4731	4.4256	5.6646
TC1600010407.hg.1	NUDT21	nudix hydrolase 21	-0.633838	7.45025	0.0322664	6.894	7.2212	7.4043	6.8308	7.3163	6.9552	7.6559	7.8477	7.8962	8.4809
TC0700010561.hg.1	HOXA5	homeobox A5	0.701906	7.89327	0.0323029	7.9169	8.2725	8.0087	8.504	8.519	6.8801	7.6958	7.0659	8.5339	7.5358
TC1700009554.hg.1	ZNF594	zinc finger protein 594	-0.561572	4.93669	0.032448	4.1782	4.5003	4.9173	4.5251	5.1586	5.4989	4.7241	5.4114	5.0909	5.3621
TC1100007167.hg.1	FSHB	follicle stimulating hormone beta subunit	0.428375	5.65613	0.0324602	5.849	5.9799	5.9835	5.9596	5.5796	5.3506	5.3354	5.4338	5.7546	5.3352
TC0X00007325.hg.1	RIBC1	RIB43A domain with coiled-coils 1	0.551651	5.42299	0.0324926	5.9429	6.0285	5.6613	5.6731	5.1884	5.4975	5.0358	5.4995	4.6759	5.0272
TC1200010413.hg.1	ABCD2	ATP binding cassette subfamily D member 2	0.618023	4.82405	0.0325053	5.6115	5.1091	4.845	5.2654	4.8342	4.842	4.9596	4.6675	4.3611	3.745
TC0100016171.hg.1	MPZ	myelin protein zero	0.569581	5.40344	0.0327008	6.0031	6.0403	5.6766	5.6977	5.0234	5.6039	5.0854	5.053	5.1044	4.7465
TC0300010372.hg.1	GRIP2	glutamate receptor interacting protein 2	0.521001	5.24778	0.0327543	5.3757	5.5368	5.9595	5.1805	5.4888	5.488	5.0807	4.6674	4.9451	4.7552
TC1000012395.hg.1	CALY	calcyon neuron specific vesicular protein	0.438326	8.09832	0.0328833	8.4062	8.4671	8.1743	8.4236	8.1163	8.0902	8.0642	7.8933	7.54	7.8081
TC0600011441.hg.1	BAG6	BCL2 associated athanogene 6	-0.604745	9.48325	0.0329175	8.8218	8.5642	9.2992	9.3986	9.8205	9.8294	9.3551	9.8041	9.8134	10.1261
TC0X00009755.hg.1	IQSEC2	IQ motif and Sec7 domain 2	0.533229	6.14698	0.0329191	6.4426	6.7262	6.566	6.002	6.3311	5.9995	6.2093	6.1558	5.6998	5.3374
TC2200009351.hg.1	CSNK1E	casein kinase 1 epsilon	-0.429345	8.30405	0.0329692	8.3279	8.2278	8.05	7.9412	7.9	8.6179	8.6636	8.6125	8.4649	8.2346
TC1000011005.hg.1	P4HA1	prolyl 4-hydroxylase subunit alpha 1	-0.454251	7.17899	0.0329951	6.6573	6.7354	7.2085	7.1653	6.9928	7.2516	7.579	7.1656	7.5349	7.4994
TC0800007330.hg.1	DDHD2	DDHD domain containing 2	-0.616987	6.766	0.0330215	6.3948	6.1067	6.1311	6.7534	6.9015	6.4836	7.2528	7.0735	7.7212	6.8414
TC1800006656.hg.1	VAPA	VAMP associated protein A	-0.527933	8.45035	0.0330285	7.9929	8.0568	8.1894	8.7285	7.9644	8.1944	9.0523	8.7976	8.7492	8.7782
TC0500006640.hg.1	UBE2QL1	ubiquitin conjugating enzyme E2 Q family like 1	0.416188	6.35234	0.0330881	6.6305	6.7585	6.6171	6.5921	6.2038	6.0848	6.139	6.0616	6.2335	6.2022
TC0700012658.hg.1	CHCHD3	coiled-coil-helix-coiled-coil-helix domain containing 3	-0.527824	7.59575	0.0331235	7.0516	7.2709	7.1869	7.6465	7.5033	7.6932	7.8978	7.3564	7.9728	8.3781
TC1400008583.hg.1	CCNB1IP1	cyclin B1 interacting protein 1	-1.02251	4.63868	0.0331503	3.316	3.2026	4.7893	3.8633	5.4658	4.2072	5.269	5.0809	5.4748	5.7177
TC1500007004.hg.1	RTF1	RTF1 homolog. Paf1/RNA polymerase II complex component	-0.565346	7.56001	0.0331923	6.9472	6.8026	7.5649	7.389	7.6829	7.593	7.4496	8.1529	8.1927	7.8252
TC1700008216.hg.1	KAT7	lysine acetyltransferase 7	-0.749899	6.59215	0.0332604	5.9768	5.1524	6.4042	6.5173	7.0353	7.0083	6.5823	7.437	6.7511	7.0568
TC0500011255.hg.1	MTX3	metaxin 3	-0.439131	5.26836	0.0332851	5.0685	4.8875	4.7165	5.3797	5.1918	5.6335	5.4631	5.4069	5.5562	5.3799
TC0100017503.hg.1	LEFTY2	left-right determination factor 2	0.699339	8.28901	0.0333146	8.2238	8.6742	7.9521	9.2581	9.0852	7.7505	7.6615	7.4727	8.3692	8.4429
TC0300012281.hg.1	ZXDC	ZXD family zinc finger C	-0.538482	7.73735	0.0333424	7.0231	7.0179	7.6209	7.9446	7.734	7.8698	7.7616	8.1997	8.1691	8.0328
TC0900007437.hg.1	FOXD4L4	forkhead box D4-like 4	0.421473	5.53803	0.0333577	5.8431	5.9838	5.7946	5.6897	5.4326	5.1621	5.4871	5.3762	5.3155	5.2957
TC1900011742.hg.1	CEACAM6	carcinoembryonic antigen related cell adhesion molecule 6	0.468902	6.04425	0.0335876	6.7117	6.2546	6.1465	6.0522	6.2285	5.9798	5.698	5.6894	6.1175	5.5642
TC0100008591.hg.1	PGM1	phosphoglucomutase 1	-0.552007	7.02822	0.0336268	6.9141	7.0858	6.1843	7.2774	6.2994	7.3044	7.4081	7.2618	7.2808	7.266
TC0X00008198.hg.1	PLS3	plastin 3	-0.660723	5.5557	0.0337374	4.779	5.2316	5.4722	5.2583	5.3857	5.3759	6.8071	6.1175	5.3961	5.7337
TC0200011304.hg.1	TWIST2	twist family bHLH transcription factor 2	0.748337	5.64681	0.0337505	5.7931	6.0139	5.7141	5.8585	6.7253	5.2888	5.7065	4.9708	6.0529	4.3442
TC0X00006701.hg.1	TXLNG	taxilin gamma	-0.574215	4.76826	0.0338145	5.0245	4.2356	4.0203	4.3966	4.7287	5.3744	4.6598	5.387	4.7463	5.1093
TC0500007912.hg.1	ZFYVE16	zinc finger FYVE-type containing 16	-0.473195	7.13532	0.0339967	6.6527	6.8717	7.0176	7.1224	6.8292	7.627	7.1608	7.0576	7.2569	7.7573
TC0100007943.hg.1	RLF	rearranged L-myc fusion	-0.549391	6.42497	0.03414	6.1232	6.4273	5.9735	6.157	6.0703	7.2106	6.2373	7.1692	6.3844	6.4969
TC0800012351.hg.1	WDYHV1	WDYHV motif containing 1	0.500481	5.53124	0.0342042	5.8471	6.2161	5.8159	5.6768	5.3515	5.0695	5.33	5.1798	5.7082	5.1175
TC1700007571.hg.1	ZNF830	zinc finger protein 830	-0.611074	6.08063	0.034247	5.4363	5.2797	5.7743	6.0159	6.3693	5.9937	6.3662	6.8393	6.024	6.7077
TC1900006620.hg.1	GNA15	G protein subunit alpha 15	0.47854	7.60301	0.0342809	7.9079	8.1689	7.9304	7.671	7.5332	7.6262	7.3988	7.2968	7.5565	6.9405
TC0400011087.hg.1	CCNI	cyclin I	-0.513401	11.2521	0.0343639	10.8842	10.7226	11.2895	11.2284	10.8524	11.0718	11.5579	11.2822	11.9801	11.6521
TC1400007265.hg.1	TMEM260	transmembrane protein 260	-0.949784	5.2806	0.0344467	4.2202	3.7176	5.4377	4.6594	5.9936	5.1219	5.7042	5.7885	6.5547	5.6082
TC2000008546.hg.1	C20orf78	chromosome 20 open reading frame 78	0.553176	5.04981	0.034459	5.1679	5.9793	5.4006	4.9059	5.1783	5.1598	4.5675	4.7877	4.4351	4.916
TC1100006495.hg.1	TSPAN4	tetraspanin 4	-0.656372	6.88668	0.0344711	7.0923	6.4426	6.5307	6.1325	6.5943	7.2431	8.0456	7.3534	6.8002	6.6321
TC0400006579.hg.1	ADD1	adducin 1	-0.525139	9.3196	0.0344765	8.8087	8.6528	9.3582	9.4356	9.0298	9.4002	9.547	9.754	9.9812	9.2284
TC0600009127.hg.1	AMD1	adenosylmethionine decarboxylase 1	-0.647978	7.47825	0.0345281	6.6356	6.6834	7.6389	7.2876	7.5258	7.3223	7.9758	7.5331	8.4521	7.7278
TC0700010182.hg.1	PMS2	PMS1 homolog 2. mismatch repair system component	-0.587175	6.83483	0.0345628	6.0152	6.1648	6.5189	6.7555	7.2517	6.834	6.8944	7.2862	7.3598	7.2678
TC1100009245.hg.1	CBL	Cbl proto-oncogene	-0.647034	6.37232	0.0345744	5.8233	5.1857	6.3363	6.1299	6.7688	6.5907	6.3857	6.7675	7.0435	6.6917
TC1700009861.hg.1	TVP23C	trans-golgi network vesicle protein 23 homolog C (S. cerevisiae)	-0.612058	8.01398	0.0346387	7.9523	7.0344	7.7306	8.154	7.6685	8.3979	7.9784	7.8596	8.4918	8.8724
TC0100012320.hg.1	OR2G3	olfactory receptor family 2 subfamily G member 3	0.44787	6.20521	0.0346999	6.3427	6.8849	6.4763	6.1755	6.2663	5.8335	6.013	5.9989	5.8874	6.1736
TC0100006683.hg.1	HES3	hes family bHLH transcription factor 3	0.430784	5.96352	0.0347176	6.0043	6.4061	6.3575	6.1947	5.9319	5.6946	5.7977	5.4791	5.8731	5.8961
TC0100018339.hg.1	MDM4	MDM4. p53 regulator	-0.45672	6.9522	0.0347575	6.4648	6.7401	6.6615	6.5597	7.1931	7.2815	7.0576	7.0399	7.1075	7.4164
TC0800009872.hg.1	TNFRSF10D	TNF receptor superfamily member 10d	-0.677311	5.25264	0.0347614	4.7498	5.5163	5.0225	4.7764	4.5049	5.9406	5.1503	5.2757	5.1671	6.4227
TC0200011726.hg.1	NOL10	nucleolar protein 10	-0.536488	5.47468	0.0347768	4.6307	4.8555	5.438	5.4687	5.6393	5.9483	5.7255	5.781	5.7887	5.4711
TC1800009306.hg.1	RNF152	ring finger protein 152	-0.857097	5.98805	0.0347814	6.325	5.9194	4.8743	5.909	4.7698	6.5545	6.2357	5.4756	7.1572	6.6601
TC1600011553.hg.1	PSMB10	proteasome subunit beta 10	0.451512	7.02447	0.0348593	7.4592	7.1336	7.4612	6.8615	7.3356	6.7499	6.7716	6.6225	6.7344	7.1152
TC0100009441.hg.1	CTTNBP2NL	CTTNBP2 N-terminal like	-0.607242	6.78591	0.0350267	6.1165	6.8881	6.1937	6.7528	6.4604	7.6253	7.2894	7.3565	6.6342	6.5422
TC0400012905.hg.1	QDPR	quinoid dihydropteridine reductase	0.508659	5.66033	0.0350484	5.9903	6.1374	5.9643	5.8646	5.6167	5.0806	5.6063	5.6542	5.7668	4.9221
TC1000012511.hg.1	PRAP1	proline rich acidic protein 1	0.478423	5.42649	0.0351075	5.8444	5.9492	5.6474	5.6942	5.1933	5.3006	5.0665	5.2797	4.8515	5.438
TC0900007865.hg.1	SECISBP2	SECIS binding protein 2	-0.600868	5.50071	0.0351465	5.4249	4.7886	5.0619	5.3211	5.4049	6.1972	5.5475	6.1822	5.0294	6.0493
TC0600010757.hg.1	SLC35B3	solute carrier family 35 member B3	-0.561441	5.39524	0.0351475	5.1681	5.3903	4.5577	5.1129	5.3437	5.9497	5.6428	5.2489	5.3601	6.1783
TC2000008856.hg.1	C20orf203	chromosome 20 open reading frame 203	0.453233	5.08452	0.0351477	5.4684	5.5682	5.4759	5.1311	4.9121	4.9637	4.7353	4.6905	4.8248	5.0752
TC1200010397.hg.1	CPNE8	copine 8	-0.675588	7.54491	0.0351973	6.7499	6.7606	7.558	6.8145	8.1526	8.0726	7.771	7.664	7.6443	8.2616
TC1600006459.hg.1	RPL23AP5	ribosomal protein L23a pseudogene 5	0.425942	6.09859	0.0352049	6.4047	6.5079	6.4626	6.2387	5.9438	5.8996	6.0773	5.9013	5.7962	5.7538
TC0X00009124.hg.1	PIGA	phosphatidylinositol glycan anchor biosynthesis class A	-0.638286	6.09574	0.035226	5.3888	5.541	6.0736	5.9814	5.8982	6.3296	5.823	6.3217	6.2625	7.3376
TC0400011299.hg.1	FAM13A	family with sequence similarity 13 member A	-0.499198	6.40536	0.0352461	6.2281	6.3666	6.1286	6.4368	5.6188	6.2846	6.649	6.9556	6.5902	6.7954
TC0100011192.hg.1	IPO9	importin 9	-0.541515	8.90935	0.0353041	8.5015	8.0255	8.7232	8.8323	9.1104	9.2751	8.876	8.9706	9.2622	9.5167
TC2100007597.hg.1	HSPA13	heat shock protein family A (Hsp70) member 13	-0.69543	7.21972	0.0353299	6.175	6.5238	7.44	6.8511	7.3702	7.0663	7.3384	7.3072	8.067	8.0583
TC1400009690.hg.1	ABCD4	ATP binding cassette subfamily D member 4	-0.501969	5.58263	0.0353664	5.2014	5.3187	5.1842	5.0429	5.911	5.61	6.1387	5.9799	5.8599	5.5795
TC1000006624.hg.1	CALML3	calmodulin like 3	0.563814	6.46473	0.0353857	6.8902	7.0754	6.6141	6.7215	6.432	6.6424	6.6153	6.1329	5.572	5.9515
TC0200016047.hg.1	NPPC	natriuretic peptide C	-0.833846	6.87786	0.0354524	6.6125	5.7049	6.3595	6.4141	7.2138	6.3049	8.1131	6.8343	7.7655	7.4561
TC1700009402.hg.1	SMYD4	SET and MYND domain containing 4	-0.656989	4.93407	0.0354877	4.1088	4.5442	4.7563	4.6629	4.9557	5.1052	4.859	6.2851	4.9953	5.0681
TC0100010159.hg.1	SLC25A44	solute carrier family 25 member 44	-0.542225	6.98799	0.0355214	6.4883	6.7134	6.1316	6.9892	7.2618	7.2153	6.9434	7.3547	7.2786	7.5035
TC0300011135.hg.1	DCAF1	DDB1 and CUL4 associated factor 1	-0.511029	5.23692	0.0355379	4.892	4.8111	5.0879	5.0177	5.0983	4.959	5.1701	5.7354	5.647	5.9507
TC1000008088.hg.1	SAMD8	sterile alpha motif domain containing 8	-0.45104	6.22142	0.0355827	6.1391	6.0304	5.7645	5.9304	6.1152	6.2654	6.1097	6.5415	6.4747	6.8434
TC2200007407.hg.1	CACNA1I	calcium voltage-gated channel subunit alpha1 I	0.564255	5.73281	0.0357218	6.4516	6.0613	5.5747	5.926	6.0611	6.0873	4.9541	5.4609	5.2652	5.486
TC1000012581.hg.1	ARHGAP19-SLIT1	ARHGAP19-SLIT1 readthrough (NMD candidate)	-0.596146	6.22928	0.0357885	5.8617	5.5207	6.0321	5.7907	6.4508	6.6742	5.827	6.8046	6.3468	6.9842
TC1100008505.hg.1	EMSY	EMSY. BRCA2 interacting transcriptional repressor	-0.613552	8.05714	0.035809	7.5466	7.5405	7.6086	7.7503	8.3058	8.9329	7.7343	8.2637	8.0767	8.8119
TC0800009971.hg.1	SCARA5	scavenger receptor class A member 5	0.728426	5.8698	0.0358489	6.6441	5.8378	5.8085	6.1723	6.7073	6.0913	4.9682	5.0182	6.2888	5.1613
TC1500010893.hg.1	PTPN9	protein tyrosine phosphatase. non-receptor type 9	-0.753308	7.82422	0.0359631	6.7988	6.7489	8.0254	7.4577	8.2071	7.5254	8.079	8.5606	8.277	8.5624
TC0900008763.hg.1	PBX3	PBX homeobox 3	-0.695162	7.25962	0.035996	7.0564	6.2936	6.3998	7.4292	7.3811	7.1644	7.5782	7.6613	7.2583	8.3737
TC1400009793.hg.1	SNW1	SNW domain containing 1	-0.596593	6.47792	0.0360323	5.9112	5.6342	6.3377	6.1551	6.8599	6.2828	7.0424	7.1077	6.837	6.6112
TC1400007172.hg.1	STYX	serine/threonine/tyrosine interacting protein	-0.676314	7.39711	0.0360348	6.6576	6.5082	7.2899	7.0846	7.7544	6.9094	7.8562	7.795	8.0378	8.0779
TC0400008093.hg.1	PKD2	polycystin 2. transient receptor potential cation channel	-0.652763	6.79532	0.0360469	6.6764	5.976	6.9759	6.5612	6.1551	6.9629	7.5898	7.226	7.5217	6.3082
TC2100007850.hg.1	LTN1	listerin E3 ubiquitin protein ligase 1	-0.528313	6.57235	0.0360659	5.5336	6.5016	6.4288	6.6127	6.4642	7.0701	6.7823	6.7476	6.8971	6.6854
TC1300009781.hg.1	COL4A1	collagen type IV alpha 1 chain	-0.628131	6.01183	0.0360952	5.5276	5.1078	5.8442	5.988	6.0213	5.6064	6.824	6.0819	6.4544	6.6627
TC1700008709.hg.1	BPTF	bromodomain PHD finger transcription factor	-0.628488	9.25415	0.0361084	8.5531	8.2785	9.1617	9.1529	9.5533	9.8549	9.0916	9.7921	9.8044	9.299
TC0X00011334.hg.1	BRCC3	BRCA1/BRCA2-containing complex subunit 3	-0.487151	6.31471	0.0361409	5.576	5.8507	6.1943	6.3481	6.3866	6.4141	6.697	6.6205	6.7363	6.3235
TC1700007057.hg.1	NT5M	5'.3'-nucleotidase. mitochondrial	0.425519	5.80161	0.0361478	5.9659	6.2242	5.7792	6.1168	5.9858	5.5217	5.3816	5.4245	5.7987	5.8178
TC1800007523.hg.1	PHLPP1	PH domain and leucine rich repeat protein phosphatase 1	-0.621454	6.66472	0.0362756	6.9635	6.5414	5.9312	5.6205	6.7133	6.6696	7.1271	6.7494	7.1105	7.2207
TC1700012215.hg.1	KSR1	kinase suppressor of ras 1	-0.927576	8.23669	0.0362962	7.4627	7.6161	7.7389	7.7674	8.2794	9.6082	7.6306	8.4634	7.946	9.8542
TC1400006566.hg.1	TOX4	TOX high mobility group box family member 4	-0.947878	8.01616	0.0363273	6.9067	6.5851	7.4916	7.6997	9.028	7.905	8.5013	9.0346	8.9151	8.0946
TC1200008081.hg.1	DYRK2	dual specificity tyrosine phosphorylation regulated kinase 2	-0.425993	5.60008	0.0364896	5.4362	5.2337	5.5938	5.4288	5.2429	5.9127	5.5319	5.7078	5.7854	6.1276
TC1800009284.hg.1	C18orf32	chromosome 18 open reading frame 32	0.474391	7.16096	0.0364967	7.2074	7.542	7.6585	7.5362	7.0466	6.6668	7.2144	7.1493	6.9474	6.6409
TC1800008707.hg.1	MEX3C	mex-3 RNA binding family member C	-0.56717	6.98837	0.0365402	6.3679	6.706	6.6379	6.8554	6.9566	6.7539	7.0109	7.1294	7.4705	7.9952
TC0900008483.hg.1	SLC31A1	solute carrier family 31 member 1	-0.688758	8.9716	0.0365806	8.469	8.3173	8.5467	8.6014	9.2016	8.8089	9.3543	9.339	8.7597	10.318
TC1600010618.hg.1	EXOC3L1	exocyst complex component 3 like 1	0.40387	6.4377	0.0366081	6.4024	6.8526	6.5802	6.6241	6.7389	6.4137	6.0786	6.3131	6.1627	6.2107
TC1000007061.hg.1	GPR158	G protein-coupled receptor 158	1.68744	6.12381	0.0366093	8.5223	7.9082	5.3476	7.5659	5.4936	6.8613	4.155	4.2997	6.7256	4.3588
TC0900007435.hg.1	CBWD5	COBW domain containing 5	-0.391906	8.2374	0.0366123	8.0209	7.9499	7.8668	8.1855	8.1842	8.2924	8.4377	8.3916	8.4549	8.5902
TC0400012796.hg.1	PDGFRA	platelet derived growth factor receptor alpha	-0.47341	11.9148	0.0366491	11.7905	11.7395	11.9466	11.6844	11.2294	12.4168	12.2645	11.8333	12.309	11.9338
TC2200008710.hg.1	JOSD1	Josephin domain containing 1	-0.486362	6.23385	0.036748	5.8144	6.2373	6.0094	6.1911	5.7012	6.1834	6.1206	6.8013	6.7711	6.5087
TC0500009610.hg.1	NSD1	nuclear receptor binding SET domain protein 1	-0.488471	6.93441	0.0368259	6.7277	6.3022	6.606	6.8214	6.9937	7.3474	7.2238	6.6546	7.4176	7.2498
TC0100011026.hg.1	TROVE2	TROVE domain family member 2	-0.535046	7.3418	0.0368514	7.1229	6.2952	7.2263	7.4314	7.2956	7.3718	7.6082	7.8255	7.5582	7.6829
TC1000010849.hg.1	SLC25A16	solute carrier family 25 member 16	-0.514583	5.69156	0.0368919	5.4008	4.9117	5.3198	6.0038	5.5351	5.7064	6.2182	5.8	5.938	6.0817
TC0500012642.hg.1	RNF145	ring finger protein 145	-0.500765	5.88707	0.0370983	5.813	5.336	5.4719	5.6218	5.9408	6.2017	5.9923	5.6952	6.1599	6.6381
TC0200012734.hg.1	USP34	ubiquitin specific peptidase 34	-0.644514	7.62831	0.0372578	7.0863	6.5966	7.7445	7.3889	7.714	8.3194	7.6023	8.1269	8.3404	7.3638
TC0100009352.hg.1	SYPL2	synaptophysin like 2	0.829865	5.78814	0.0373584	6.1208	6.2921	6.0177	6.644	5.9409	4.9551	5.3786	6.4208	5.9381	4.1736
TC1700010036.hg.1	ALDH3A1	aldehyde dehydrogenase 3 family member A1	0.385083	6.38324	0.0373664	6.5278	6.4967	6.7997	6.5227	6.5319	6.3023	6.1298	6.2681	6.198	6.0553
TC0100017058.hg.1	TMEM81	transmembrane protein 81	0.53119	5.7603	0.0373731	6.1755	6.4136	5.9639	6.2721	5.3044	5.4165	5.4583	5.3001	5.8164	5.4822
TC0900010794.hg.1	OGN	osteoglycin	2.70899	5.34891	0.037385	8.1362	8.6905	3.2204	10.1301	3.3399	2.9837	4.5012	4.8075	3.7006	3.979
TC1900011571.hg.1	ZNF550	zinc finger protein 550	0.508193	6.24603	0.037514	6.6222	6.9539	6.4806	6.3952	6.0488	6.3171	6.2324	5.7726	5.9899	5.6477
TC1200007844.hg.1	RBMS2	RNA binding motif single stranded interacting protein 2	-0.46968	8.44607	0.0375198	7.8843	8.0355	8.4551	8.1218	8.5595	8.8398	8.4346	8.5104	8.6293	8.9904
TC0100014855.hg.1	GBP4	guanylate binding protein 4	0.831365	7.9895	0.0376182	8.2588	8.5026	8.9261	7.7582	8.5802	8.3478	8.287	6.3619	7.384	7.4884
TC0100007940.hg.1	CAP1	adenylate cyclase associated protein 1	-0.411657	10.013	0.0376583	9.8703	9.9022	9.4452	9.9673	9.8508	10.217	10.2745	10.3634	10.0213	10.2178
TC1400010317.hg.1	CKB	creatine kinase B	0.839936	8.39369	0.0377598	8.2768	8.5379	8.719	9.3227	9.212	7.0203	8.1617	8.2009	9.1183	7.3673
TC1900012058.hg.1	ZNF417	zinc finger protein 417	-0.466134	6.77753	0.0378513	6.6024	6.8342	6.494	6.4247	6.367	7.2787	6.6101	6.8167	6.9913	7.3562
TC0100015761.hg.1	CERS2	ceramide synthase 2	-0.744749	7.76439	0.0378857	6.6248	7.0338	7.313	7.7921	8.1964	7.583	7.908	8.1353	8.1019	8.9557
TC0X00011083.hg.1	TMEM185A	transmembrane protein 185A	-0.607473	6.17799	0.0379093	5.1917	5.5107	5.8531	6.3389	6.4769	6.151	6.4949	6.872	6.4401	6.4505
TC0100013192.hg.1	SH2D5	SH2 domain containing 5	0.403999	5.92149	0.0380879	6.0889	6.1393	6.2102	6.2913	5.8879	5.6459	5.8865	5.522	5.6454	5.8977
TC1800009229.hg.1	SMAD4	SMAD family member 4	-0.753356	8.18286	0.0380953	7.5718	6.6184	8.3681	8.1163	8.3563	8.0148	8.5092	8.7691	8.5942	8.9104
TC1100007110.hg.1	FIBIN	fin bud initiation factor homolog (zebrafish)	0.636849	5.74135	0.0381645	6.3863	5.5909	6.129	6.3414	5.8513	5.2503	6.3287	5.4101	5.2933	4.8321
TC1800009289.hg.1	ACAA2	acetyl-CoA acyltransferase 2	-0.717474	7.26998	0.0382086	7.5439	6.3662	6.1222	6.9575	7.5664	7.0925	8.1609	7.6457	7.5494	7.6952
TC1900006586.hg.1	TMPRSS9	transmembrane protease. serine 9	0.540136	5.02409	0.0382544	5.8526	5.3758	5.4585	4.9428	4.841	5.1997	4.7645	4.7645	4.4968	4.5446
TC1900009137.hg.1	CBARP	CACN beta subunit associated regulatory protein	0.487213	6.71932	0.0383127	7.4806	7.1805	6.7418	6.9182	6.4935	6.6672	6.3177	6.5286	6.4313	6.4338
TC0400009904.hg.1	PPP2R2C	protein phosphatase 2 regulatory subunit Bgamma	1.25565	5.7411	0.0383139	5.308	7.5804	6.9414	7.2408	4.7739	6.2456	4.0721	4.7344	5.2777	5.2365
TC2200009262.hg.1	EIF3L	eukaryotic translation initiation factor 3 subunit L	-0.708793	7.95892	0.038365	7.4939	6.9347	7.8674	8.0639	7.6627	7.4886	8.2822	8.3554	9.2229	8.2175
TC0100018562.hg.1	AIDA	axin interactor. dorsalization associated	-0.565616	7.77784	0.0383931	7.6114	7.0522	6.9852	7.8789	7.9475	7.7229	8.5	7.9346	7.9944	8.1514
TC0400012644.hg.1	SORBS2	sorbin and SH3 domain containing 2	-1.43829	5.32482	0.0384157	5.0412	4.8409	4.6689	3.5224	4.9549	5.5414	7.4072	7.6915	5.8531	3.7266
TC0500009566.hg.1	CPLX2	complexin 2	0.519594	6.86134	0.0384621	7.3084	7.6638	7.0472	6.8857	6.7006	6.6265	6.9929	6.6727	6.4305	6.2852
TC1200011843.hg.1	SART3	squamous cell carcinoma antigen recognized by T-cells 3	-0.597432	5.98383	0.0385926	5.5015	4.975	5.7072	5.9375	6.3044	6.1532	6.1688	6.8362	6.0352	6.2193
TC1600010669.hg.1	DDX28	DEAD-box helicase 28	0.473144	4.98124	0.0386255	5.167	5.3458	4.9575	5.5184	5.1004	4.4661	5.1965	4.9068	4.4701	4.6839
TC1000011418.hg.1	FGFBP3	fibroblast growth factor binding protein 3	0.504793	5.86918	0.0386928	6.1944	6.4247	5.7894	6.3961	5.8033	5.1213	5.8913	5.5569	5.856	5.6585
TC0200011105.hg.1	CHRNG	cholinergic receptor nicotinic gamma subunit	0.496225	6.25188	0.0387133	6.8471	6.5897	6.7351	6.0216	6.3064	6.2608	5.8217	5.8005	6.3096	5.8261
TC0600013231.hg.1	SGK1	serum/glucocorticoid regulated kinase 1	-0.852463	4.90922	0.0387179	4.8542	3.8898	4.1568	4.8104	4.7037	4.4234	6.6707	5.1583	4.8841	5.5407
TC2000009209.hg.1	KCNS1	potassium voltage-gated channel modifier subfamily S member 1	0.504485	4.70545	0.0387442	5.3805	4.9475	5.1819	4.7518	4.5268	4.7811	4.7037	4.1861	4.3962	4.199
TC0X00010648.hg.1	RPL39	ribosomal protein L39	0.538735	9.69147	0.0387526	10.0826	10.1037	9.5958	9.7419	10.2802	9.1436	10.0751	9.0272	9.3768	9.4879
TC1000011726.hg.1	SH3PXD2A	SH3 and PX domains 2A	-0.49034	7.06776	0.0387909	6.6738	6.7387	6.5289	7.3403	6.8313	7.6218	7.278	6.88	7.3652	7.4196
TC1900010031.hg.1	COMP	cartilage oligomeric matrix protein	0.545192	6.22903	0.0388625	7.0765	6.5008	6.294	6.3746	6.2622	6.4363	6.2769	5.7783	5.5348	5.7557
TC1400009787.hg.1	SPTLC2	serine palmitoyltransferase long chain base subunit 2	-0.82354	6.73177	0.0388679	5.6139	5.9524	6.9266	5.6975	7.4096	6.9606	7.0839	7.4466	7.6829	6.5437
TC1100013144.hg.1	ZBED5	zinc finger BED-type containing 5	-0.416349	6.86485	0.0388819	6.9133	6.4242	6.83	6.5981	6.5178	7.2024	6.9042	6.9479	7.2707	7.0399
TC0900008484.hg.1	PRPF4	pre-mRNA processing factor 4	-0.599246	6.69276	0.0389691	6.2016	5.8048	6.6909	6.4157	6.8527	6.6754	6.7721	6.7716	7.0235	7.7193
TC2200009253.hg.1	MTFP1	mitochondrial fission process 1	0.496688	5.7413	0.0389846	5.9613	6.3858	6.2257	5.7597	5.6157	5.9563	5.3341	5.4215	5.2262	5.5267
TC1600011450.hg.1	SPIRE2	spire type actin nucleation factor 2	0.485451	6.43033	0.0390615	6.6728	6.7669	6.6994	6.1467	7.0795	6.5471	5.9541	6.139	6.0581	6.2397
TC2000009200.hg.1	RIMS4	regulating synaptic membrane exocytosis 4	0.486945	5.98527	0.0390622	6.1973	6.6121	6.1449	6.2502	5.9392	5.7427	5.5251	5.3219	6.0307	6.0886
TC0100008815.hg.1	IFI44L	interferon induced protein 44 like	1.77669	5.89851	0.0390932	7.612	7.4258	6.4707	4.8068	7.619	8.063	4.6522	3.9331	4.8422	3.5603
TC0900009825.hg.1	DDX58	DEXD/H-box helicase 58	0.855391	6.42311	0.0391201	6.5365	6.5523	7.2128	5.9528	7.9997	6.7564	5.8993	6.2533	5.8259	5.2423
TC1100009279.hg.1	OAF	out at first homolog	0.544236	8.07076	0.0391519	7.7615	7.9796	8.3238	8.6674	8.982	7.6898	7.7506	7.7338	7.9465	7.8725
TC0200006687.hg.1	HPCAL1	hippocalcin like 1	-0.645992	6.59721	0.0391672	5.463	6.0974	6.3398	6.4506	7.0202	6.3309	7.207	7.0216	6.8966	7.145
TC0100014243.hg.1	NDC1	NDC1 transmembrane nucleoporin	-0.567944	5.49932	0.0391687	5.5003	4.5841	4.8899	5.7583	5.3442	5.46	5.698	5.833	5.7219	6.2036
TC1300008443.hg.1	LNX2	ligand of numb-protein X 2	0.531965	4.53572	0.0391886	4.0165	5.1196	5.2158	4.837	4.8196	4.2723	4.2578	4.441	4.0981	4.2796
TC0600008064.hg.1	PPP2R5D	protein phosphatase 2 regulatory subunit B'delta	-0.471609	6.84646	0.0392509	6.8094	6.5202	6.3635	6.5042	6.8561	6.6143	7.1773	7.1436	7.4816	6.9946
TC0300013964.hg.1	PRSS50	protease. serine 50	0.390472	5.19161	0.0392792	5.4017	5.4205	5.4433	5.3017	5.367	5.1758	4.8986	4.823	5.2189	4.8655
TC1800008680.hg.1	CXXC1	CXXC finger protein 1	-0.402574	7.05354	0.039319	6.7818	7.0444	6.844	6.7084	6.8827	7.388	7.0228	7.4847	7.1075	7.2712
TC1800007969.hg.1	L3MBTL4	l(3)mbt-like 4 (Drosophila)	0.505499	6.90221	0.0393375	6.9726	7.3121	7.6745	7.1305	6.685	6.9062	6.536	6.915	6.4759	6.4142
TC0500012388.hg.1	DPYSL3	dihydropyrimidinase like 3	-1.45556	6.73256	0.0393436	6.6605	6.9285	6.0942	5.1022	5.2385	6.4711	8.8027	9.3347	6.9621	5.7311
TC0600009871.hg.1	ESR1	estrogen receptor 1	0.51087	6.04912	0.0393643	6.3962	6.898	5.895	5.9254	6.4081	5.7041	5.6889	5.7497	5.7055	6.1202
TC0800012371.hg.1	LY6E	lymphocyte antigen 6 complex. locus E	0.975725	10.3019	0.0393761	10.8328	10.0679	11.1447	9.8889	12.0145	10.8263	9.4393	9.0466	10.2915	9.4663
TC2000008915.hg.1	AHCY	adenosylhomocysteinase	0.441151	7.78442	0.0393849	8.0234	8.2038	7.9558	7.767	8.0751	7.2119	7.8234	7.4473	7.8686	7.4681
TC0800007245.hg.1	MAK16	MAK16 homolog	-0.654607	6.60897	0.0394269	5.9314	5.6877	6.4617	6.8572	6.4704	6.5019	6.7622	6.6116	7.0751	7.7305
TC0X00006581.hg.1	TBL1X	transducin beta like 1X-linked	-0.705004	7.90173	0.0395788	7.3143	7.3412	7.0794	7.576	8.4353	7.8045	8.2189	7.87	8.2188	9.1589
TC1000011026.hg.1	USP54	ubiquitin specific peptidase 54	-0.610339	6.19432	0.0396395	5.4467	6.1	5.726	5.9579	6.2152	6.3011	5.8418	6.635	6.4222	7.2973
TC1100011723.hg.1	RSF1	remodeling and spacing factor 1	-0.46723	7.87639	0.0396953	7.6984	7.2314	7.7879	7.7334	7.7628	8.1312	8.3321	8.4456	7.9081	7.7331
TC1700010076.hg.1	USP22	ubiquitin specific peptidase 22	-0.499401	9.26068	0.0397159	8.7542	8.6856	8.9818	9.1523	9.4809	9.2045	9.2131	9.8129	9.5574	9.764
TC1200009198.hg.1	LRRC43	leucine rich repeat containing 43	0.518166	6.01985	0.0397691	6.4292	6.4875	6.2861	6.1249	6.067	5.9831	6.1853	5.6809	5.89	5.0645
TC1700007771.hg.1	GSDMA	gasdermin A	0.490703	5.86552	0.0398717	6.3283	6.6192	5.7384	6.1207	5.7477	5.5552	5.669	5.8731	5.6201	5.3833
TC1900006932.hg.1	ZNF559-ZNF177	ZNF559-ZNF177 readthrough	-0.56305	6.27937	0.0399241	6.699	5.7957	6.1232	5.8726	5.4987	6.5191	6.1447	6.4437	6.9122	6.7849
TC0500007457.hg.1	SETD9	SET domain containing 9	-0.53954	5.13775	0.0399673	5.1426	4.6465	4.3893	4.9983	5.1632	5.4993	5.7486	5.4078	4.7788	5.6031
TC1700010693.hg.1	ACLY	ATP citrate lyase	-0.564287	8.39084	0.0401287	7.7552	7.5501	8.3013	8.155	8.7818	8.3893	8.7658	9.0304	8.4701	8.7093
TC0300010999.hg.1	MAP4	microtubule associated protein 4	-0.570539	9.61462	0.0401831	8.9554	8.8324	9.7558	9.4733	9.6298	9.2647	9.9473	10.0252	10.2452	10.017
TC0100010284.hg.1	PEA15	phosphoprotein enriched in astrocytes 15	-0.550907	9.70788	0.0401924	8.9735	9.2766	9.3975	9.8638	9.6508	9.3895	9.9856	9.8824	10.4418	10.2173
TC1400010616.hg.1	SLC38A6	solute carrier family 38 member 6	-0.663997	4.81173	0.040228	4.5784	3.9398	3.6461	4.9758	5.2587	5.0661	5.352	4.9761	5.2715	5.053
TC2000008678.hg.1	CST3	cystatin C	0.508186	10.5074	0.0402569	10.9053	10.7577	10.5782	10.7289	10.8376	10.2194	10.5152	9.6899	10.8172	10.0251
TC0100007574.hg.1	EPB41	erythrocyte membrane protein band 4.1	0.670383	4.70775	0.040262	5.4391	4.4235	4.8621	5.4594	5.0305	4.588	4.3016	4.1958	5.1552	3.6222
TC0200016443.hg.1	HCG2040054	uncharacterized LOC644093	-0.501633	5.66612	0.0403724	5.4335	5.2741	5.4238	5.6398	5.3053	5.6595	5.7738	5.8053	6.6558	5.6902
TC0500008470.hg.1	SNCAIP	synuclein alpha interacting protein	-1.4614	4.45105	0.0404598	3.8805	3.5329	4.1749	3.384	3.6294	3.8941	7.1805	6.9908	3.8367	4.0067
TC0900010624.hg.1	ZCCHC6	zinc finger CCHC-type containing 6	-0.470791	6.73324	0.0405529	6.4728	6.0607	6.3458	6.8042	6.8057	7.0256	6.9606	6.7097	6.8501	7.2971
TC1100010105.hg.1	GALNT18	polypeptide N-acetylgalactosaminyltransferase 18	0.500941	5.58718	0.040576	5.7748	6.5515	5.6766	5.4779	5.7075	5.1363	5.4392	5.5115	5.3641	5.2325
TC1200009248.hg.1	DDX55	DEAD-box helicase 55	-0.456472	5.4543	0.040591	5.504	5.1929	5.1808	5.2772	4.9753	5.9595	5.8411	5.2786	5.8929	5.4405
TC1600009202.hg.1	CREBBP	CREB binding protein	-0.452788	8.97787	0.0406052	8.5331	8.5398	8.85	8.7659	9.0687	9.6091	8.9923	9.2967	8.9352	9.188
TC0900009978.hg.1	GNE	glucosamine (UDP-N-acetyl)-2-epimerase/N-acetylmannosamine kinase	-0.466232	5.95181	0.0406833	5.4135	5.518	6.0962	5.6547	5.9111	5.8184	6.4245	6.0564	6.2312	6.3942
TC1200012593.hg.1	CLEC4A	C-type lectin domain family 4 member A	0.465193	5.06106	0.0406921	5.3321	5.1762	5.2368	5.5481	5.1751	5.1772	5.2146	4.624	4.6493	4.4771
TC0800010949.hg.1	SNX16	sorting nexin 16	-0.845164	5.72383	0.0407011	5.4632	4.4303	5.5482	5.1222	5.9423	5.8029	6.003	5.8159	5.6059	7.5043
TC0100015984.hg.1	UBQLN4	ubiquilin 4	-0.592054	8.07323	0.0407219	7.3097	7.5431	7.8033	7.7845	8.4453	8.5147	7.8198	8.1671	8.4125	8.9321
TC0100015867.hg.1	S100A3	S100 calcium binding protein A3	0.39832	5.36395	0.0407378	5.5715	5.58	5.6975	5.5604	5.406	5.3716	5.23	5.3013	5.0423	4.8788
TC1900011253.hg.1	C19orf84	chromosome 19 open reading frame 84	0.536582	8.68478	0.0408401	9.1753	9.2591	8.9112	8.8054	8.6143	9.0016	8.6487	8.4012	7.9284	8.1025
TC1300007187.hg.1	TRIM13	tripartite motif containing 13	-0.754163	5.83387	0.0408472	5.4217	4.4922	5.7442	5.8563	5.7695	5.8133	6.1643	6.8337	5.4381	6.8054
TC2100007465.hg.1	PCNT	pericentrin	-0.649489	5.49037	0.040879	4.8166	4.7479	4.9771	5.6752	5.6114	6.113	5.8162	5.1551	5.5093	6.482
TC1700012110.hg.1	SECTM1	secreted and transmembrane 1	0.578245	6.12992	0.0409444	6.2181	6.2976	6.353	6.2476	6.9789	6.6139	5.807	5.5255	5.8707	5.3869
TC1300006890.hg.1	EXOSC8	exosome component 8	-0.824169	5.28812	0.0409903	4.6461	3.9216	5.0901	5.0998	5.6225	5.5867	5.5829	5.3173	5.1441	6.8701
TC0X00008332.hg.1	STAG2	stromal antigen 2	-0.612923	5.57103	0.041028	5.3828	4.7352	5.2976	5.1761	5.7311	5.1858	6.3215	5.6088	5.8472	6.4242
TC1700012361.hg.1	CDRT1	CMT1A duplicated region transcript 1	0.450807	4.78909	0.0410415	5.0614	5.1235	5.1915	4.9954	4.7007	5.0701	4.506	4.5029	4.4213	4.3181
TC1200009748.hg.1	ZNF384	zinc finger protein 384	-0.487313	7.0757	0.041064	6.5806	6.6725	6.6765	6.9933	7.2374	7.1215	7.1119	7.2558	7.8731	7.2345
TC1200012210.hg.1	MORN3	MORN repeat containing 3	0.437083	5.97191	0.0410962	6.0559	6.5132	6.1812	6.3356	5.8665	5.9166	5.9726	5.5124	5.7864	5.5788
TC0900008091.hg.1	ERCC6L2	ERCC excision repair 6 like 2	-0.52216	6.17689	0.0412606	6.0662	5.6309	5.9446	6.0203	5.917	6.8231	5.9289	6.3124	6.9856	6.1398
TC0700010857.hg.1	GLI3	GLI family zinc finger 3	-0.680008	7.36925	0.0413317	7.2732	6.1592	6.9151	7.0071	7.7915	8.0483	8.086	7.9051	7.2448	7.262
TC0200007040.hg.1	C2orf70	chromosome 2 open reading frame 70	0.424774	4.64664	0.0413346	4.6948	5.2159	5.0157	4.5456	4.8232	4.5829	4.5169	4.3631	4.2442	4.4641
TC0500007143.hg.1	SKP2	S-phase kinase associated protein 2	-0.572449	5.60499	0.0413377	5.4185	5.0705	5.0993	5.2639	5.7416	6.139	5.468	5.7879	5.4459	6.6152
TC1100013071.hg.1	POLD3	DNA polymerase delta 3. accessory subunit	-0.55623	5.58721	0.041386	4.983	5.2535	5.2999	5.2988	5.7103	5.71	5.5447	5.6822	5.6884	6.7013
TC0X00011402.hg.1	SPANXA1	sperm protein associated with the nucleus. X-linked. family member A1	0.47293	6.4625	0.0413888	6.815	7.116	6.7069	6.5914	6.2656	6.2184	6.615	6.2509	6.0034	6.0425
TC1900006626.hg.1	CELF5	CUGBP. Elav-like family member 5	0.4699	5.66301	0.041391	6.1186	6.235	5.7076	5.8659	5.5627	5.7421	5.6089	5.3817	5.3745	5.0333
TC0200011965.hg.1	ATAD2B	ATPase family. AAA domain containing 2B	-0.542611	5.04614	0.0414187	4.9305	4.3749	4.8694	4.3433	5.3561	5.7221	5.4736	5.1582	5.2844	4.9489
TC0900008811.hg.1	STXBP1	syntaxin binding protein 1	-0.618609	8.25452	0.0414629	7.7878	7.8685	7.7075	8.3348	8.0275	8.6434	7.9442	8.1611	8.5982	9.4721
TC0100015891.hg.1	CRTC2	CREB regulated transcription coactivator 2	-0.531324	8.07083	0.0415603	7.4985	7.655	7.5635	7.842	8.4668	8.776	8.2203	8.4635	7.9437	8.2789
TC1700009974.hg.1	SHMT1	serine hydroxymethyltransferase 1	0.448369	6.87412	0.0415824	7.302	7.1542	7.0692	6.9042	7.062	6.3716	6.672	7.0304	6.2983	6.8773
TC0900008202.hg.1	TGFBR1	transforming growth factor beta receptor 1	-0.459232	8.18045	0.0416024	8.1261	7.9083	8.2472	7.6444	7.8282	8.4713	8.0952	8.2	8.467	8.8168
TC0200015601.hg.1	KANSL1L	KAT8 regulatory NSL complex subunit 1 like	0.651653	7.83522	0.041615	7.7806	8.22	7.9821	8.4372	8.3853	7.8403	7.4559	7.21	8.3523	6.6884
TC0900011217.hg.1	PTBP3	polypyrimidine tract binding protein 3	-0.621021	8.16776	0.041623	7.6079	7.7492	7.8865	7.4772	8.5655	8.8047	8.2618	7.9048	8.2995	9.1206
TC0400008943.hg.1	EDNRA	endothelin receptor type A	-0.894689	6.90503	0.0416321	7.3392	6.327	6.3566	7.0068	5.2587	6.9301	8.4482	7.2352	6.7796	7.3688
TC0700010435.hg.1	CDCA7L	cell division cycle associated 7 like	-0.53499	6.45807	0.0416354	6.1306	5.9782	6.4432	6.0929	6.3079	7.0351	6.1923	6.4913	6.5394	7.3698
TC0600013433.hg.1	SF3B5	splicing factor 3b subunit 5	0.590752	7.58283	0.0417069	7.6639	8.152	7.8597	7.8369	7.8785	6.4966	7.4128	6.9432	7.678	7.9066
TC0800012299.hg.1	HOOK3	hook microtubule tethering protein 3	-0.510337	6.30035	0.0417074	6.1705	5.5423	6.3563	6.1381	6.0187	6.4852	7.0225	6.2312	6.2419	6.7967
TC1700011171.hg.1	COX11	COX11. cytochrome c oxidase copper chaperone	-0.5355	6.66044	0.0417325	6.1523	5.8591	6.8371	6.6462	6.4687	6.44	7.0133	7.1771	6.7854	7.2252
TC0800007949.hg.1	TERF1	telomeric repeat binding factor 1	-0.719867	6.82886	0.0417589	6.4563	5.9704	6.4651	6.7014	6.7514	6.1547	7.2209	7.5578	6.9141	8.0965
TC2100007996.hg.1	TMEM50B	transmembrane protein 50B	-0.816859	7.09522	0.0417615	5.6731	6.2126	7.1457	7.309	7.0936	7.5627	8.1208	8.0104	6.72	7.1043
TC0200015425.hg.1	TRAK2	trafficking kinesin protein 2	-0.531157	7.97778	0.0418261	7.8142	7.5106	7.7155	8.0032	7.5175	7.687	8.2198	8.4352	8.8862	7.9886
TC1100012984.hg.1	NAT10	N-acetyltransferase 10	-0.731149	6.48322	0.0418461	5.6754	5.3727	6.2144	6.3496	6.9762	6.5512	6.1661	6.9158	7.1202	7.4907
TC1900010951.hg.1	SNRPD2	small nuclear ribonucleoprotein D2 polypeptide	0.443056	7.40737	0.0418568	7.698	7.55	7.633	7.5833	7.6803	6.628	7.3111	7.3368	7.1663	7.487
TC1000012561.hg.1	JMJD1C	jumonji domain containing 1C	-0.597211	7.43871	0.0418642	6.8299	6.4598	7.7662	7.2106	7.4339	8.083	7.5547	8.0733	7.3493	7.6263
TC1000008236.hg.1	TSPAN14	tetraspanin 14	-0.739439	7.08752	0.0419068	6.1644	6.167	6.9176	6.9296	7.4103	7.0726	7.2161	6.9157	7.6407	8.4411
TC2200007787.hg.1	MOV10L1	Mov10 RISC complex RNA helicase like 1	0.424878	5.17051	0.0419095	5.4899	5.5718	5.1938	5.4338	5.2255	5.2998	4.6672	5.027	4.768	5.0283
TC0600008379.hg.1	MTRNR2L9	MT-RNR2-like 9	0.482747	9.49025	0.0419772	9.9774	10.1511	9.4846	9.7039	9.3412	9.0045	8.9849	9.2922	9.5043	9.4584
TC0500010580.hg.1	PRKAA1	protein kinase AMP-activated catalytic subunit alpha 1	-0.523363	8.77094	0.0420198	8.2858	8.3724	8.5951	8.4214	8.8717	9.4112	8.6803	8.4871	9.1587	9.4258
TC1300008963.hg.1	DLEU7	deleted in lymphocytic leukemia. 7	0.51722	5.53455	0.0421707	6.0708	6.242	5.4361	5.5641	5.6528	5.4197	5.708	5.3606	4.979	4.9124
TC0500012206.hg.1	PROB1	proline rich basic protein 1	0.537782	7.35145	0.0421763	7.978	8.1437	7.5901	7.2608	7.1291	6.6269	7.2466	7.1217	7.1398	7.2778
TC0600006714.hg.1	FAM50B	family with sequence similarity 50 member B	0.406363	6.12132	0.0421951	6.3043	6.4229	6.0948	6.2372	6.5634	6.0583	5.9432	5.7428	6.1293	5.7172
TC0600007169.hg.1	HDGFL1	hepatoma derived growth factor-like 1	0.477608	6.21236	0.0421955	6.5373	6.9339	6.2522	6.32	6.2125	6.1046	6.3326	5.9312	5.9243	5.5751
TC0700013460.hg.1	METTL2B	methyltransferase like 2B	-0.443391	7.51809	0.042234	7.3977	6.9404	7.4622	7.2981	7.3835	7.3705	7.5471	8.0184	7.866	7.897
TC0500007945.hg.1	ATG10	autophagy related 10	-0.480344	4.76953	0.0422478	4.4958	4.4382	4.5789	4.4363	4.6977	5.4269	4.665	4.9744	4.5806	5.4017
TC0100006852.hg.1	UBIAD1	UbiA prenyltransferase domain containing 1	-0.430884	7.86453	0.0422996	7.5232	7.3143	7.6573	8.0334	7.7172	7.8619	7.9488	8.1596	8.2757	8.1537
TC0400012756.hg.1	CFAP99	cilia and flagella associated protein 99	0.407095	6.21706	0.0423543	6.2437	6.7422	6.4913	6.4347	6.1911	6.0911	6.1645	5.824	6.0685	5.9194
TC0100015636.hg.1	GJA5	gap junction protein alpha 5	-0.75509	6.32371	0.0424527	5.8665	5.655	5.8736	5.3007	7.035	6.5169	7.1382	7.2018	6.7651	5.8842
TC1700008984.hg.1	SEC14L1	SEC14 like lipid binding 1	-0.562045	7.90254	0.0425026	7.4138	7.2161	7.9283	7.8887	7.6607	7.9371	8.2616	8.8295	8.3019	7.5878
TC1700011476.hg.1	GNA13	G protein subunit alpha 13	-0.546464	7.92142	0.0425461	7.2901	7.6818	7.891	7.6287	7.7493	7.7681	8.0764	9.0155	8.1336	7.9797
TC1900011827.hg.1	ZNF8	zinc finger protein 8	-0.489313	6.5263	0.0425979	6.1049	5.8824	6.5382	6.6659	6.2168	6.93	6.3982	6.5531	6.8666	7.107
TC1700010540.hg.1	PCGF2	polycomb group ring finger 2	-0.719354	8.30885	0.0426447	7.7333	7.304	8.0916	7.6261	8.9908	8.7794	8.4836	9.2893	8.7581	8.0321
TC1600010023.hg.1	ZNF843	zinc finger protein 843	0.528801	5.41513	0.0426553	5.9333	5.8516	5.9251	5.3092	5.3784	5.7746	4.8299	5.296	4.8829	4.9702
TC0900012039.hg.1	ANAPC2	anaphase promoting complex subunit 2	0.424773	8.42224	0.0427749	8.8926	8.8561	8.3017	8.5884	8.5343	8.0527	8.3599	8.0579	8.4419	8.1368
TC2200007150.hg.1	TIMP3	TIMP metallopeptidase inhibitor 3	-0.707306	11.2036	0.0427823	11.5881	10.7163	10.8544	11.1375	9.9535	11.9491	11.6312	11.102	12.0985	11.0056
TC0500008582.hg.1	ISOC1	isochorismatase domain containing 1	-0.520726	6.8225	0.0428034	6.311	6.7882	6.4147	6.642	6.6548	7.0243	6.5181	7.1742	6.9455	7.7522
TC2100007354.hg.1	AIRE	autoimmune regulator	0.412147	7.76859	0.0428182	8.101	8.1904	7.8471	7.9084	7.8264	7.9447	7.3732	7.5234	7.4661	7.5052
TC1500009002.hg.1	ACTC1	actin. alpha. cardiac muscle 1	0.441548	5.46786	0.0428686	5.8574	5.6244	5.9188	5.703	5.3396	4.9975	5.3372	5.4494	5.4926	4.9588
TC0200008291.hg.1	KDM3A	lysine demethylase 3A	-0.521154	4.91772	0.042885	4.7931	4.6052	4.4322	4.4664	4.9888	5.5285	5.5483	5.2246	5.0945	4.4956
TC1700007419.hg.1	TAOK1	TAO kinase 1	-0.410642	8.19294	0.0428882	8.0144	7.5983	8.1511	7.9442	8.2301	8.578	8.3952	8.3849	8.3822	8.251
TC0X00010169.hg.1	BRWD3	bromodomain and WD repeat domain containing 3	-0.555666	5.15309	0.0429784	4.6028	4.8294	5.204	5.0851	4.655	5.8601	5.1109	6.0055	4.9081	5.27
TC0200016543.hg.1	RIF1	replication timing regulatory factor 1	-0.563529	6.72483	0.0430765	6.1279	5.8044	6.9544	6.4486	6.88	7.376	6.7193	7.1656	6.7896	6.9825
TC2200009198.hg.1	P2RX6	purinergic receptor P2X 6	0.386345	6.41083	0.0432254	6.5797	6.7603	6.6539	6.738	6.2882	6.1256	6.1417	6.2347	6.2562	6.33
TC1200010900.hg.1	SMARCC2	SWI/SNF related. matrix associated. actin dependent regulator of chromatin subfamily c member 2	-0.466982	9.55714	0.0432651	9.1058	8.895	9.4028	9.5245	9.6901	9.7185	9.4431	10.0105	9.8194	9.9616
TC0700010563.hg.1	HOXA7	homeobox A7	0.74729	8.23559	0.043327	8.5307	8.6427	8.2968	9.2586	8.3174	7.3726	8.613	6.8922	8.5321	7.8998
TC0500013015.hg.1	PHYKPL	5-phosphohydroxy-L-lysine phospho-lyase	-0.578075	6.57669	0.0433355	6.1679	5.926	6.391	6.1942	6.7591	7.601	6.5551	6.4842	6.5329	7.1555
TC0100015588.hg.1	RNF115	ring finger protein 115	-0.484828	7.34413	0.0433731	7.3108	7.1261	6.6091	7.2262	7.2363	7.5944	7.7668	7.151	7.4329	7.9877
TC1400010625.hg.1	ZNF410	zinc finger protein 410	-0.743395	4.79496	0.0433812	4.3074	3.9952	4.5555	3.982	5.2762	4.0647	5.6151	5.1691	5.4319	5.5525
TC1500009709.hg.1	CA12	carbonic anhydrase 12	0.464991	4.84859	0.0434594	5.0804	5.547	4.865	5.0575	4.8554	5.089	4.5147	4.4836	4.575	4.4181
TC1700011369.hg.1	MED13	mediator complex subunit 13	-0.551243	8.92198	0.0434695	8.6015	8.4172	8.562	8.4111	9.2401	9.5888	8.8224	9.676	8.7804	9.1204
TC0X00010921.hg.1	MMGT1	membrane magnesium transporter 1	-0.562692	7.61174	0.0434701	6.987	6.9884	7.4651	7.8464	7.365	7.3757	7.8607	7.672	8.0343	8.5227
TC0700013361.hg.1	ZNF713	zinc finger protein 713	-0.592161	5.05087	0.0434753	4.509	4.3178	4.7583	5.0585	5.1304	5.4262	5.8454	5.4022	5.5458	4.5152
TC1100011035.hg.1	CPSF7	cleavage and polyadenylation specific factor 7	-0.47071	7.59888	0.0435272	7.0401	7.5548	7.327	7.1094	7.7863	8.1805	7.5465	7.9399	7.6297	7.8746
TC0500013414.hg.1	THOC3	THO complex 3	-0.872802	5.92837	0.0435645	4.8531	5.2471	5.4397	5.7533	6.1667	5.8514	6.0762	6.1496	5.8193	7.9274
TC0200007746.hg.1	B3GNT2	UDP-GlcNAc:betaGal beta-1.3-N-acetylglucosaminyltransferase 2	0.432842	6.17714	0.0436157	6.4796	6.2311	6.8674	6.1144	6.2754	5.786	6.1653	5.952	5.9292	5.971
TC0100010518.hg.1	DCAF6	DDB1 and CUL4 associated factor 6	-0.575014	7.28543	0.0436382	6.8115	6.7421	6.5157	7.4364	7.484	7.1515	7.9172	7.7118	7.9096	7.1746
TC1900011124.hg.1	C19orf73	chromosome 19 open reading frame 73	0.49112	5.82239	0.0437002	6.4046	6.3562	5.9879	6.0847	5.5065	5.5685	5.8898	5.6479	5.5897	5.1882
TC0X00011185.hg.1	MECP2	methyl-CpG binding protein 2	-0.367468	6.50211	0.0437921	6.1596	6.4113	6.3879	6.3856	6.2474	6.7586	6.6789	6.5194	6.7074	6.7648
TC1400010728.hg.1	HEATR5A	HEAT repeat containing 5A	-0.475109	4.88874	0.0438106	4.2808	4.7286	4.7302	4.6308	4.8855	5.0872	5.2231	5.4952	5.2533	4.5726
TC0600008109.hg.1	VEGFA	vascular endothelial growth factor A	-0.959875	8.86874	0.0438438	8.7367	7.6814	8.8952	7.8436	8.7871	9.851	8.5038	8.1036	9.9638	10.3211
TC0200013357.hg.1	KRCC1	lysine rich coiled-coil 1	0.38641	6.81497	0.0438496	7.1316	7.1738	6.986	6.9419	6.8075	6.4508	6.8699	6.608	6.5852	6.595
TC1000012389.hg.1	ADAM8	ADAM metallopeptidase domain 8	0.439737	6.70801	0.0438783	7.1082	7.201	6.8974	6.7548	6.6779	6.8239	6.6873	6.2189	6.4084	6.3023
TC2200008655.hg.1	CARD10	caspase recruitment domain family member 10	0.511846	6.23861	0.0439146	6.7922	6.375	6.2739	5.9207	7.1108	6.1444	6.0315	5.9766	5.8607	5.9003
TC0800009113.hg.1	PTP4A3	protein tyrosine phosphatase type IVA. member 3	0.85215	10.2839	0.0439185	9.9673	11.0811	10.7563	11.0501	10.695	10.6566	8.8504	8.9741	10.6012	10.2069
TC0600013177.hg.1	MED23	mediator complex subunit 23	-0.50935	6.52051	0.0439659	5.9081	6.3781	6.7071	5.7524	6.5835	6.7866	6.3923	6.8916	6.866	6.9395
TC0800009826.hg.1	NUDT18	nudix hydrolase 18	0.415802	6.68669	0.0440736	7.274	6.9455	6.5887	6.8857	6.779	6.7103	6.3519	6.3765	6.5123	6.4429
TC0900012029.hg.1	ENTPD2	ectonucleoside triphosphate diphosphohydrolase 2	0.45831	5.08508	0.0440973	5.2599	5.3717	5.6559	4.966	5.3178	5.018	4.6561	5.2468	4.8403	4.5184
TC1100012094.hg.1	PGR	progesterone receptor	-1.1292	3.75161	0.0441972	2.2213	2.4374	2.4374	3.8158	5.0233	4.7565	4.2316	3.394	4.1205	5.0784
TC0200010859.hg.1	SLC4A3	solute carrier family 4 member 3	0.509634	6.12343	0.0442074	6.342	6.695	6.2822	6.4168	6.1552	6.6126	5.8546	5.6912	5.6228	5.5618
TC0200012252.hg.1	STRN	striatin	-0.404819	6.81836	0.0442197	6.4092	6.4294	6.8831	6.7495	6.6086	7.3077	6.9009	7.0063	6.8991	6.9899
TC1300009348.hg.1	SPRY2	sprouty RTK signaling antagonist 2	-1.02819	6.08959	0.044224	6.4073	4.6435	5.8214	5.9324	5.0729	6.3172	8.2004	6.6259	5.408	6.4669
TC1200007359.hg.1	CNTN1	contactin 1	1.88215	7.45002	0.0442277	8.1394	8.7898	8.4176	9.6461	6.9627	4.4492	5.7886	8.9983	8.576	4.7326
TC0300009353.hg.1	PPM1L	protein phosphatase. Mg2+/Mn2+ dependent 1L	-0.818433	6.34604	0.0443615	6.4508	5.2947	5.4538	6.5763	5.9086	6.3099	5.6901	7.1099	7.5841	7.0824
TC0400006540.hg.1	FGFR3	fibroblast growth factor receptor 3	0.457221	4.69019	0.0443956	4.7891	5.1478	5.1347	4.65	4.8724	4.2781	4.3471	4.1562	4.5857	4.9408
TC0400011440.hg.1	PPP3CA	protein phosphatase 3 catalytic subunit alpha	-0.561871	7.91908	0.0443981	7.7739	7.1451	7.7347	8.0599	7.4771	7.546	8.6956	8.4676	8.2936	7.9973
TC0300011167.hg.1	BAP1	BRCA1 associated protein 1	-0.610885	6.143	0.0444005	5.5389	5.4216	5.8546	6.1977	6.1749	5.6619	6.3068	6.3845	6.9069	6.9821
TC0100007184.hg.1	OTUD3	OTU deubiquitinase 3	-0.512545	4.87162	0.0444304	4.736	4.744	4.555	4.6175	4.4242	5.8886	5.1704	5.0566	4.7771	4.7468
TC0200016345.hg.1	PASK	PAS domain containing serine/threonine kinase	0.436278	6.4711	0.0445046	6.9237	6.9319	6.3562	6.6949	6.5394	6.379	6.0902	6.5938	6.0618	6.14
TC0100018506.hg.1	YY1AP1	YY1 associated protein 1	-0.437453	8.74167	0.0445451	8.5104	8.1441	8.3485	8.6381	8.9736	9.049	8.7366	8.9695	9.0783	8.9686
TC1000010411.hg.1	ZNF33B	zinc finger protein 33B	-0.527559	6.12802	0.0445879	5.7724	5.3119	5.9554	5.826	6.4555	6.7092	5.9759	6.6414	6.3858	6.2468
TC1000010249.hg.1	KIF5B	kinesin family member 5B	-0.425089	8.77475	0.0446093	8.4899	8.1989	8.9635	8.7679	8.3908	9.0812	8.9748	8.9077	8.9213	9.0515
TC1000012538.hg.1	MTPAP	mitochondrial poly(A) polymerase	-0.502139	6.98572	0.0446164	7.0875	6.732	6.281	6.7782	6.7946	7.083	6.8772	7.2965	7.0999	7.8274
TC0200013113.hg.1	LOXL3	lysyl oxidase like 3	0.480218	5.46609	0.0446788	5.5127	5.6709	5.8859	5.6343	5.8272	5.2279	5.4718	4.6458	5.69	5.0944
TC1700012283.hg.1	LUC7L3	LUC7 like 3 pre-mRNA splicing factor	-0.645844	8.47147	0.0447349	8.0579	7.7296	8.2581	8.07	8.6272	9.485	8.3795	9.3916	8.1111	8.6047
TC1400008486.hg.1	CRIP2	cysteine rich protein 2	0.572782	7.47266	0.0447361	7.5989	7.5037	7.5377	7.9791	8.1758	6.517	7.6271	7.277	7.665	6.8452
TC1100012131.hg.1	MMP1	matrix metallopeptidase 1	-1.38987	9.10847	0.0447384	6.2871	8.6868	8.3455	9.0314	9.7168	9.573	11.1179	8.919	10.8369	8.5703
TC1900011752.hg.1	ZNF223	zinc finger protein 223	-0.55696	5.09404	0.0447447	4.5583	4.393	5.3806	4.9089	4.837	5.3664	4.7669	5.9176	5.3745	5.4372
TC1300007218.hg.1	FAM124A	family with sequence similarity 124 member A	0.417204	6.82529	0.0448088	7.0389	7.0563	7.0969	6.6842	7.2932	6.8257	6.3259	6.5571	6.7797	6.595
TC1700007931.hg.1	IFI35	interferon induced protein 35	0.438	6.89248	0.0449642	6.9659	7.0765	7.2428	6.8463	7.4259	6.5708	6.4326	6.476	7.0094	6.8786
TC0100017321.hg.1	GPATCH2	G-patch domain containing 2	-0.528124	5.44856	0.0450497	5.0757	5.6631	4.6044	5.1697	5.4096	5.9375	5.5993	5.496	5.3785	6.1518
TC1200009868.hg.1	DDX12P	DEAD/H-box helicase 12. pseudogene	-0.825187	6.17937	0.0450578	5.2814	6.2854	5.7509	5.6738	5.8424	8.1252	6.0759	6.1657	5.9917	6.6014
TC1900009991.hg.1	JAK3	Janus kinase 3	0.702329	8.08964	0.0450878	8.2812	8.4063	8.5092	8.3954	8.6118	8.8239	6.9793	7.0408	7.7288	8.1196
TC1600009958.hg.1	LOC613037	nuclear pore complex interacting protein member	-0.69299	8.06566	0.0451282	7.3648	8.2881	7.5917	7.556	7.7952	9.5465	7.826	8.1469	8.0192	8.5222
TC0200010438.hg.1	NDUFB3	NADH:ubiquinone oxidoreductase subunit B3	0.564494	6.92519	0.0451586	7.3237	7.1655	7.1153	7.4096	7.023	6.5832	7.3966	6.7015	6.6846	5.8488
TC0200008259.hg.1	MAT2A	methionine adenosyltransferase 2A	-0.575768	8.54992	0.0454113	8.1865	7.6931	8.0924	8.1772	9.161	8.8636	8.634	8.7007	8.7585	9.2322
TC1000011681.hg.1	C10orf95	chromosome 10 open reading frame 95	0.409693	6.24362	0.0454268	6.5656	6.502	6.6787	6.2138	6.2823	5.8213	6.1834	6.0585	5.8446	6.286
TC0900010854.hg.1	NUTM2F	NUT family member 2F	0.513105	5.87711	0.0454403	6.3279	6.6548	6.1513	6.1142	5.4201	5.9034	5.6513	5.5216	5.5999	5.4266
TC0600011535.hg.1	RGL2	ral guanine nucleotide dissociation stimulator like 2	-0.445313	8.39311	0.0454968	8.1185	7.8339	8.167	8.0721	8.6609	8.3571	8.5013	8.6174	8.8556	8.7475
TC1100009740.hg.1	MOB2	MOB kinase activator 2	0.497579	7.1109	0.0455258	7.5382	7.7284	7.3607	7.3125	6.8586	6.7561	7.3043	7.0328	6.4346	6.7827
TC0600011478.hg.1	FKBPL	FK506 binding protein like	0.435261	5.81297	0.0455633	6.2557	6.0632	6.1353	6.0292	5.6697	5.5416	5.8143	5.1775	5.8035	5.6398
TC0400012828.hg.1	BANK1	B-cell scaffold protein with ankyrin repeats 1	1.30534	5.44072	0.0456087	6.208	6.5434	6.0133	6.3608	5.3414	5.6138	6.6381	3.0786	5.3292	3.2807
TC0500007729.hg.1	MCCC2	methylcrotonoyl-CoA carboxylase 2	-0.514417	6.71745	0.0456281	6.5048	6.2842	6.1777	6.3176	7.0169	6.5803	6.736	6.9302	7.1217	7.505
TC0800008150.hg.1	CPNE3	copine 3	-0.543544	7.3293	0.0456601	6.7791	6.635	7.4714	6.9758	7.4263	7.1487	7.6139	8.0601	7.2926	7.8902
TC0500008558.hg.1	PRRC1	proline rich coiled-coil 1	-0.4514	8.05959	0.0456899	7.8887	7.7128	7.4911	7.8842	8.1927	8.7055	8.3056	8.0975	8.002	8.3159
TC1500009639.hg.1	ICE2	interactor of little elongation complex ELL subunit 2	-0.570642	5.28779	0.0458143	5.2803	4.3828	5.3406	5.2977	4.7109	5.4348	5.5469	5.0928	6.1791	5.6119
TC0500010813.hg.1	MIER3	MIER family member 3	-0.624477	5.50675	0.0458484	5.4516	4.6158	5.1514	5.2302	5.5235	6.1127	5.2991	5.1345	6.1312	6.4175
TC0900008951.hg.1	HMCN2	hemicentin 2	0.47478	5.09014	0.0458789	5.3756	5.8955	5.3184	5.3047	4.7435	4.962	4.767	4.9595	4.7808	4.7945
TC0600009426.hg.1	LAMA2	laminin subunit alpha 2	-0.824908	6.00132	0.0459421	6.4137	6.0967	4.2537	5.5387	5.6415	6.9341	6.9577	5.9525	6.2364	5.9882
TC0100017860.hg.1	HEATR1	HEAT repeat containing 1	-0.56086	6.85879	0.0459497	6.5183	6.4361	5.8771	6.827	7.2334	7.4388	6.8172	6.9415	7.1196	7.3789
TC1700011002.hg.1	PRAC1	prostate cancer susceptibility candidate 1	0.43452	5.71051	0.0459843	6.2177	5.8144	5.9874	6.0626	5.5568	5.8842	5.4457	5.3756	5.2955	5.4652
TC1100013052.hg.1	RBM4	RNA binding motif protein 4	-0.502091	7.92761	0.0459868	7.4882	7.3102	7.9415	7.6658	7.9771	7.6353	8.1165	8.2275	8.2362	8.6778
TC0100017834.hg.1	GNG4	G protein subunit gamma 4	0.622229	5.20499	0.0460222	5.9163	4.9634	5.3651	5.2828	6.0529	4.4457	5.1279	5.1429	4.3151	5.4377
TC1900010533.hg.1	ZNF850	zinc finger protein 850	-0.617385	4.95768	0.0460522	4.2794	4.171	4.2785	5.0205	5.4956	5.3498	5.0048	5.2871	4.9608	5.7293
TC1400010704.hg.1	CRIP1	cysteine rich protein 1	0.685088	5.11011	0.0461154	5.5866	5.8395	4.902	5.6899	5.2453	4.7853	5.8244	4.4012	4.7701	4.0568
TC2200007319.hg.1	GCAT	glycine C-acetyltransferase	0.559102	5.95067	0.0461274	6.1269	6.6308	6.2903	6.4635	5.6395	5.3575	6.3627	5.755	5.5384	5.3419
TC2200008592.hg.1	APOL2	apolipoprotein L2	0.524868	7.24407	0.0463561	7.4024	7.5256	8.2335	7.0488	7.3222	7.0799	6.7406	6.6921	7.2928	7.1027
TC0300007645.hg.1	PTPRG	protein tyrosine phosphatase. receptor type G	-0.846521	7.78904	0.0463756	7.4937	7.0912	7.6803	7.1394	7.4243	7.2271	9.6622	8.5914	7.5062	8.0746
TC1900009636.hg.1	KRI1	KRI1 homolog	0.679896	7.60235	0.0464085	8.322	8.5112	7.7455	7.8289	7.304	7.4641	8.1521	7.159	6.8938	6.6429
TC0100007147.hg.1	PAX7	paired box 7	0.433747	5.28604	0.0464624	5.5605	5.7722	5.4482	5.6737	5.06	4.9797	4.9909	5.3703	4.8456	5.1594
TC1300006594.hg.1	TNFRSF19	TNF receptor superfamily member 19	-0.876296	7.36601	0.0464987	6.5551	5.9838	7.4154	6.8243	7.8607	7.5832	7.255	8.0065	7.1864	8.9897
TC0600014106.hg.1	CFB	complement factor B	1.6629	6.96239	0.0465519	7.0903	7.0119	9.1964	6.3194	9.3513	5.7907	5.8785	3.8158	7.2735	7.8962
TC0900011955.hg.1	CAMSAP1	calmodulin regulated spectrin associated protein 1	-0.470143	5.67009	0.0466371	5.4965	5.0704	5.5839	5.63	5.3944	5.3112	6.0469	6.0875	5.8858	6.1944
TC1900007110.hg.1	RAD23A	RAD23 homolog A. nucleotide excision repair protein	-0.465323	7.85209	0.0468046	7.2721	7.5338	7.5282	8.1168	7.6462	7.8559	7.9038	8.0356	8.1093	8.5192
TC1800007059.hg.1	DTNA	dystrobrevin alpha	0.902767	4.67189	0.0468675	5.4304	5.7966	4.5479	6.1438	3.6977	4.6833	4.38	3.5382	4.2852	4.2159
TC0800007738.hg.1	SDCBP	syndecan binding protein	-0.664655	9.29474	0.0471001	8.9383	8.9817	8.9254	8.8161	9.1505	8.4678	10.0951	9.5595	9.6456	10.3672
TC0400012826.hg.1	HERC3	HECT and RLD domain containing E3 ubiquitin protein ligase 3	-0.535468	6.63228	0.04714	6.6239	5.9853	6.6936	6.1582	6.3618	7.452	6.4245	7.2056	6.9061	6.5118
TC1900007127.hg.1	IER2	immediate early response 2	-1.02517	8.84194	0.0473247	9.5884	8.3732	7.5637	8.2558	7.8657	10.4875	9.0002	8.7151	8.2721	10.2977
TC1900007622.hg.1	ZNF254	zinc finger protein 254	-0.490719	8.13357	0.0473291	7.9341	7.3107	7.935	8.0005	8.2607	8.651	8.5131	8.5912	8.1557	7.9836
TC1100012959.hg.1	TIMM10B	translocase of inner mitochondrial membrane 10 homolog B (yeast)	-0.565601	7.89105	0.0473846	7.1751	7.0578	7.5144	8.3547	7.9393	8.3538	7.89	8.3492	8.3	7.9762
TC0100011592.hg.1	KCTD3	potassium channel tetramerization domain containing 3	-0.831163	5.81822	0.0474297	4.8732	5.8602	4.4664	5.4962	6.3172	5.5586	6.2624	5.9876	6.0751	7.2853
TC1700008498.hg.1	PPM1D	protein phosphatase. Mg2+/Mn2+ dependent 1D	-0.54241	6.81827	0.0474592	6.3621	6.2771	6.3776	6.6224	7.096	6.9909	6.4768	7.0877	7.2097	7.6822
TC0500013166.hg.1	LOC100506639	uncharacterized LOC100506639	-0.424066	5.49748	0.0475087	5.1793	5.4371	5.1137	5.446	5.2512	6.1287	5.7015	5.3752	5.5229	5.8192
TC1900006524.hg.1	CIRBP	cold inducible RNA binding protein	-0.520721	10.1491	0.0476162	9.658	9.5409	10.0472	9.709	10.4887	10.6116	9.9449	10.7283	10.5936	10.169
TC0800006738.hg.1	MTMR9	myotubularin related protein 9	-0.638531	5.52222	0.0476192	4.4959	4.5577	5.5151	5.9145	5.5315	5.5676	5.8249	5.6347	5.8756	6.3047
TC1700011917.hg.1	USP36	ubiquitin specific peptidase 36	-0.555538	7.66776	0.0476292	7.5768	7.0625	7.227	7.4774	7.6062	8.3865	7.1341	8.2215	7.7303	8.2553
TC1700007674.hg.1	TADA2A	transcriptional adaptor 2A	-0.453262	5.05607	0.0476795	4.4133	4.7289	4.7722	4.8645	5.3682	5.304	5.1403	5.4964	5.0763	5.3965
TC1000008452.hg.1	BTAF1	B-TFIID TATA-box binding protein associated factor 1	-0.551033	7.01955	0.0476923	6.8527	6.5522	6.8016	6.5319	6.9816	7.8303	6.5391	7.2435	7.1064	7.7561
TC1600009837.hg.1	GTF3C1	general transcription factor IIIC subunit 1	-0.411969	6.94561	0.0477059	6.6215	6.8562	6.619	6.6539	6.9476	7.5567	6.9318	6.9962	7.0148	7.2585
TC1900007085.hg.1	ZNF791	zinc finger protein 791	-0.422707	6.94668	0.0478927	6.539	6.3769	6.7963	7.0325	6.9318	6.9398	7.1941	7.2369	7.0306	7.3886
TC1900011817.hg.1	ZNF773	zinc finger protein 773	-0.552194	4.95134	0.048016	4.137	4.4238	4.6349	5.2938	4.8867	5.2905	4.6656	5.624	5.1958	5.3613
TC0100018308.hg.1	FCGR2A	Fc fragment of IgG receptor IIa	-0.534585	8.44421	0.0480183	8.6988	8.0897	7.9486	8.2603	7.8872	8.7627	9.3385	8.8211	8.3775	8.2576
TC1700012346.hg.1	CLDN7	claudin 7	0.442271	6.68138	0.0480247	7.2136	7.1475	6.7228	6.8542	6.5744	6.8437	6.2977	6.523	6.4225	6.2143
TC1100011374.hg.1	KMT5B	lysine methyltransferase 5B	-0.403467	6.50141	0.0480331	6.1002	6.1935	6.5231	6.2335	6.448	6.5332	6.4937	6.9251	6.6165	6.9472
TC1400009006.hg.1	TRAPPC6B	trafficking protein particle complex 6B	-0.72822	6.47673	0.0480459	6.0018	5.3637	6.1657	6.1898	6.8421	6.1807	7.5498	7.0452	7.2962	6.1323
TC0900006653.hg.1	TYRP1	tyrosinase related protein 1	1.65815	4.80647	0.0480765	5.9468	7.8504	3.4464	7.1945	3.7396	3.9028	4.7762	4.5486	3.0158	3.6436
TC0200014650.hg.1	LOC100144595	uncharacterized LOC100144595	0.417954	5.72269	0.0480974	5.9723	6.0191	5.8511	5.9932	5.8227	5.9095	5.1782	5.2412	5.6324	5.6072
TC0200007042.hg.1	KCNK3	potassium two pore domain channel subfamily K member 3	0.910369	10.0128	0.0481167	9.5794	10.1251	10.9201	10.9509	10.7644	9.7408	8.7442	10.218	10.6062	8.4788
TC1900011239.hg.1	CTU1	cytosolic thiouridylase subunit 1	0.390314	6.52797	0.0481185	6.9522	6.7916	6.6791	6.7905	6.4023	6.2633	6.3284	6.1363	6.4628	6.4733
TC2000007329.hg.1	ACTR5	ARP5 actin-related protein 5 homolog	-0.433826	5.00617	0.0482493	4.528	4.6566	4.9404	5.0002	4.8211	5.2745	5.5696	5.4075	4.8585	5.0054
TC0X00009855.hg.1	ZXDA	zinc finger. X-linked. duplicated A	-0.468116	4.61126	0.0482612	4.0627	4.3371	4.4569	4.1943	4.835	4.616	5.1522	5.1865	4.6192	4.6528
TC1000008423.hg.1	RPP30	ribonuclease P/MRP subunit p30	-0.512476	7.0729	0.048349	6.8268	6.3052	6.8491	7.1164	6.9859	6.8825	7.3249	7.1035	7.4053	7.9295
TC1900011060.hg.1	LIG1	DNA ligase 1	-0.501731	5.65846	0.0484255	5.3165	5.0175	5.4025	5.4292	5.8722	5.527	6.1597	6.136	5.4854	6.2385
TC1700011423.hg.1	FTSJ3	FtsJ homolog 3	-0.576899	4.40435	0.0484843	4.23	3.7382	3.9694	4.1498	4.4922	4.3223	4.1036	5.419	4.5662	5.0529
TC1100013042.hg.1	SSSCA1	Sjogren syndrome/scleroderma autoantigen 1	-0.435725	6.72558	0.0484861	6.4405	6.3499	6.284	6.6097	6.8545	6.8472	6.9238	7.0363	6.5828	7.3271
TC0100008326.hg.1	FAM159A	family with sequence similarity 159 member A	0.484375	4.94715	0.0485285	5.4964	5.4605	4.8742	5.261	4.8546	5.0437	4.8435	4.2825	4.9146	4.4405
TC1700011032.hg.1	GNGT2	G protein subunit gamma transducin 2	0.51458	5.48861	0.0486279	6.243	5.882	5.5467	5.7757	5.282	5.376	5.3125	4.8991	5.7045	4.8645
TC1700012322.hg.1	GLOD4	glyoxalase domain containing 4	0.412439	4.79226	0.0486937	5.1735	5.1293	4.8086	5.0542	4.8267	4.2692	4.6591	4.897	4.3899	4.715
TC0200008911.hg.1	ZC3H6	zinc finger CCCH-type containing 6	-0.515889	5.6546	0.0487153	5.3986	5.058	5.437	5.7896	5.3	6.1288	6.245	6.215	5.7492	5.2248
TC1900008257.hg.1	ZNF227	zinc finger protein 227	-0.441239	6.24623	0.0487853	5.8807	5.8944	6.0687	5.7844	6.4999	6.1166	6.3402	6.6585	6.5687	6.6503
TC2000010035.hg.1	SOX18	SRY-box 18	0.449334	5.53682	0.0487899	5.8618	5.8299	5.6341	5.871	5.6107	5.2752	5.256	5.6324	5.6421	4.7551
TC0500007699.hg.1	SMN1	survival of motor neuron 1. telomeric	-0.506594	7.91471	0.0488179	7.8762	7.1873	7.5755	7.771	7.8971	8.278	8.2448	8.1973	7.5226	8.5973
TC0700009020.hg.1	SND1	staphylococcal nuclease and tudor domain containing 1	-0.435871	7.99613	0.0488521	7.9154	7.4528	7.9522	7.7137	7.8568	8.509	8.0338	7.7971	8.3058	8.4247
TC1200008933.hg.1	TPCN1	two pore segment channel 1	-0.501973	8.55122	0.0488757	8.4002	8.1348	8.0391	8.4216	8.5055	9.0309	8.7036	8.621	8.2463	9.4093
TC0100010664.hg.1	ZBTB37	zinc finger and BTB domain containing 37	-0.560021	5.18785	0.0489462	5.3333	4.852	4.6623	4.7585	4.9331	5.9748	5.0389	6.0253	5.411	4.8893
TC0100015822.hg.1	S100A11	S100 calcium binding protein A11	-1.01995	9.09406	0.0489556	8.4137	8.1152	7.8206	8.6243	9.9466	9.2048	10.3512	8.3941	9.301	10.7691
TC1100010762.hg.1	NUP160	nucleoporin 160	-0.39977	7.09484	0.0489829	6.9398	7.1405	6.786	6.699	6.9095	7.2731	7.0477	7.1307	7.4327	7.5894
TC0300006982.hg.1	TRIM71	tripartite motif containing 71	0.469276	5.2548	0.0490649	5.7214	5.6267	5.1858	5.3594	5.554	5.3804	4.4346	4.9539	5.2542	5.0777
TC0600009753.hg.1	STXBP5	syntaxin binding protein 5	-0.754285	4.46458	0.0491238	4.3904	3.9181	3.8999	4.125	4.1038	5.4636	4.5918	4.3898	3.8107	5.9527
TC0100006476.hg.1	SAMD11	sterile alpha motif domain containing 11	0.418715	6.57723	0.0491246	6.9485	6.8608	6.8275	6.9927	6.3035	6.2994	6.6046	6.462	6.2096	6.2637
TC1400010033.hg.1	ASB2	ankyrin repeat and SOCS box containing 2	0.425563	5.6634	0.0491477	5.908	5.5583	6.1653	5.8788	5.8705	5.7319	5.2814	5.2389	5.7364	5.2646
TC0800011074.hg.1	C8orf88	chromosome 8 open reading frame 88	-0.934547	5.36431	0.0492311	4.7246	6.1783	5.8449	3.951	3.7865	5.4335	5.5548	6.0592	5.8177	6.2927
TC1000011376.hg.1	CH25H	cholesterol 25-hydroxylase	1.24345	7.24961	0.0493251	8.2747	7.4447	7.3373	7.5269	8.7731	8.1442	6.5857	6.321	7.6534	4.4352
TC0800012422.hg.1	VCPIP1	valosin containing protein interacting protein 1	-0.541246	6.39506	0.049532	5.8574	5.3847	6.8463	6.2568	6.2769	6.7191	6.5324	6.7444	6.768	6.5645
TC0500013423.hg.1	HNRNPH1	heterogeneous nuclear ribonucleoprotein H1 (H)	-0.423226	9.04467	0.0496386	9.216	8.7205	8.6919	8.6277	8.9092	9.2197	9.2662	8.9449	9.2458	9.6048
TC1300007148.hg.1	CYSLTR2	cysteinyl leukotriene receptor 2	1.6046	7.03953	0.0496964	8.9252	6.9273	7.365	8.4542	7.5376	8.2061	4.2926	4.9491	8.3036	5.4347
TC1200012723.hg.1	ZNF664	zinc finger protein 664	-0.743526	6.37125	0.0497001	6.1094	5.3786	6.1167	6.2143	6.1784	5.9088	5.9996	6.72	7.5284	7.5583
TC1900009459.hg.1	INSR	insulin receptor	-0.634196	6.78645	0.0498292	6.5703	6.2367	7.3175	5.6508	6.5714	6.9116	6.6315	7.3099	7.5732	7.0916
TC0900006758.hg.1	DENND4C	DENN domain containing 4C	-0.474232	6.6589	0.0498674	6.1846	5.9114	6.7947	6.4641	6.7541	6.7361	6.6048	7.1299	7.0711	6.9381
TC0X00010880.hg.1	MOSPD1	motile sperm domain containing 1	-0.6302	6.28244	0.0499117	5.726	4.9407	6.1002	6.4387	6.6312	6.5551	6.315	6.7262	6.5469	6.8445
TC0100009929.hg.1	SETDB1	SET domain bifurcated 1	-0.633579	6.84759	0.0499172	6.7619	6.0025	6.2033	6.3573	7.3289	7.6266	6.5167	6.8738	7.2499	7.5548
TC1900011251.hg.1	NKG7	natural killer cell granule protein 7	0.487321	7.13039	0.0499369	7.212	7.5752	7.1516	7.234	7.6975	7.2176	6.6788	6.4059	7.3531	6.7782

## Sheet: Supplementary Table S2
Supplementary Table S2
Genes listed in the Oncogene Database that are significantly downregulated in the D842V subgroup
Gene Symbol	Gene name	logFC	AveExpr	P.Value
BCL11A	B-cell CLL/lymphoma 11A	-2.01997	6.21497	0.000212041
PTCH1	patched 1	-0.880579	9.09043	0.00142736
ABL2	ABL proto-oncogene 2. non-receptor tyrosine kinase	-0.78241	5.90133	0.00154991
ZBTB16	zinc finger and BTB domain containing 16	-1.30155	7.23105	0.00168118
KDM5B	lysine demethylase 5B	-0.911272	7.44277	0.00252398
KLF6	Kruppel like factor 6	-0.728025	8.18314	0.00368317
CTGF	connective tissue growth factor	-1.54954	7.25024	0.00491439
NFIB	nuclear factor I B	-0.881271	9.89821	0.004991
SIRT1	sirtuin 1	-0.613465	7.14678	0.00524582
ETV3	ETS variant 3	-0.707183	7.57138	0.0065606
BCL6	B-cell CLL/lymphoma 6	-0.976805	7.56591	0.00761956
NBPF12	neuroblastoma breakpoint family member 12	-0.823182	7.57019	0.00860309
SETBP1	SET binding protein 1	-0.720307	8.13735	0.00868705
SMURF1	SMAD specific E3 ubiquitin protein ligase 1	-0.712891	7.27236	0.00938376
ABL1	ABL proto-oncogene 1. non-receptor tyrosine kinase	-0.540798	8.33815	0.0100753
BRD4	bromodomain containing 4	-0.699199	8.85285	0.0115216
SRSF1	serine and arginine rich splicing factor 1	-0.528252	8.77075	0.0115436
PRDM10	PR/SET domain 10	-0.604127	5.69897	0.0119419
SNAI1	snail family transcriptional repressor 1	-0.663888	5.57744	0.0121166
FOXO1	forkhead box O1	-0.623026	5.8767	0.013071
YAP1	Yes associated protein 1	-0.763974	6.93555	0.0135442
KAT6A	lysine acetyltransferase 6A	-0.674054	7.40427	0.0135909
SPARC	secreted protein acidic and cysteine rich	-0.610592	10.5282	0.0154653
FNDC3B	fibronectin type III domain containing 3B	-0.581327	9.14528	0.0169495
TFCP2	transcription factor CP2	-0.57704	6.39731	0.0173635
EPS8	epidermal growth factor receptor pathway substrate 8	-0.668818	7.78317	0.0178087
DDX6	DEAD-box helicase 6	-0.546429	8.41194	0.0182272
MCL1	BCL2 family apoptosis regulator	-0.789499	9.42807	0.020036
NCOA3	nuclear receptor coactivator 3	-0.542924	7.96198	0.0201143
WHSC1L1	Wolf-Hirschhorn syndrome candidate 1-like 1	-0.514962	9.17591	0.0201685
BRAF	B-Raf proto-oncogene. serine/threonine kinase	-0.5066	7.33882	0.0204272
EWSR1	EWS RNA binding protein 1	-0.524501	7.92743	0.0219527
SWAP70	SWAP switching B-cell complex 70kDa subunit	-0.532216	6.15062	0.0243254
PITX2	paired like homeodomain 2	-1.10056	5.89938	0.0246556
PTP4A1	protein tyrosine phosphatase type IVA. member 1	-0.659561	9.26243	0.0248193
MCC	mutated in colorectal cancers	-0.635266	7.4905	0.0262237
SERTAD1	SERTA domain containing 1	-0.749489	6.55951	0.0277393
NUP214	nucleoporin 214	-0.554239	8.41982	0.0285103
GAB2	GRB2 associated binding protein 2	-0.676263	6.43374	0.0287791
PPARG	peroxisome proliferator activated receptor gamma	-0.935221	4.56588	0.0308855
NRAS	neuroblastoma RAS viral oncogene homolog	-0.650705	6.31565	0.031419
AGFG1	ArfGAP with FG repeats 1	-0.469112	7.58592	0.0318656
DDHD2	DDHD domain containing 2	-0.616987	6.766	0.0330215
CBL	Cbl proto-oncogene	-0.647034	6.37232	0.0345744
MDM4	MDM4. p53 regulator	-0.45672	6.9522	0.0347575
EMSY	EMSY. BRCA2 interacting transcriptional repressor	-0.613552	8.05714	0.035809
PDGFRA	platelet derived growth factor receptor alpha	-0.47341	11.9148	0.0366491
NSD1	nuclear receptor binding SET domain protein 1	-0.488471	6.93441	0.0368259
SART3	squamous cell carcinoma antigen recognized by T-cells 3	-0.597432	5.98383	0.0385926
SGK1	serum/glucocorticoid regulated kinase 1	-0.852463	4.90922	0.0387179
RSF1	remodeling and spacing factor 1	-0.46723	7.87639	0.0396953
USP22	ubiquitin specific peptidase 22	-0.499401	9.26068	0.0397159
GLI3	GLI family zinc finger 3	-0.680008	7.36925	0.0413317
SKP2	S-phase kinase associated protein 2	-0.572449	5.60499	0.0413377
GNA13	G protein subunit alpha 13	-0.546464	7.92142	0.0425461
SPRY2	sprouty RTK signaling antagonist 2	-1.02819	6.08959	0.044224
YY1AP1	YY1 associated protein 1	-0.437453	8.74167	0.0445451
PPM1D	protein phosphatase. Mg2+/Mn2+ dependent 1D	-0.54241	6.81827	0.0474592
SETDB1	SET domain bifurcated 1	-0.633579	6.84759	0.0499172

## Sheet: Supplementary Table S3
Supplementary Table S3
Results of Gene Ontology biological process enrichment performed with WebGestald. Bold row highlight the significantly enriched GO terms (FDR<0.05).
	Gene Set	Description	Enrichment Score	Normalized Enrichment Score	pValue	FDR	Size	Leading Edge Number	Leading Edge Genes
GO biological process enriched in D842V	GO:0034340	response to type I interferon	-0.639689	-3.09358	0	0	18	15	HLA-F;IFI27;IFI6;IFIT1;IFIT2;IFIT3;IKBKE;IRAK1;IRF1;ISG15;MX2;OAS1;OAS3;OASL;RSAD2
	GO:0098542	defense response to other organism	-0.461663	-3.11469	0	0	36	21	BCL3;CD160;DEFB124;EXOSC5;IFI27;IFI6;IFIH1;IFIT1;IFIT2;IFIT3;IRF1;ISG15;KLRC4-KLRK1;OAS1;OAS3;OASL;PARP9;RARRES2;ROMO1;RSAD2;RTP4
	GO:0009615	response to virus	-0.415369	-2.73303	0	0.00044	34	18	BCL3;DUOX2;EXOSC5;IFI27;IFI6;IFIH1;IFIT1;IFIT2;IFIT3;IRF1;ISG15;OAS1;OAS3;OASL;PARP9;RSAD2;RTP4;XCL1
	GO:0002250	adaptive immune response	-0.41975	-2.43242	0	0.00791415	26	15	BCL3;C2;CD244;EOMES;HLA-F;IRF1;KLRC4-KLRK1;PRKCZ;PRR7;RAB27A;RELB;RFTN1;RSAD2;TAP1;XCL1
	GO:0006959	humoral immune response	-0.561586	-2.17682	0.00248139	0.0443193	11	10	AIRE;BCL3;C2;CFB;COL20A1;ITLN1;PSMB10;RARRES2;ROMO1;RPL39
	GO:0002449	lymphocyte mediated immunity	-0.444212	-2.04403	0.0078534	0.0685069	16	8	BCL3;C2;HLA-F;KLRC4-KLRK1;PRKCZ;RFTN1;RSAD2;XCL1
	GO:0032609	interferon-gamma production	-0.668186	-2.06122	0.00236967	0.0685893	7	6	BCL3;CD244;EOMES;ISG15;KLRC4-KLRK1;XCL1
	GO:0035456	response to interferon-beta	-0.779059	-2.08303	0.00219298	0.0691389	5	5	IFIT1;IFIT3;IKBKE;IRF1;NDUFA13
	GO:0034341	response to interferon-gamma	-0.372893	-1.84532	0.0102041	0.133834	18	10	CAMK2D;HLA-F;IRF1;OAS1;OAS3;OASL;PARP14;PARP9;XCL1;XCL2
	GO:0001906	cell killing	-0.566665	-1.9216	0.00697674	0.134247	8	6	DNASE1L3;HLA-F;KLRC4-KLRK1;RAB27A;ROMO1;XCL1
GO biological process enriched in non-D842V	GO:0048545	response to steroid hormone	0.470492	2.63612	0	0.0024547	31	19	BMP4;CASP3;CLOCK;CNOT2;DDX17;EP300;FOXO1;MED1;NR3C1;NR4A1;NR4A2;NR4A3;PER1;PTGS2;RNF4;SIRT1;SPARC;YAP1;ZFP36
	GO:0001101	response to acid chemical	0.477359	2.4533	0	0.0110461	26	16	ABL2;AKR1B1;BCL11A;CASP3;CLK2;EGR1;FOXO1;GCLC;GNG2;IPO5;LDLR;PDK4;PTCH1;PTGS2;SPARC;YAP1
	GO:0030856	regulation of epithelial cell differentiation	0.528717	2.3299	0.00163666	0.0230128	18	14	BMP4;CLOCK;FAT4;HES1;MED1;NCOA3;NUMA1;PRKX;PTCH1;STAT5B;VEZF1;YAP1;ZEB1;ZFP36
	GO:0035690	cellular response to drug	0.479017	2.33126	0	0.0306837	23	16	ABL1;BCL11A;BRAF;CTNNA1;EGR1;FOXO1;GCLC;HGF;NFE2L2;NR3C1;NR4A3;PTGS2;SIN3A;SIRT1;TP53INP1;TRIM41
	GO:0007568	aging	0.494709	2.26315	0.00161812	0.0358386	20	15	ABL1;APOD;BCL6;CTNNA1;DNMBP;GCLC;KAT6A;NFE2L2;PPP1R9A;PTGS2;SEC63;SIN3A;SIRT1;SNCA;WRN
	GO:0060560	developmental growth involved in morphogenesis	0.430842	2.18194	0.00159236	0.0535943	26	15	ABL1;BCL11A;BMP4;CCL11;CDKL5;EPB41L5;FN1;KDM5B;KIF26B;MED1;NIN;SEMA3A;SMURF1;SPRY1;YAP1
	GO:0045444	fat cell differentiation	0.418096	2.13973	0.00161031	0.053867	26	15	ADGRF5;EP300;FOXO1;GPS2;HES1;MED1;NR4A1;NR4A2;NR4A3;OSBPL8;PTGS2;SH3PXD2B;SIRT1;ZBTB16;ZFP36
	GO:0030522	intracellular receptor signaling pathway	0.367423	2.1035	0.00160514	0.0588012	33	21	CITED2;CLOCK;CNOT2;DDX17;EP300;GPS2;LATS1;LSM14A;MED1;NCOA3;NR3C1;NR4A1;NR4A2;NR4A3;PER1;PUM1;RNF4;SIRT1;TAB3;YAP1;YWHAH
	GO:0006929	substrate-dependent cell migration	0.720978	2.11643	0.00526316	0.0594037	7	5	EPB41L5;FN1;MYH10;OPHN1;SEMA3A
	GO:0050673	epithelial cell proliferation	0.360517	2.13978	0.00151745	0.0606004	37	27	BMP4;CCL11;CCL2;EGR3;GATA2;HES1;HIF1A;KDM5B;LAMB1;MCC;MED1;NF1;NFIB;NR4A1;NR4A3;NRAS;PLCG1;PPARG;PRKX;PTCH1;SAV1;SIRT1;SP1;SPARC;YAP1;ZFP36;ZFP36L1

## Sheet: Supplementary Table S4
Supplementary Table S4
Results obtained with the Gene Set Enrichment Analysis tool. Bold row highlight the significantly enriched signatures (FDR<0.05).
	NAME	SIZE	Enrichment Score	Normalized Enrichment Score	Nominal p-val	FDR q-val	FWER p-val
GO biological process enriched in D842V	REACTOME_INTERFERON_SIGNALING	20	0.621294	2.74336	0	0	0
	REACTOME_IMMUNE_SYSTEM	56	0.372214	2.32838	0	0.000366667	0.001
	REACTOME_CYTOKINE_SIGNALING_IN_IMMUNE_SYSTEM	28	0.437429	2.1516	0	0.00368605	0.012
	REACTOME_GPCR_LIGAND_BINDING	22	0.436384	1.93199	0.00498753	0.0134404	0.059
	NABA_SECRETED_FACTORS	26	0.349958	1.6694	0.0298103	0.0525607	0.268
	REACTOME_GPCR_DOWNSTREAM_SIGNALING	27	0.322242	1.54948	0.0478873	0.0916631	0.492
	REACTOME_SIGNALING_BY_GPCR	35	0.266449	1.4106	0.0929578	0.153755	0.742
	KEGG_CHEMOKINE_SIGNALING_PATHWAY	18	0.308586	1.30145	0.157107	0.213725	0.891
	REACTOME_NEURONAL_SYSTEM	16	0.263766	1.06633	0.361111	0.448941	0.995
	KEGG_CALCIUM_SIGNALING_PATHWAY	15	0.24837	0.971861	0.482323	0.532994	1
	REACTOME_METABOLISM_OF_AMINO_ACIDS_AND_DERIVATIVES	15	0.235025	0.909507	0.575377	0.57441	1
GO biological process enriched in non-D842V	REACTOME_GENERIC_TRANSCRIPTION_PATHWAY	36	-0.446111	-2.13521	0	0.00765297	0.007
	KEGG_PATHWAYS_IN_CANCER	38	-0.38636	-1.87	0.00310078	0.0484719	0.125
	NABA_ECM_GLYCOPROTEINS	19	-0.485372	-1.87659	0.00679117	0.0678333	0.116
	NABA_MATRISOME	77	-0.294315	-1.71568	0.00588235	0.106159	0.325
	NABA_MATRISOME_ASSOCIATED	50	-0.285428	-1.49339	0.0488889	0.235252	0.794
	NABA_CORE_MATRISOME	27	-0.335337	-1.46154	0.0773026	0.237885	0.838
	KEGG_FOCAL_ADHESION	15	-0.419253	-1.50719	0.0659722	0.256446	0.772
	REACTOME_CELL_CYCLE_MITOTIC	20	-0.340142	-1.33416	0.155089	0.26525	0.964
	REACTOME_AXON_GUIDANCE	21	-0.375278	-1.53324	0.065625	0.267891	0.723
	NABA_ECM_REGULATORS	16	-0.373848	-1.35217	0.152801	0.268323	0.956
	REACTOME_PPARA_ACTIVATES_GENE_EXPRESSION	15	-0.363614	-1.31119	0.182724	0.272446	0.976
	REACTOME_METABOLISM_OF_PROTEINS	17	-0.372521	-1.38645	0.110224	0.277006	0.928
	REACTOME_CELL_CYCLE	24	-0.323529	-1.35921	0.136218	0.285041	0.952
	REACTOME_HEMOSTASIS	36	-0.292975	-1.39717	0.0892308	0.293681	0.92
	REACTOME_FATTY_ACID_TRIACYLGLYCEROL_AND_KETONE_BODY_METABOLISM	18	-0.325603	-1.25271	0.201288	0.32426	0.992
	REACTOME_DEVELOPMENTAL_BIOLOGY	40	-0.242352	-1.19248	0.229483	0.353375	0.998
	REACTOME_TRANSMEMBRANE_TRANSPORT_OF_SMALL_MOLECULES	18	-0.306967	-1.19424	0.266442	0.37298	0.998
	REACTOME_ADAPTIVE_IMMUNE_SYSTEM	24	-0.258682	-1.09069	0.358578	0.447561	1
	REACTOME_PLATELET_ACTIVATION_SIGNALING_AND_AGGREGATION	16	-0.296111	-1.10147	0.342466	0.456854	1
	REACTOME_METABOLISM_OF_RNA	17	-0.277946	-1.03735	0.411955	0.495374	1
	REACTOME_METABOLISM_OF_LIPIDS_AND_LIPOPROTEINS	32	-0.211074	-1.00267	0.452859	0.519741	1
	KEGG_CYTOKINE_CYTOKINE_RECEPTOR_INTERACTION	18	-0.233919	-0.891822	0.578947	0.65138	1
	KEGG_TGF_BETA_SIGNALING_PATHWAY	15	-0.214942	-0.774549	0.746795	0.782693	1
	KEGG_MAPK_SIGNALING_PATHWAY	20	-0.187113	-0.734186	0.804523	0.796926	1

## Sheet: Supplementary Table S5
Supplementary Table S5
CIBERSORT absolute and relative quantification of 22 immune cell subtypes.
Absolute quantification	Group	Input Sample	B cells naive	B cells memory	Plasma cells	T cells CD8	T cells CD4 naive	T cells CD4 memory resting	T cells CD4 memory activated	T cells follicular helper	T cells regulatory (Tregs)	T cells gamma delta	NK cells resting	NK cells activated	Monocytes	Macrophages M0	Macrophages M1	Macrophages M2	Dendritic cells resting	Dendritic cells activated	Mast cells resting	Mast cells activated	Eosinophils	Neutrophils	P-value	Pearson Correlation	Absolute score
	D842V	GIST140	0.0988192	0	0.00979814	0.2271	0	0.097058	0.00876876	0	0.0962499	0	0.00976739	0.0871169	0.163781	0	0.0387379	0.182985	0.00908306	0	0.0620029	0	0	0	0.12	0.086574	1.09127
	D842V	GIST165	0.0478797	0	0	0.242182	0	0	0	0	0.159933	0	0.0510621	0.0410142	0.248591	0	0.0750921	0.117857	0.0182122	0	0.0716483	0	0	0	0.23	0.0638547	1.07347
	D842V	GIST138	0	0.0461632	0	0.172049	0	0.0132817	0	0	0.0842034	0	0.0454176	0.108729	0.166773	0	0.0454524	0.218152	0.0106328	0.00580585	0.0663498	0	0	0	0.12	0.105305	0.98301
	D842V	GIST142	0.0767534	0	0	0.242167	0	0.126249	0	0	0.0692763	0	0.0338546	0.0350216	0.0786162	0	0.0188678	0.382131	0	0.00463132	0.0265402	0	0	0	0.02	0.168485	1.09411
	D842V	GIST136	0.125724	0	0	0.242796	0	0	0	0	0.134203	0	0.0564832	0.0474464	0.0960049	0	0.0175558	0.253982	0	0	0.0135362	0	0	0	0.03	0.139137	0.987731
	non-D842V	GIST12	0.0936912	0	0.0362924	0.15767	0	0.274159	0	0	0.0603544	0	0.0722633	0.0627081	0.0979901	0	0.0331911	0.180703	0	0	0.0550125	0	0	0	0.12	0.0957508	1.12403
	non-D842V	GIST168	0.085374	0	0.00532997	0.1811	0	0.323925	0	0	0	0	0.0201174	0.0211721	0.0716843	0	0.030712	0.29235	0	0	0.0499275	0	0	0	0.02	0.156314	1.08169
	non-D842V	GIST05	0	0.00902058	0.0117218	0.0954068	0	0.0902201	0	0	0.115686	0	0.0487332	0.0136678	0.154744	0	0.0132794	0.254043	0.0169302	0	0.0293927	0	0	0	0.54	0.0298181	0.852845
	non-D842V	GIST15	0.132399	0	0.0335414	0.128928	0	0.115039	0	0	0.0793456	0	0.0725959	0.0583222	0.0552646	0	0.017837	0.217532	0	0.00413842	0.0388976	0	0	0	0.23	0.0659914	0.953842
	non-D842V	GIST26	0.178237	0	0	0.107391	0	0.0605561	0	0	0.0245083	0	0.0514311	0.0863734	0.128728	0	0.0241172	0.0782142	0.00650242	0	0.05713	0	0.0132353	0	0.55	0.0281976	0.816425
Relative quantification	Group	Input Sample	B cells naive	B cells memory	Plasma cells	T cells CD8	T cells CD4 naive	T cells CD4 memory resting	T cells CD4 memory activated	T cells follicular helper	T cells regulatory (Tregs)	T cells gamma delta	NK cells resting	NK cells activated	Monocytes	Macrophages M0	Macrophages M1	Macrophages M2	Dendritic cells resting	Dendritic cells activated	Mast cells resting	Mast cells activated	Eosinophils	Neutrophils	P-value	Pearson Correlation	RMSE
	D842V	GIST140	0.0905544	0	0.00897867	0.208106	0	0.0889405	0.00803539	0	0.0882	0	0.00895049	0.0798308	0.150083	0	0.035498	0.167681	0.0083234	0	0.0568173	0	0	0	0.12	0.086574	1.0572
	D842V	GIST165	0.0446027	0	0	0.225606	0	0	0	0	0.148986	0	0.0475673	0.0382071	0.231577	0	0.0699526	0.10979	0.0169657	0	0.0667445	0	0	0	0.23	0.0638547	1.06903
	D842V	GIST138	0	0.046961	0	0.175022	0	0.0135112	0	0	0.0856588	0	0.0462025	0.110609	0.169655	0	0.046238	0.221923	0.0108166	0.0059062	0.0674966	0	0	0	0.12	0.105305	1.05577
	D842V	GIST142	0.0701515	0	0	0.221337	0	0.11539	0	0	0.0633176	0	0.0309426	0.0320093	0.0718541	0	0.0172449	0.349262	0	0.00423296	0.0242574	0	0	0	0.02	0.168485	1.02655
	D842V	GIST136	0.127286	0	0	0.245812	0	0	0	0	0.13587	0	0.0571848	0.0480357	0.0971974	0	0.0177739	0.257136	0	0	0.0137044	0	0	0	0.03	0.139137	1.04135
	non-D842V	GIST12	0.0833526	0	0.0322876	0.140271	0	0.243906	0	0	0.0536944	0	0.0642892	0.0557884	0.0871771	0	0.0295286	0.160763	0	0	0.048942	0	0	0	0.12	0.0957508	1.0574
	non-D842V	GIST168	0.0789262	0	0.00492743	0.167423	0	0.299462	0	0	0	0	0.0185981	0.0195731	0.0662705	0	0.0283925	0.270271	0	0	0.0461569	0	0	0	0.02	0.156314	1.0304
	non-D842V	GIST05	0	0.010577	0.0137443	0.111869	0	0.105787	0	0	0.135647	0	0.0571419	0.0160261	0.181444	0	0.0155708	0.297877	0.0198514	0	0.0344643	0	0	0	0.54	0.0298181	1.07857
	non-D842V	GIST15	0.138806	0	0.0351646	0.135167	0	0.120606	0	0	0.0831853	0	0.0761089	0.0611445	0.057939	0	0.0187002	0.228059	0	0.00433869	0.0407799	0	0	0	0.23	0.0659914	1.06548
	non-D842V	GIST26	0.218314	0	0	0.131539	0	0.0741722	0	0	0.030019	0	0.0629955	0.105795	0.157673	0	0.0295401	0.0958008	0.0079645	0	0.0699758	0	0.0162113	0	0.55	0.0281976	1.09083

## Sheet: Supplementary Table S6
Supplementary Table S6
For each sample the TIS score was computed. The following tables shows the calculations. Final TIS score is reported in the yellow row
RMA Data TIS genes
TIS genes	GIST140	GIST165	GIST138	GIST142	GIST136	GIST12	GIST168	GIST05	GIST15	GIST26
CD2	5.19279	4.76679	4.05819	5.43875	4.49301	6.28701	5.53617	3.69565	3.98483	3.42549
STAT1	10.3917	10.0152	10.4606	9.65172	10.6185	10.3605	9.77349	9.35766	9.91561	9.02981
CXCR6	5.13045	3.78319	4.35698	4.47496	4.04333	4.47463	4.26293	3.80117	4.72224	4.19408
CXCL13	3.42384	2.85017	3.04568	3.19426	4.13214	2.6175	2.69705	2.75565	3.27086	3.05753
CXCL10	5.57619	7.92034	7.85024	6.1247	5.19894	7.25922	6.25877	2.8185	4.74422	3.92408
GZMK	3.84996	3.47187	5.21487	5.61459	5.07246	4.69582	5.56055	2.93901	4.81047	3.30627
HLA-E	8.84308	8.66515	9.04733	9.31718	9.59699	9.09592	9.01995	7.7686	9.32634	8.64342
HLA-DRA	10.8162	10.5013	10.7822	11.2667	10.9346	10.3856	11.4504	10.0407	10.8796	8.96095
TAGAP	5.89922	5.51346	5.42499	5.76744	5.23879	6.00679	5.86547	5.36688	5.693	4.96669
IDO1	4.55917	4.92223	5.31592	4.85112	5.16047	5.0801	4.64152	4.96321	6.44766	4.54422
IL2RG	7.2753	6.95566	7.67279	7.97506	8.3965	8.62597	7.59162	6.20592	7.90818	6.48074
CD3E	7.25957	6.98486	6.91051	7.27094	7.62036	8.37821	7.71364	5.47258	6.73749	5.25028
CD3D	4.42207	3.57517	3.72199	4.15534	3.67847	4.43404	4.06367	3.43861	3.44882	3.04215
LAG3	4.76868	4.42856	4.59275	4.92873	5.4533	5.27455	4.40803	4.63759	4.35423	4.6693
GZMB	7.11972	6.89	6.77774	6.66253	6.74009	7.07918	6.28571	6.40481	6.35511	6.86577
CIITA	7.6379	7.61826	7.75322	8.24373	7.89397	9.15876	7.91088	7.96153	7.83991	6.52376
CCL5	8.07229	7.91217	8.51713	9.43041	8.51921	8.74197	8.09428	6.5788	8.69873	6.20848
NKG7	7.21201	7.57518	7.15158	7.234	7.69747	7.21762	6.67882	6.40592	7.35309	6.77817
RMA Data House Keeping
HK genes	GIST140	GIST165	GIST138	GIST142	GIST136	GIST12	GIST168	GIST05	GIST15	GIST26
STK11IP	6.16674	6.06888	5.74149	5.58585	6.44872	6.04882	5.57938	5.9887	5.42521	5.82534
SDHA	7.67686	8.04919	7.81539	7.44895	7.85069	7.92447	7.19571	7.8117	7.57581	7.67548
ABCF1	5.59477	5.65577	5.6584	5.8538	5.91089	5.93429	5.8152	5.72987	5.91169	5.91867
TBP	7.24907	7.71255	7.46103	7.53795	7.75757	7.94165	7.345	7.46254	7.83361	8.00982
G6PD	7.04616	7.34533	7.6011	7.37195	7.61332	7.38277	7.73417	7.56025	7.38498	7.47431
NRDE2	4.03614	4.71659	3.96809	4.25329	3.93817	3.68114	4.08572	3.9005	4.04563	3.82332
TBC1D10B	5.71627	5.24642	5.64035	5.24961	5.55923	5.68554	5.66178	5.05181	5.20796	5.68585
POLR2A	8.97286	8.81704	8.80934	8.89425	8.53028	9.7636	9.28497	9.57641	8.78738	8.29718
UBB	11.6026	11.5495	11.6721	11.6868	11.786	10.8742	11.6858	11.1552	11.582	11.6601
OAZ1	10.0688	9.78161	10.1996	10.4333	10.112	9.76144	10.257	9.64456	10.2847	10.2583
Average	7.41302	7.49429	7.45669	7.43157	7.55069	7.49979	7.46447	7.38816	7.4039	7.46283
Normalization
TIS genes	GIST140	GIST165	GIST138	GIST142	GIST136	GIST12	GIST168	GIST05	GIST15	GIST26
CD2	-2.22023	-2.7275	-3.3985	-1.99282	-3.05768	-1.21278	-1.9283	-3.69251	-3.41906	-4.03735
STAT1	2.97864	2.5209	3.00396	2.22015	3.06778	2.86068	2.30902	1.9695	2.51171	1.56698
CXCR6	-2.28257	-3.7111	-3.09971	-2.95661	-3.50736	-3.02516	-3.20154	-3.58699	-2.68166	-3.26876
CXCL13	-3.98919	-4.64412	-4.41101	-4.23731	-3.41855	-4.88229	-4.76742	-4.63251	-4.13304	-4.4053
CXCL10	-1.83683	0.426053	0.393556	-1.30687	-2.35175	-0.240573	-1.2057	-4.56966	-2.65968	-3.53875
GZMK	-3.56306	-4.02242	-2.24181	-1.81698	-2.47823	-2.80397	-1.90392	-4.44915	-2.59343	-4.15657
HLA-E	1.43005	1.17086	1.59064	1.88561	2.0463	1.59612	1.55548	0.380442	1.92244	1.18059
HLA-DRA	3.40319	3.00704	3.32548	3.83511	3.38392	2.88579	3.98589	2.65252	3.47571	1.49812
TAGAP	-1.51381	-1.98083	-2.0317	-1.66413	-2.3119	-1.493	-1.599	-2.02128	-1.7109	-2.49614
IDO1	-2.85385	-2.57206	-2.14076	-2.58044	-2.39022	-2.4197	-2.82295	-2.42495	-0.956241	-2.91862
IL2RG	-0.137724	-0.538626	0.216099	0.543492	0.845815	1.12618	0.127147	-1.18224	0.504281	-0.982097
CD3E	-0.153457	-0.509428	-0.546173	-0.160628	0.0696748	0.878421	0.249172	-1.91557	-0.666405	-2.21255
CD3D	-2.99095	-3.91912	-3.7347	-3.27623	-3.87222	-3.06575	-3.4008	-3.94955	-3.95508	-4.42069
LAG3	-2.64434	-3.06573	-2.86393	-2.50284	-2.09739	-2.22524	-3.05644	-2.75056	-3.04967	-2.79354
GZMB	-0.293305	-0.604293	-0.678943	-0.769034	-0.810603	-0.420613	-1.17876	-0.983343	-1.04879	-0.597065
CIITA	0.224876	0.123977	0.29653	0.812159	0.343284	1.65896	0.446409	0.573368	0.436007	-0.939074
CCL5	0.65927	0.417879	1.06045	1.99884	0.968517	1.24217	0.629813	-0.809354	1.29483	-1.25436
NKG7	-0.201011	0.0808952	-0.305107	-0.19757	0.146784	-0.282167	-0.785646	-0.982234	-0.0508071	-0.684661
Average	-0.888016	-1.14153	-0.864757	-0.675894	-0.856879	-0.545717	-0.919308	-1.79856	-0.93221	-1.91444
